# Supplementary material
Source: PubMed Central journal article supplement (PMC3653568)
Supplement: NIHMS50247-supplement-1.pdf [file NIHMS50247-supplement-1.pdf]

## SUPPLEMENTARY INFORMATION

### Table of Contents

#### Supplementary Figures

|                                                                                                                |    |
|----------------------------------------------------------------------------------------------------------------|----|
| Supplementary Figure 1   PDSP Compounds Activity and Prediction .....                                          | 3  |
| Supplementary Figure 2   Experimental testing of ligand predictions.....                                       | 5  |
| Supplementary Figure 3   Experimental testing of ligand function.....                                          | 51 |
| Supplementary Figure 4   Example of transformations.....                                                       | 63 |
| Supplementary Figure 5   Chemical structures of profiled ligands.....                                          | 64 |
| Supplementary Figure 6   Evolution of novel dopamine D2 ligands from donepezil.....                            | 70 |
| Supplementary Figure 7   Full evolution pathway from compound 5 to compounds 11a and 11b.....                  | 71 |
| Supplementary Figure 8   Evolution of novel dopamine D4 ligands from donepezil.....                            | 72 |
| Supplementary Figure 9   Full evolution pathway from donepezil to compound 13.....                             | 73 |
| Supplementary Figure 10   Behavioural responses of PC7 mice to compound 13 .....                               | 74 |
| Supplementary Figure 11   Full evolution pathway from compound 13 to a series of new morpholino compounds..... | 76 |
| Supplementary Figure 12   MCC vs model scores of test sets .....                                               | 77 |
| Supplementary Figure 13   ROC curves of the test sets .....                                                    | 78 |

#### Supplementary Methods

|                                                               |     |
|---------------------------------------------------------------|-----|
| Synthesis of isoindole analogues.....                         | 79  |
| Synthesis of benzolactam analogues .....                      | 88  |
| 2-Methyl-Indole .....                                         | 92  |
| Synthesis of morpholino analogues .....                       | 93  |
| <i>In vitro</i> metabolic stability .....                     | 109 |
| Assessment of brain penetration and brain tissue binding..... | 109 |
| Detailed behavioural results .....                            | 111 |

## Supplementary Tables

|                                                                                                                              |     |
|------------------------------------------------------------------------------------------------------------------------------|-----|
| Supplementary Table 1   Bayesian predictions .....                                                                           | 113 |
| Supplementary Table 2   Experimental radioligand percentage inhibition.....                                                  | 119 |
| Supplementary Table 3   Experimental competition binding affinity .....                                                      | 121 |
| Supplementary Table 4   Optimisation results for D2/CNS objectives .....                                                     | 123 |
| Supplementary Table 5   Predictions of synthesized isoindoles.....                                                           | 125 |
| Supplementary Table 6   Optimisation results for 5-HT <sub>1A</sub> /D2/D3/D4/ $\alpha_1$<br>selectivity/CNS objectives..... | 126 |
| Supplementary Table 7   Optimisation results for 5-HT <sub>1A</sub> /D2/D3/D4/CNS<br>objectives .....                        | 129 |
| Supplementary Table 8   Prediction of synthesized benzolactams .....                                                         | 132 |
| Supplementary Table 9   Optimisation results for D4/CNS objectives .....                                                     | 133 |
| Supplementary Table 10   Optimisation results for novelty/D4 selectivity/CNS<br>objectives .....                             | 137 |
| Supplementary Table 11   Predictions of synthesized morpholinos.....                                                         | 144 |
| Supplementary Table 12   Bayesian model statistics.....                                                                      | 150 |

## Supplementary References

|                                           |     |
|-------------------------------------------|-----|
| Supplementary information references..... | 156 |
|-------------------------------------------|-----|

# Supplementary Figure 1: PDSP compounds, activities in ChEMBL, bayesian prediction and experimental $k_i$ from PDSP database

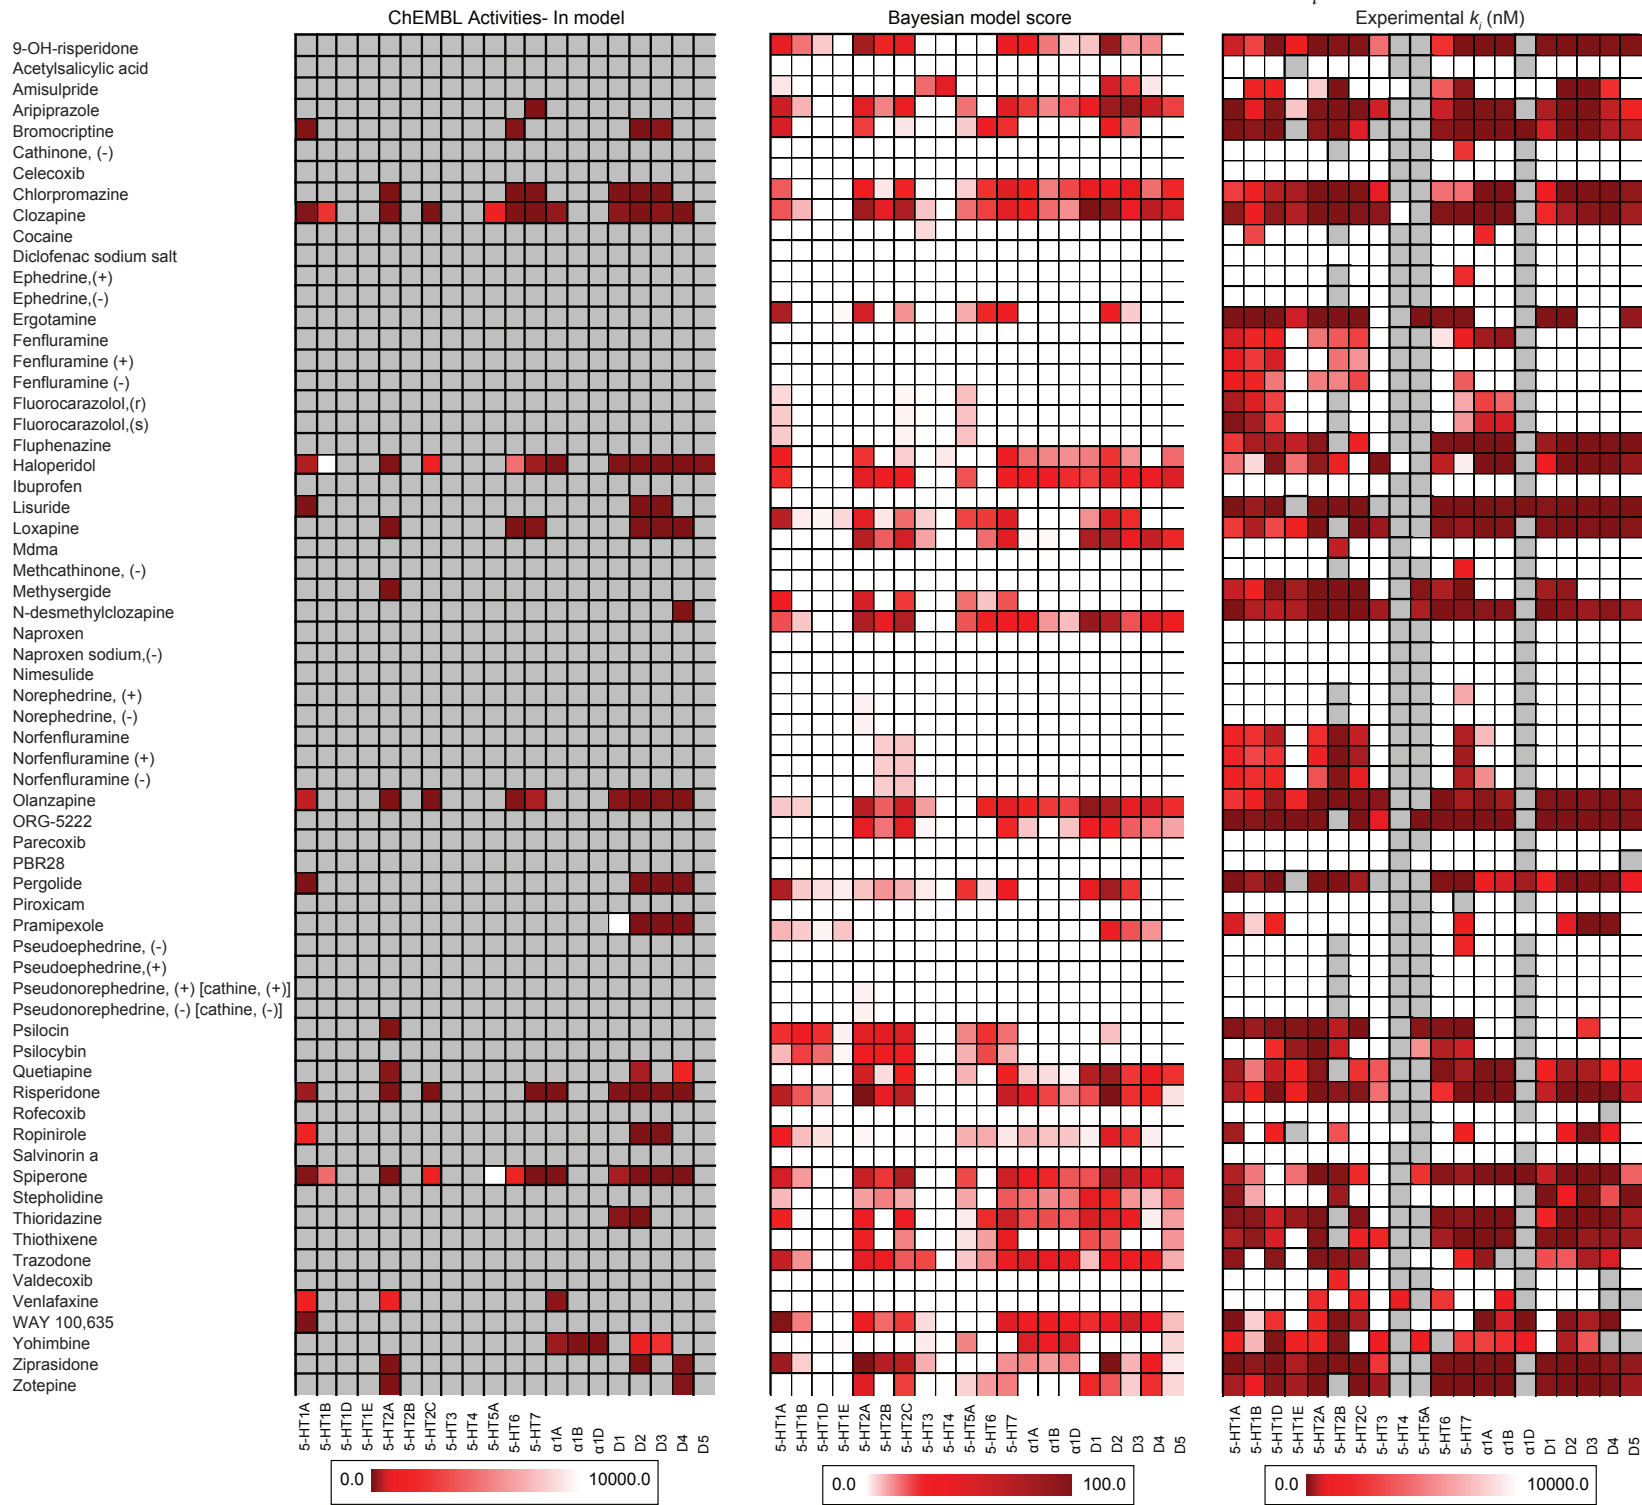

**Supplementary Figure 1: Predicting polypharmacology profiles.** The three matrices present are, from left to right, (i) all experimental activities of the respective compounds in ChEMBL for the 20 receptors analysed in the study (irrespective of confidence assignment); (ii) Bayesian model predictions for the compounds across models for the 20 receptors. The Bayesian model are constructed using the high confidence activity data in ChEMBL (see Methods); experimental  $k_i$  data from PDSP  $k_i$  database. Data was downloaded from the PDSP  $k_i$  database website, and the version used is kidb110121 (<http://pdsp.med.unc.edu/kidb.php>). Compounds were filtered to select those that had at least 15 recorded activities from the 20 GPCR receptors used in our screening study, in the PDSP  $k_i$  database. Then compounds were manually mapped to a ChEMBL identifier when it was possible and to respect the stereochemistry. Data from ChEMBL02 was retrieved from each compound to identify activities present in the GPCR models. For the prediction every compounds was scored for each GPCR receptors as described in Methods section. Of the 1300 datapoint predictions in the matrix (65 compounds x 20 receptor assays) 909 were experimentally confirmed correct ( $p < 2.2e^{-16}$ ), with a probability of success of 0.70 (95% confidence interval: 0.67 - 0.72). (Colour scheme: grey – no data; white – measure or predicted inactive; red shade – Bayesian score or  $k_i$  value).

**Supplementary Figure 2:** Experimental testing of ligand predictions

Figure is of all  $k_i$  for drugs 1 to 29r against a panel of 20 GPCR receptors. Receptors tested were 11 serotonergic receptors: 5-HT1A, 5-HT1B, 5-HT1D, 5-HT1E, 5-HT2A, 5-HT2B, 5-HT2C, 5-HT3, 5-HT5A, 5-HT6 and 5-HT7; 3 alpha adrenergic receptors:  $\alpha$ 1A,  $\alpha$ 1B and  $\alpha$ 1D; and 5 dopaminergic receptors: D1, D2, D3, D4 and D5.

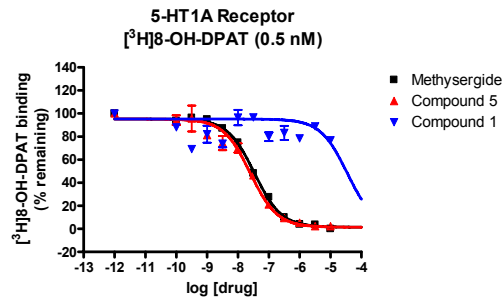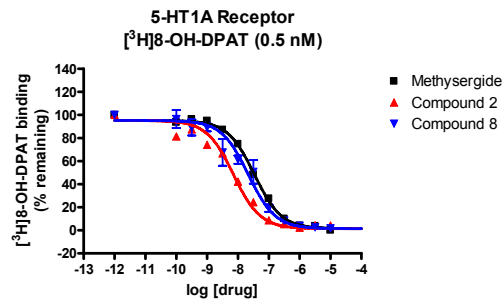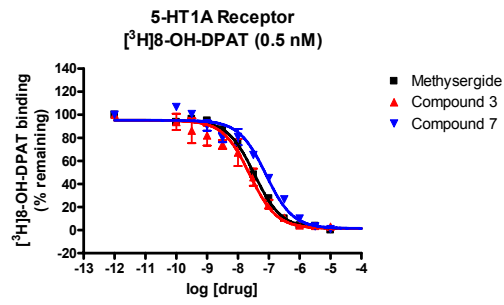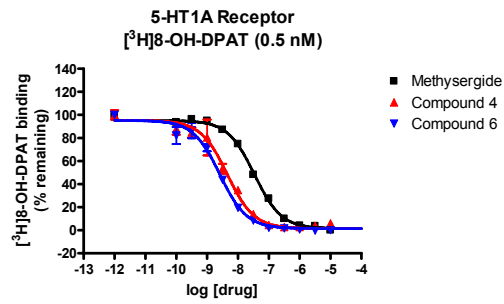

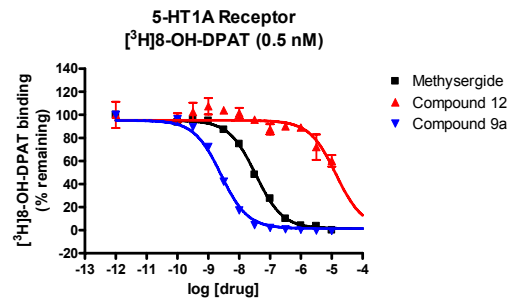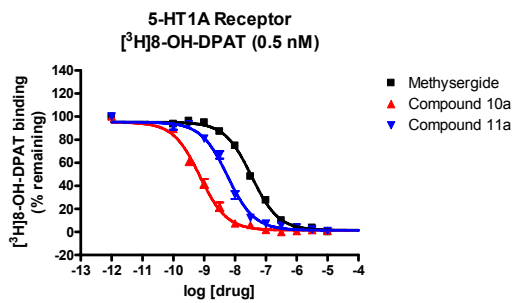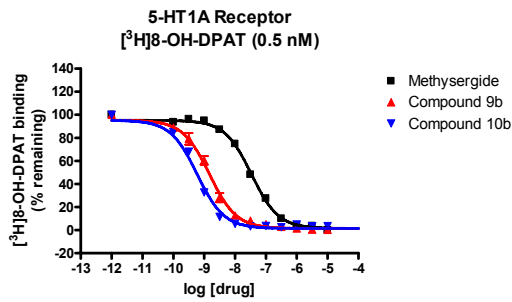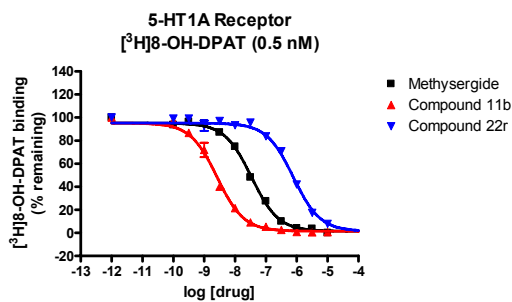

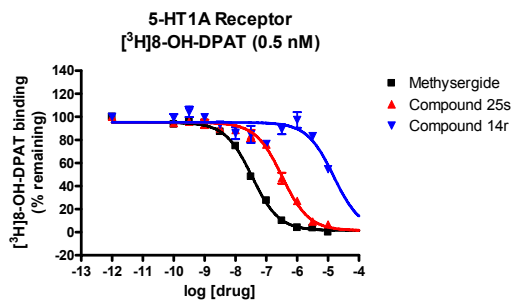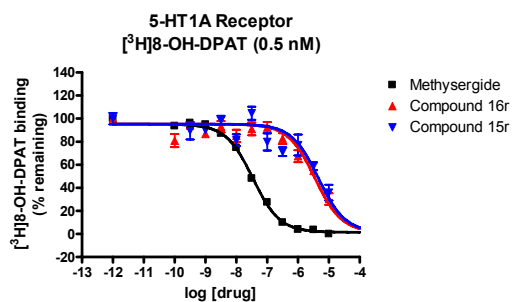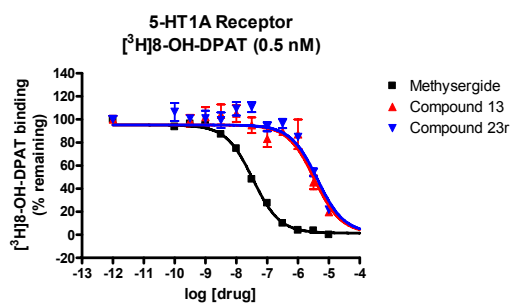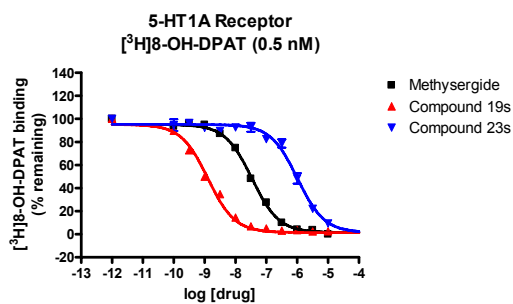



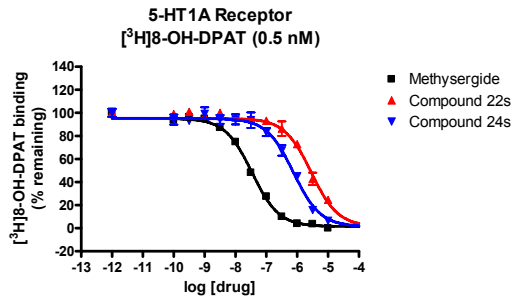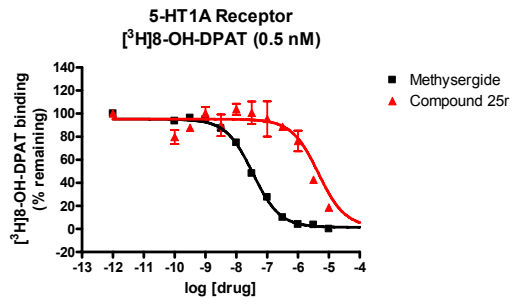

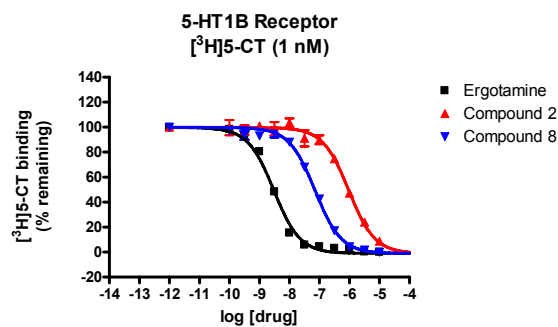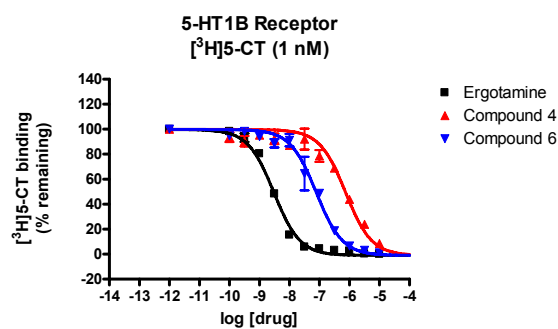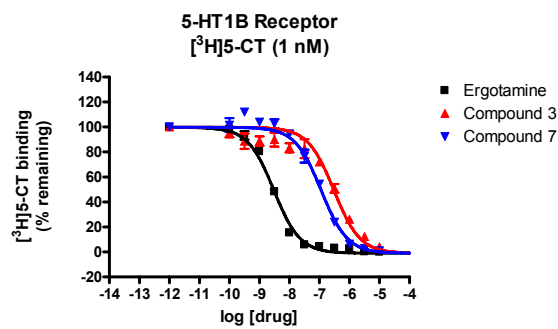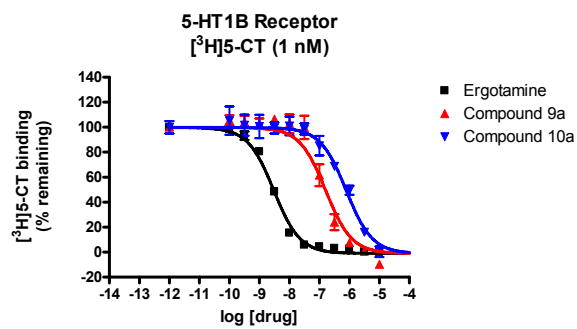

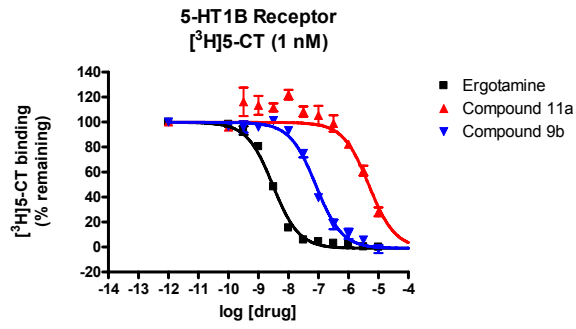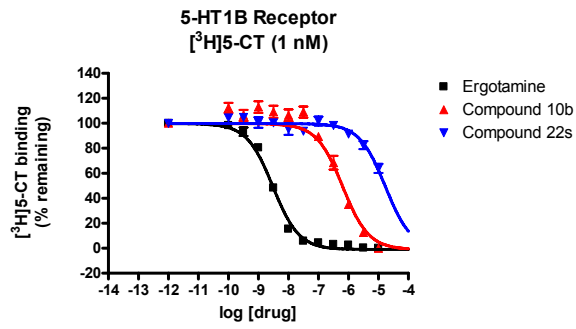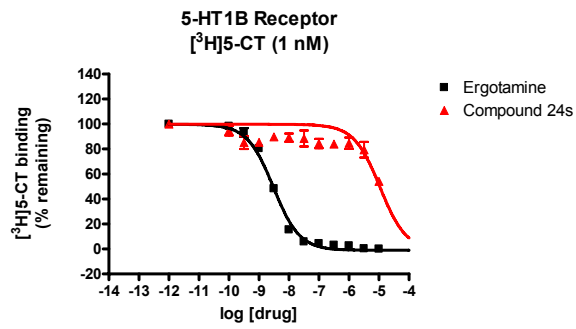

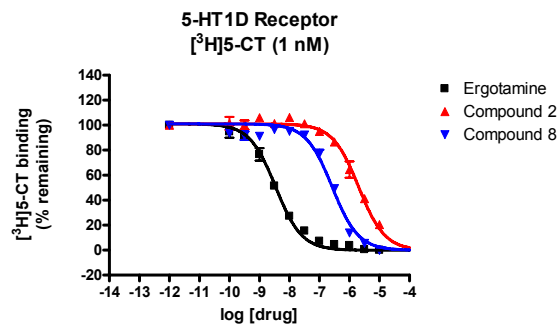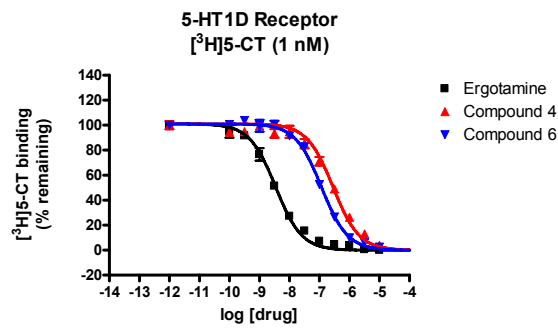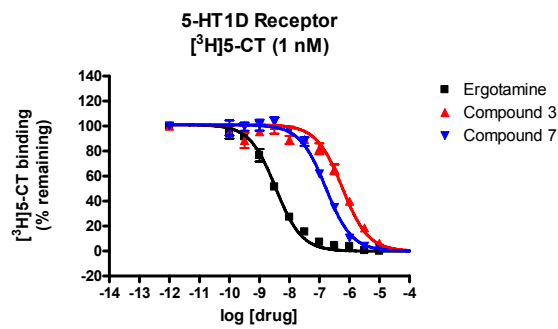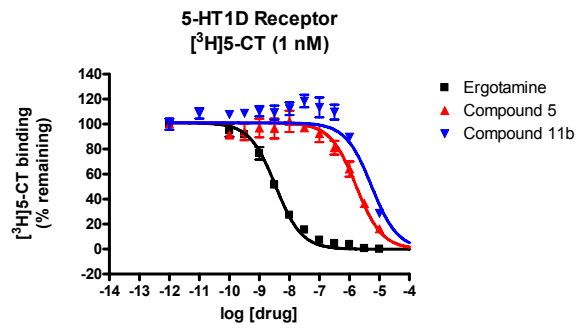

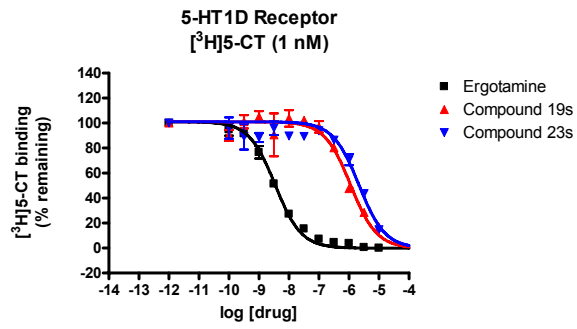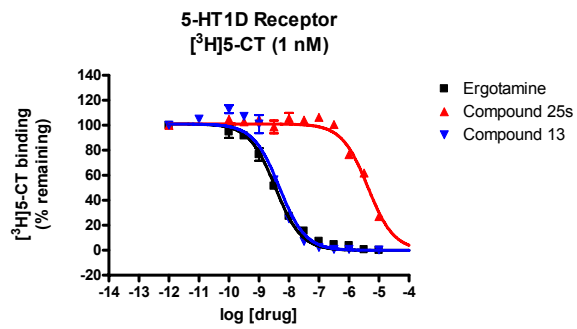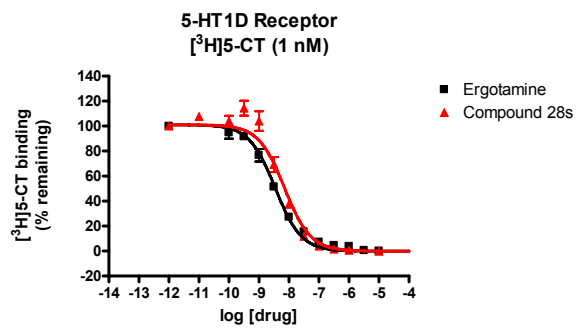

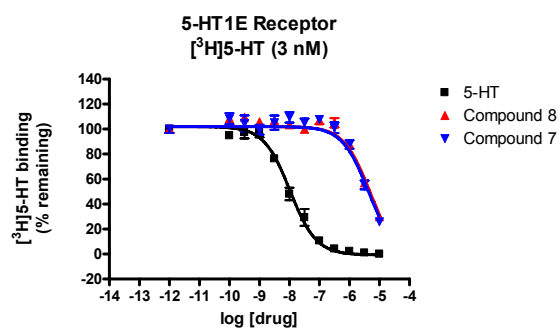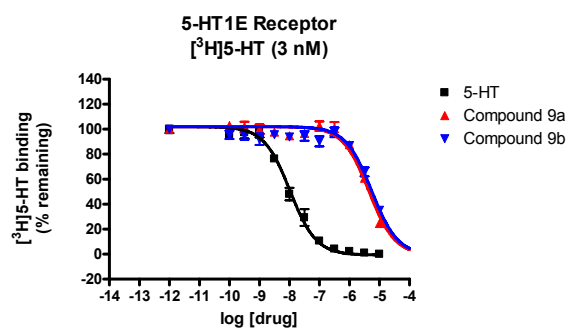

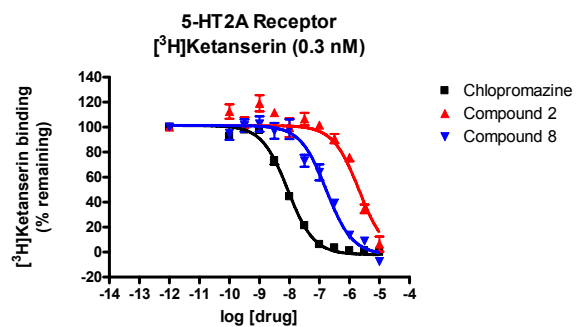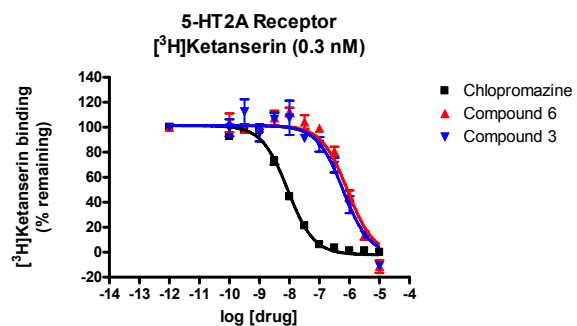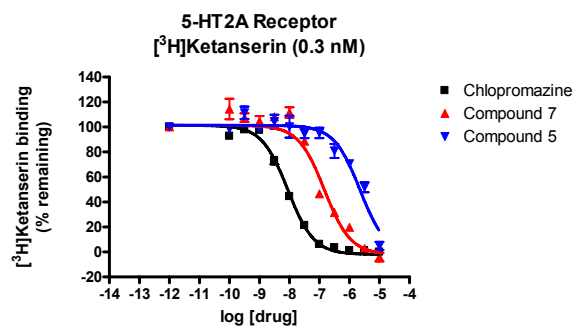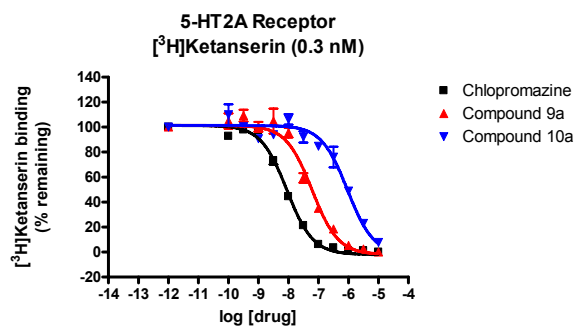

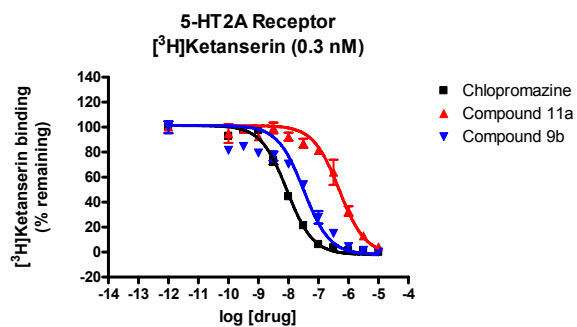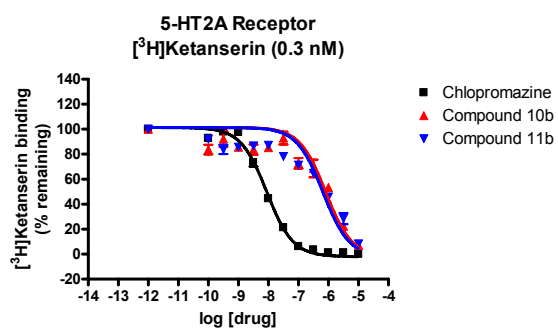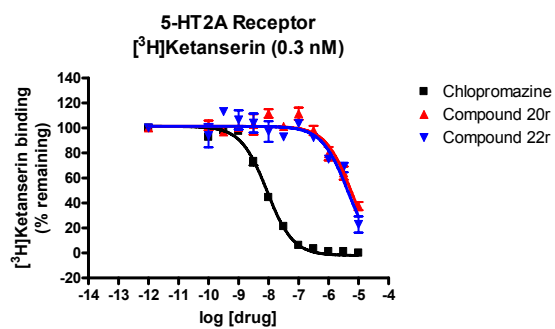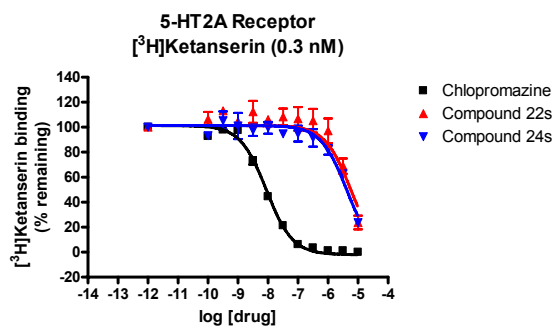



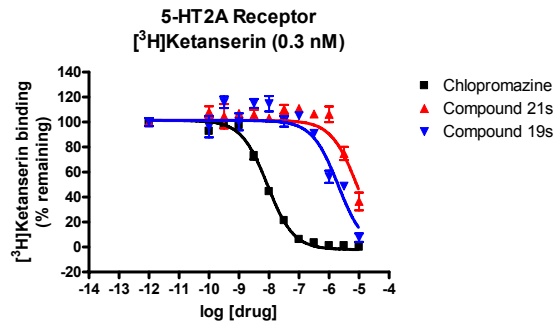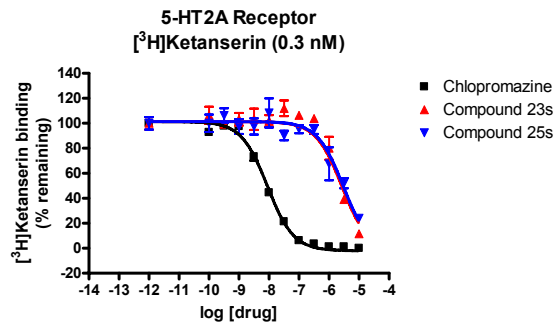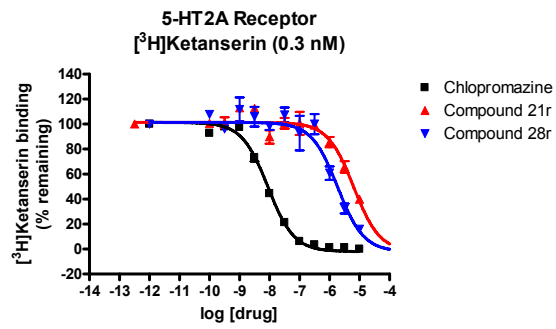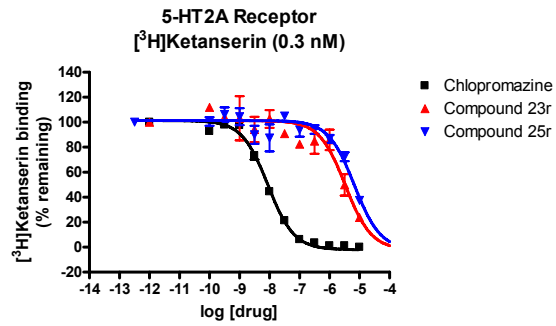

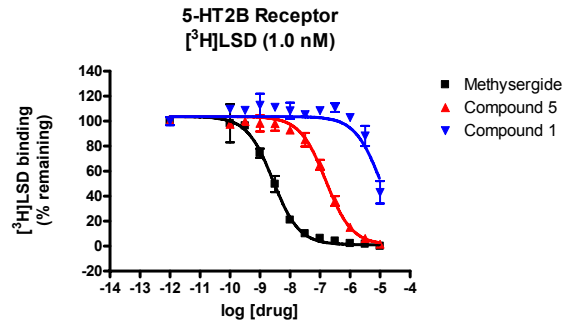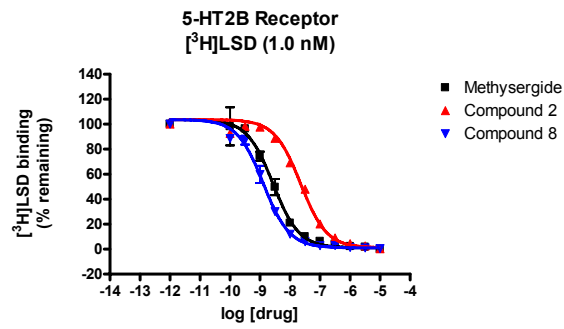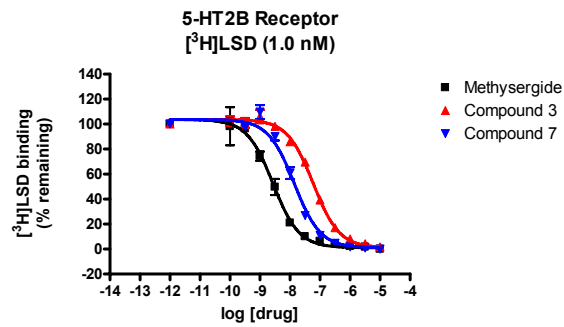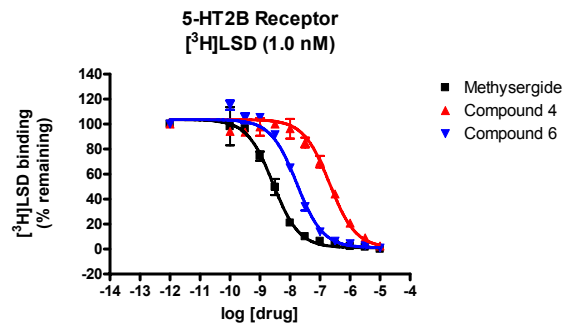

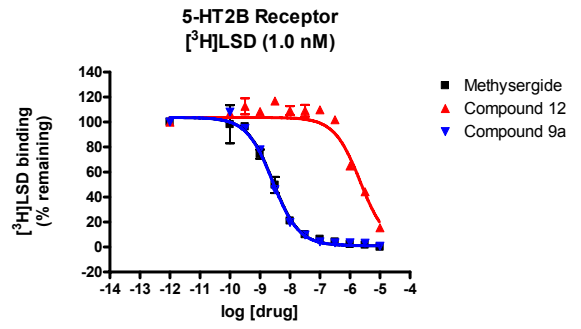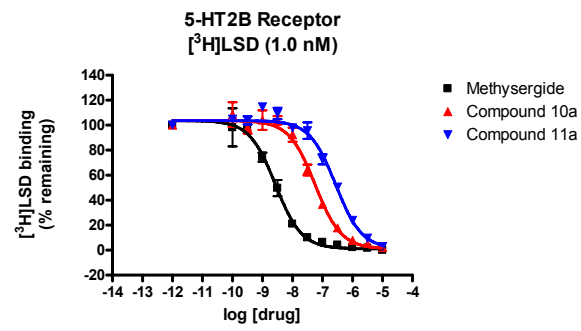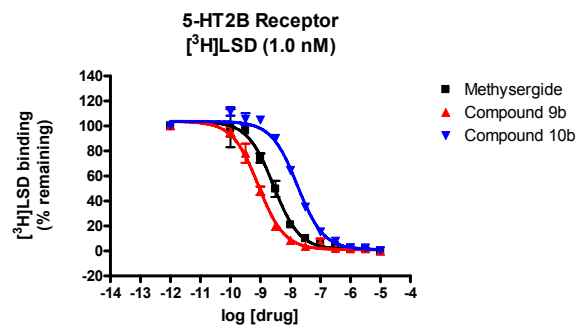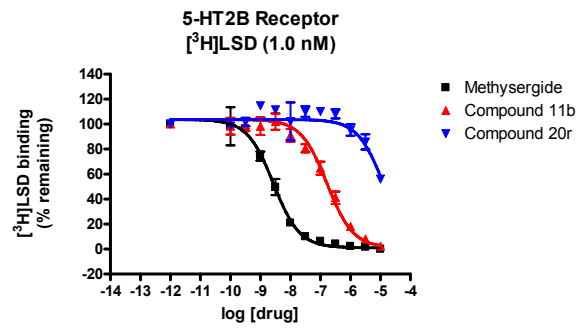

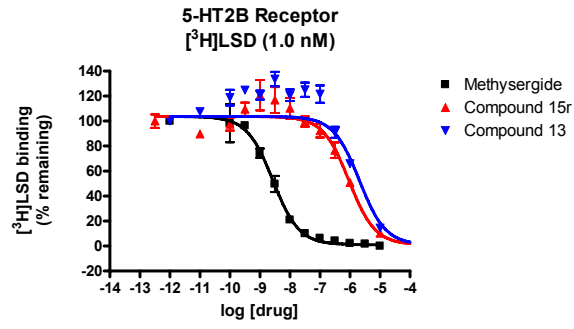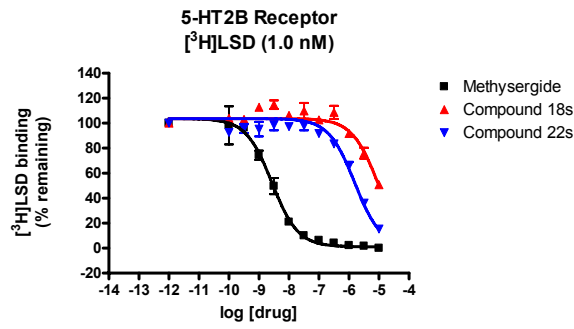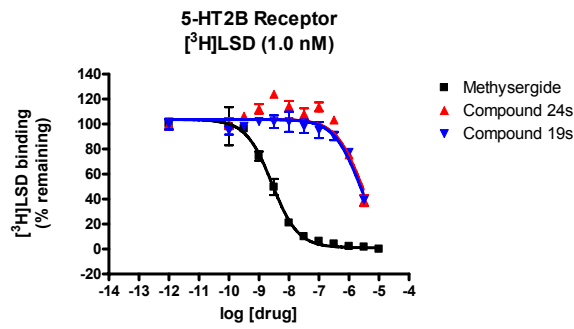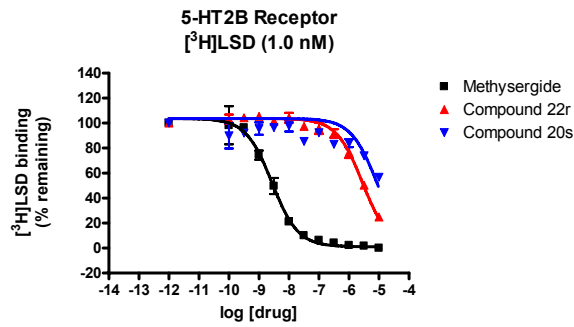

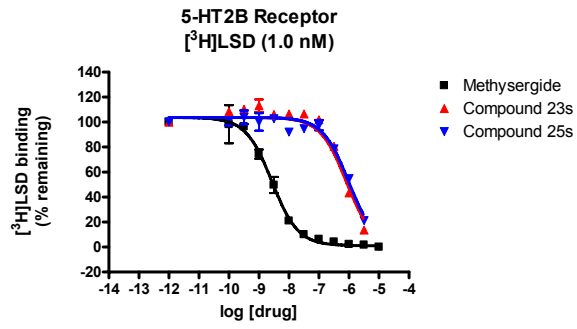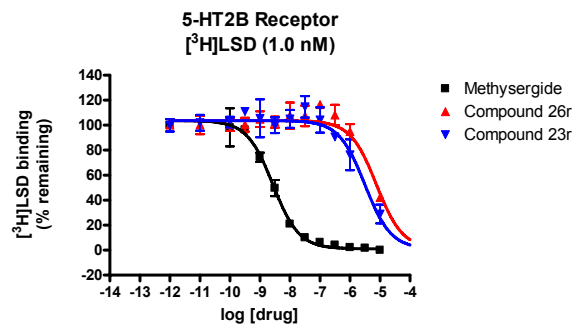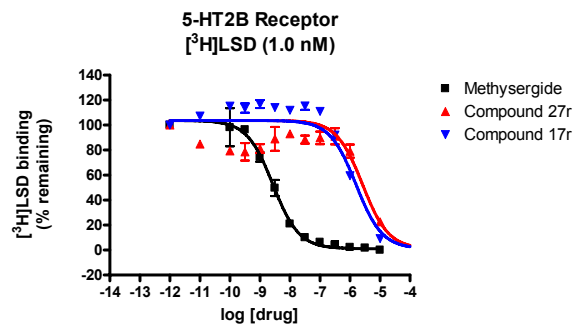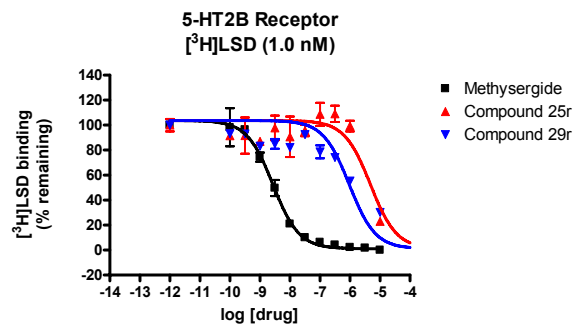

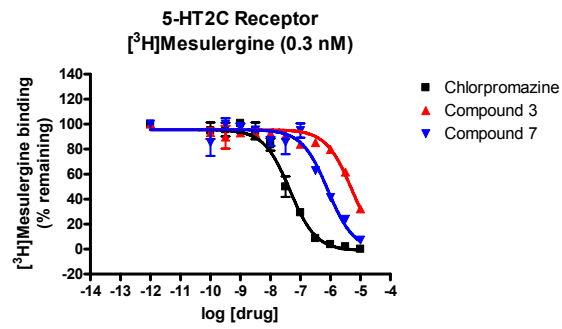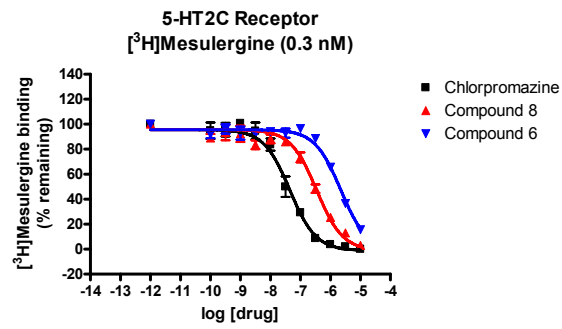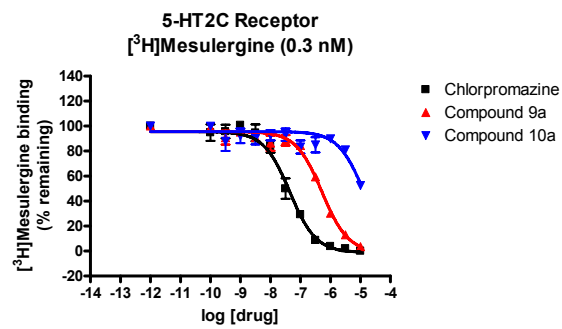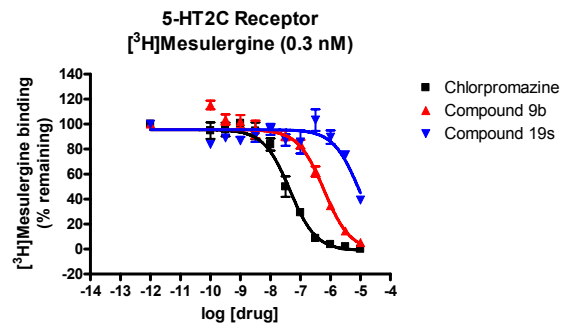

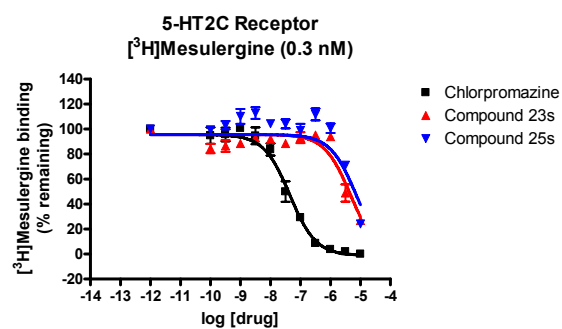

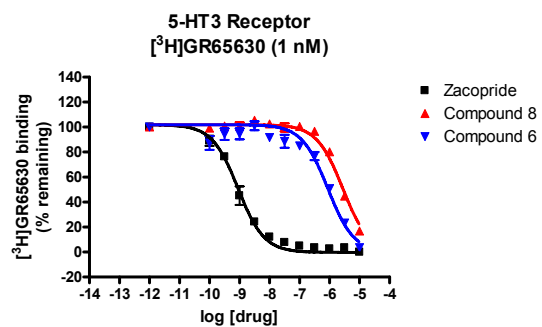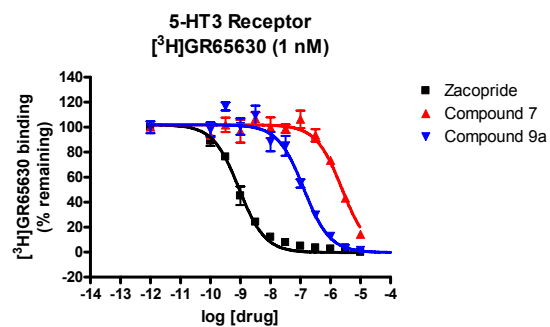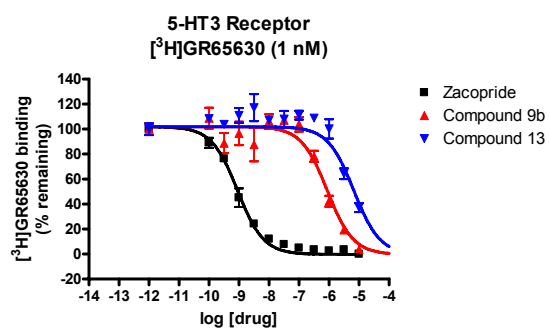



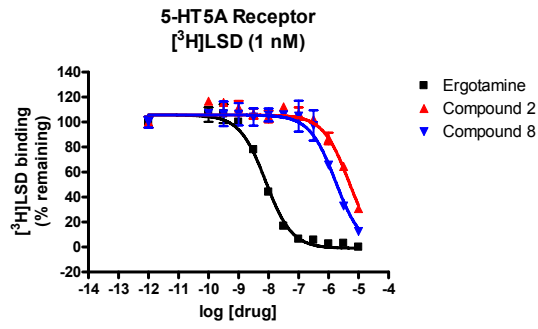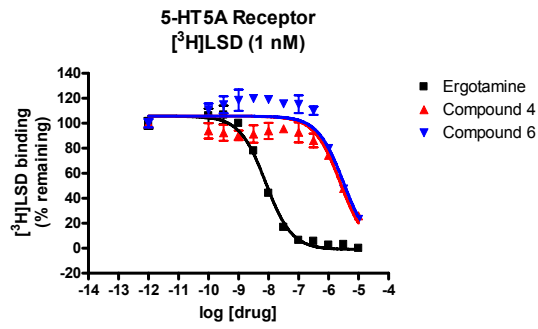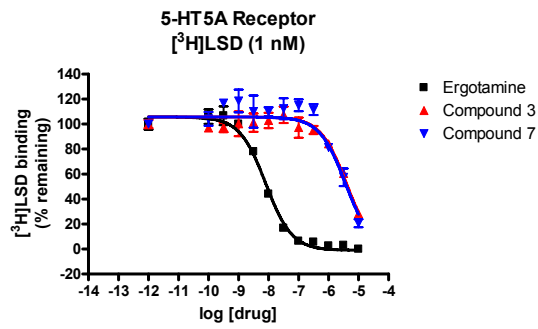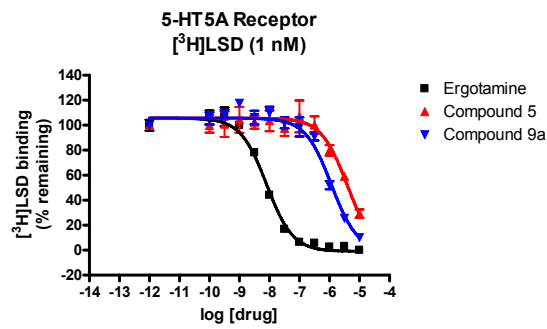

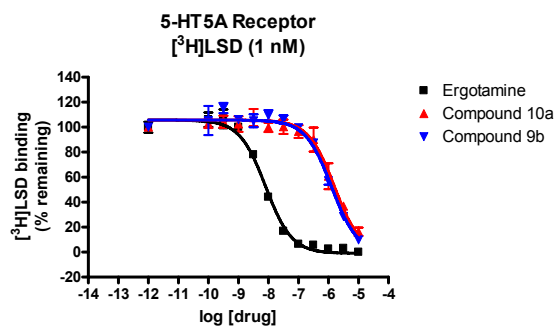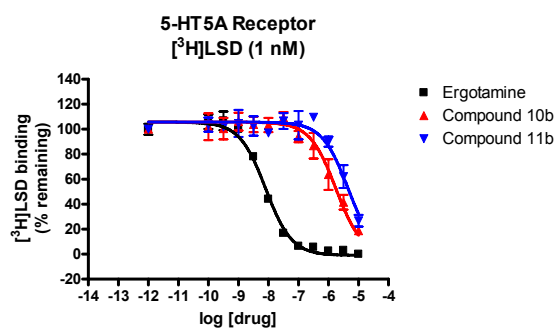

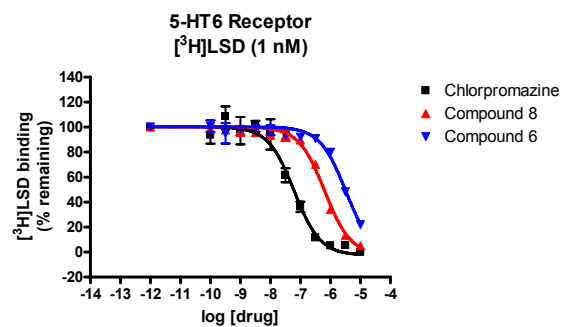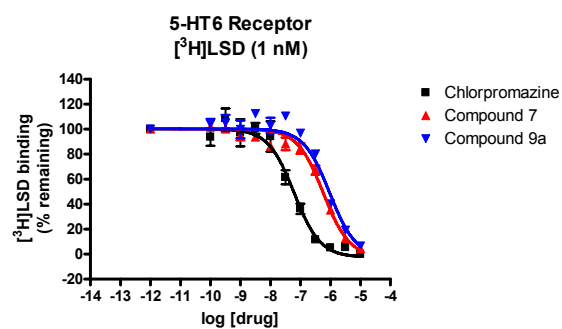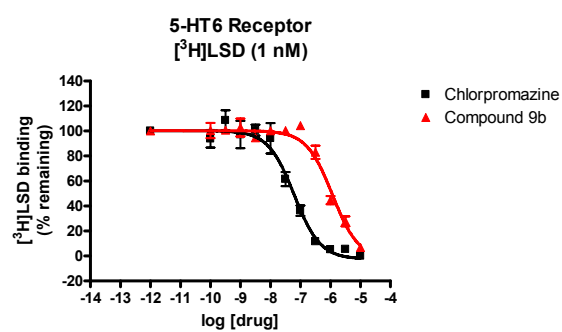

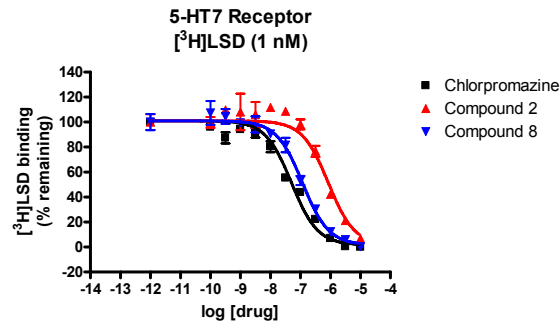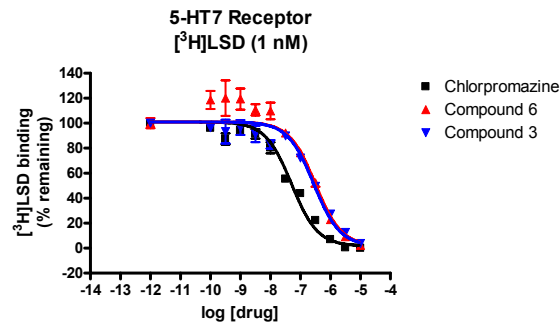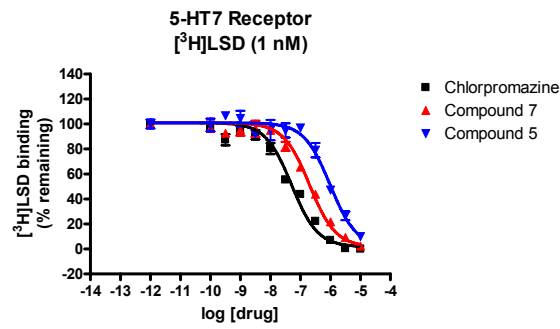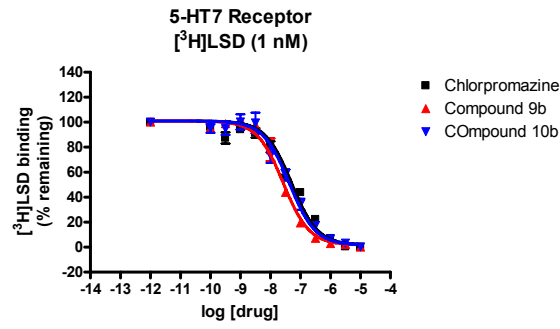

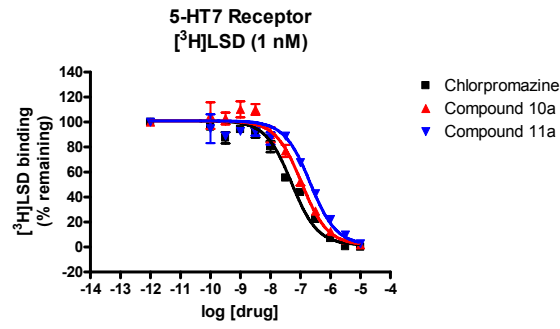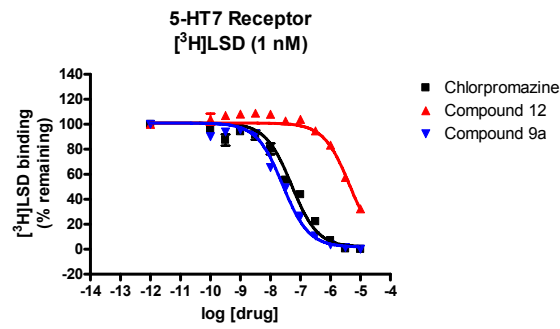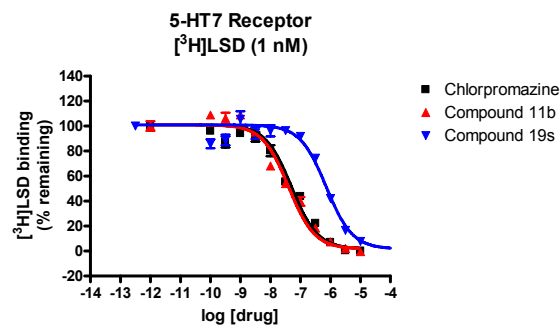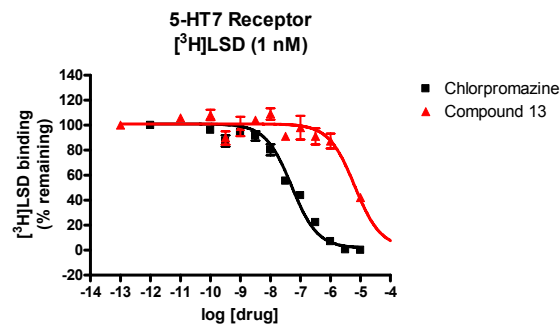

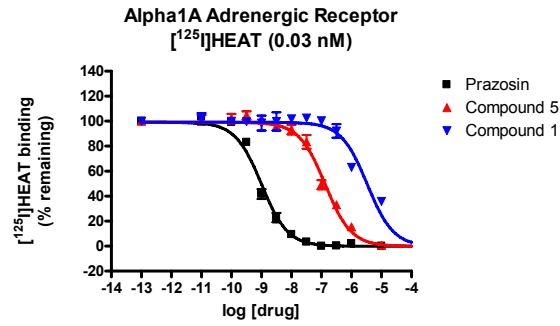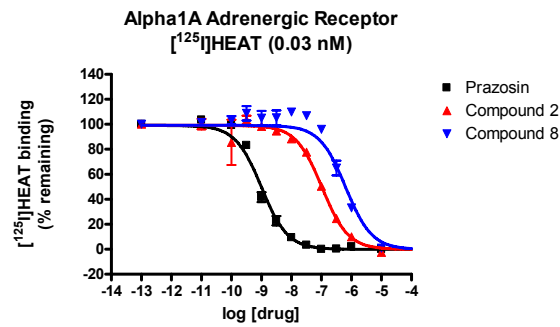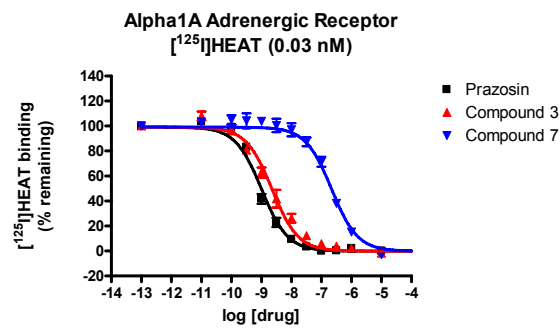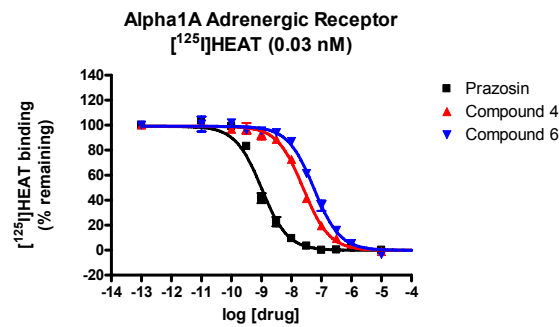

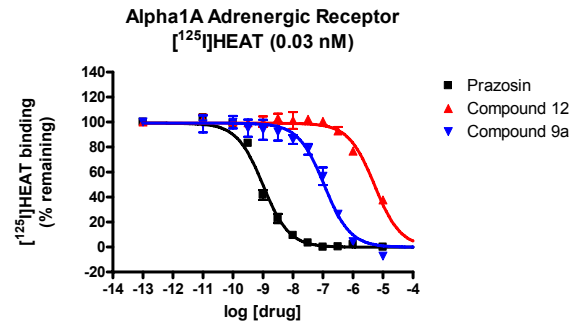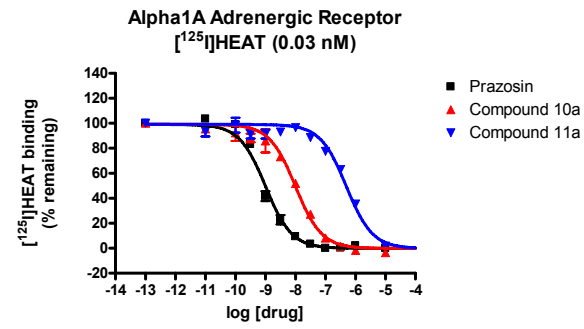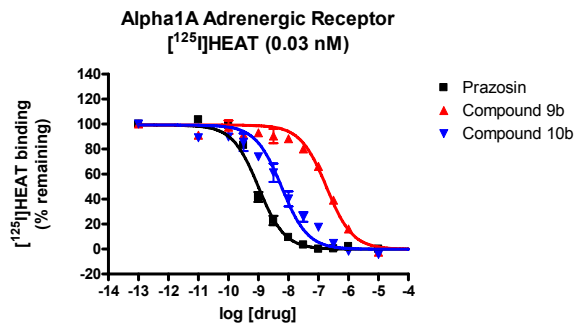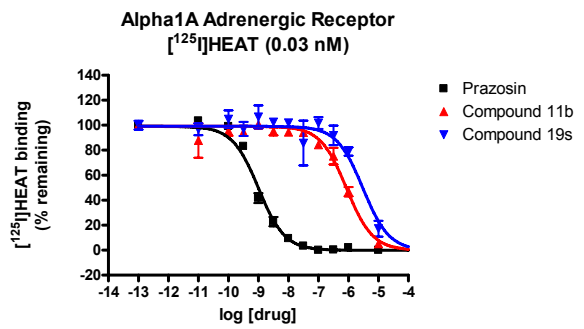

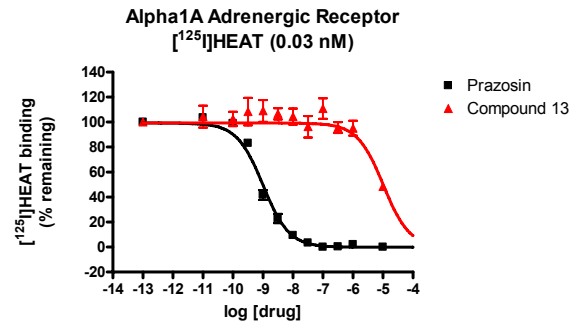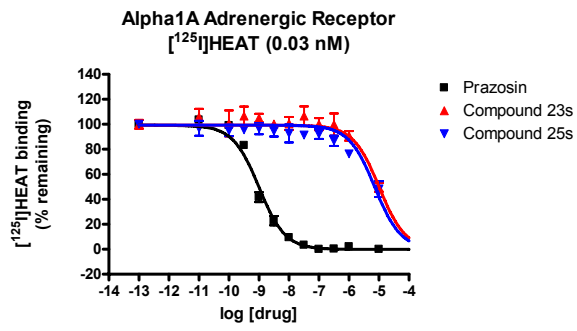



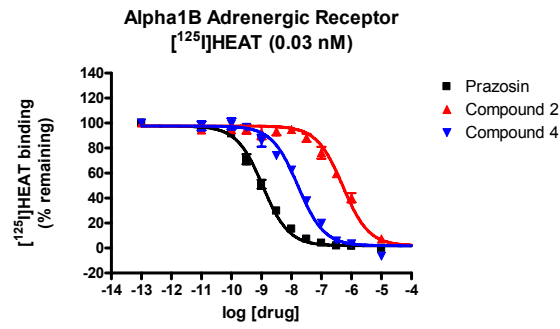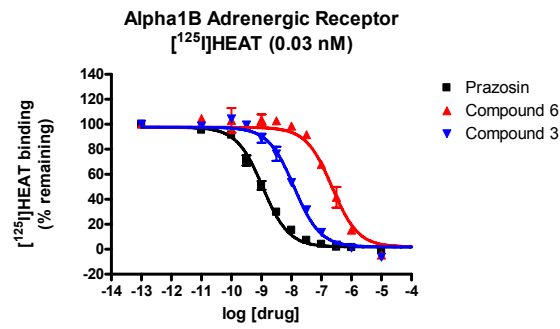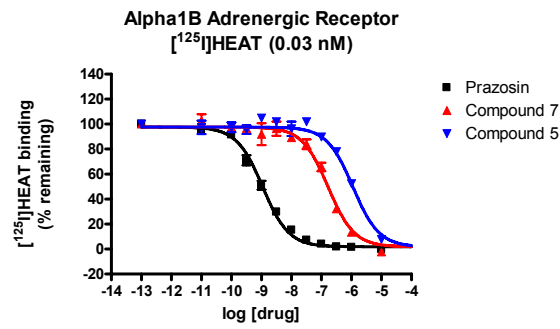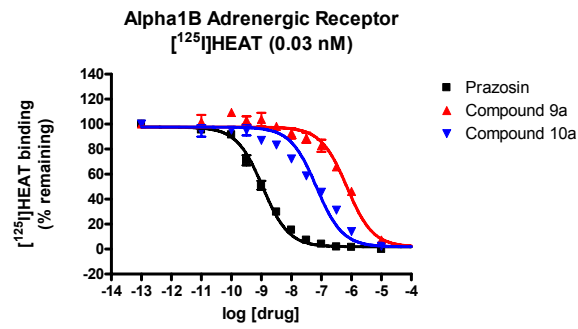

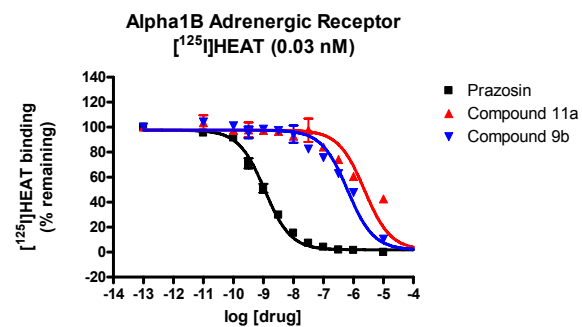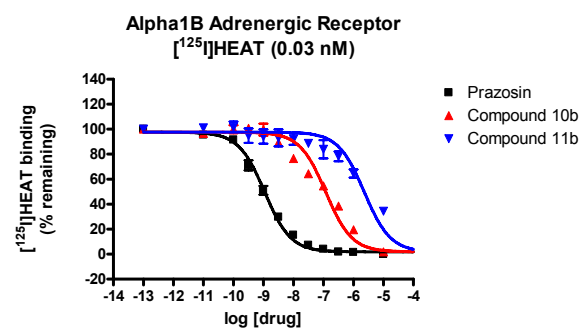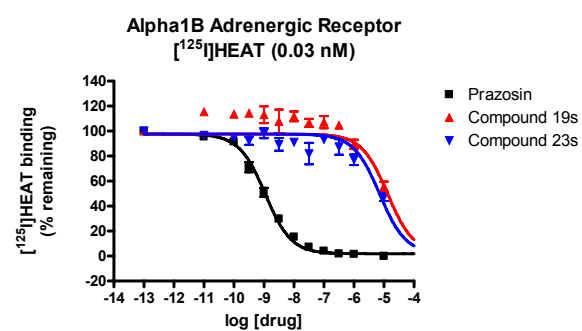

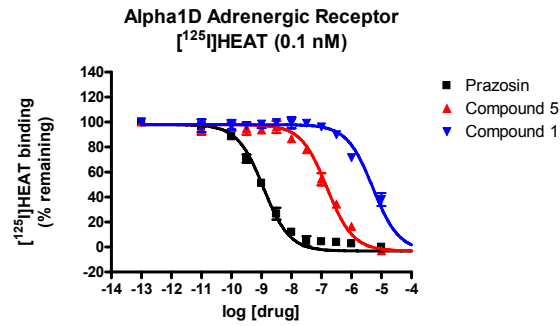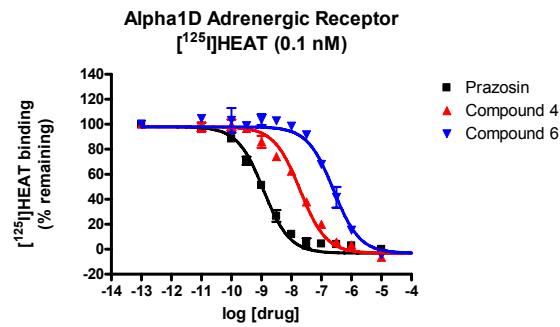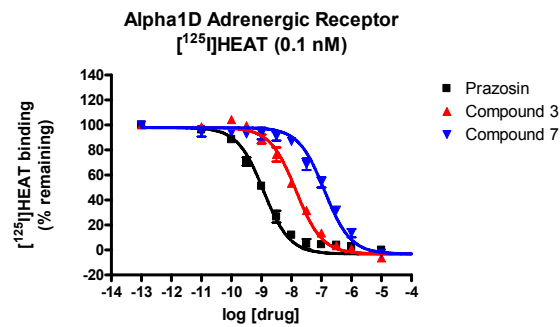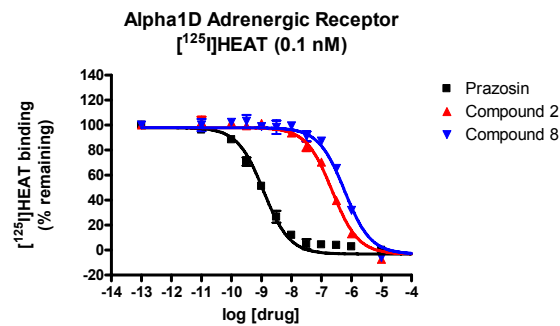

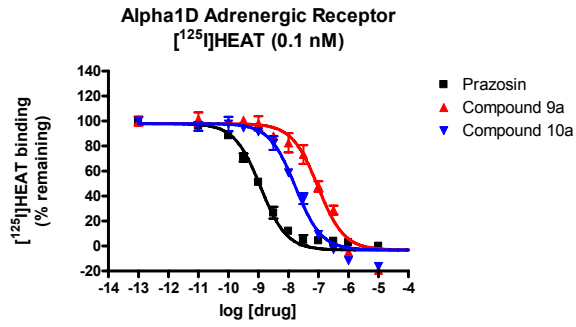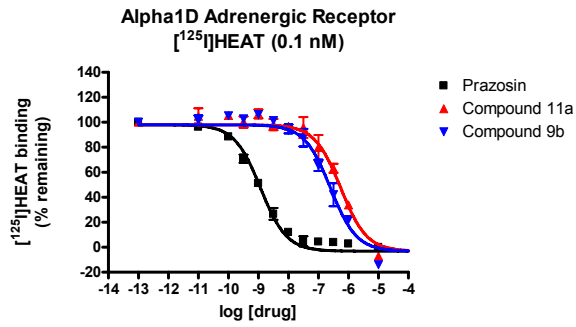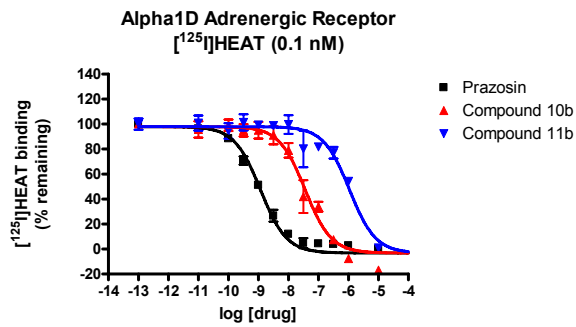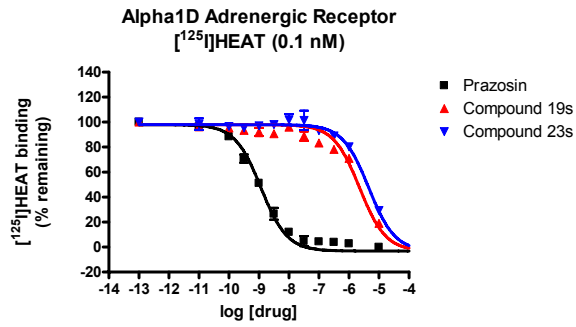

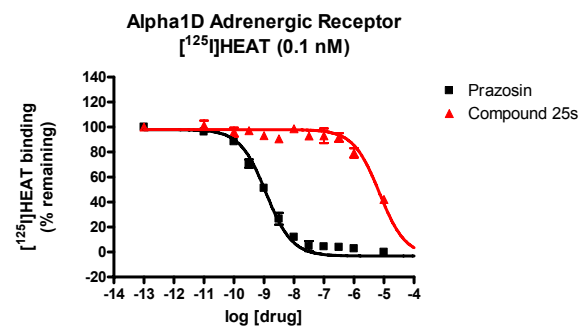

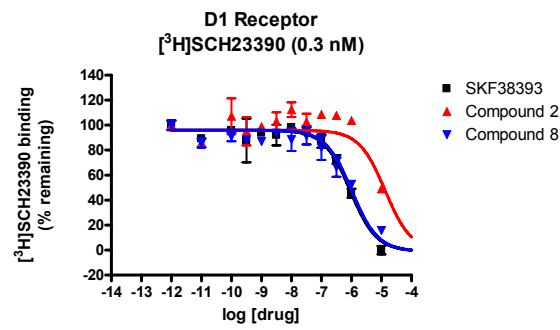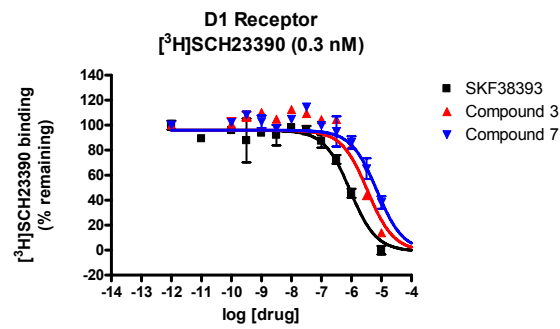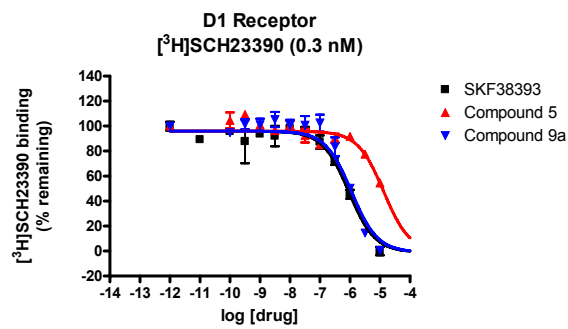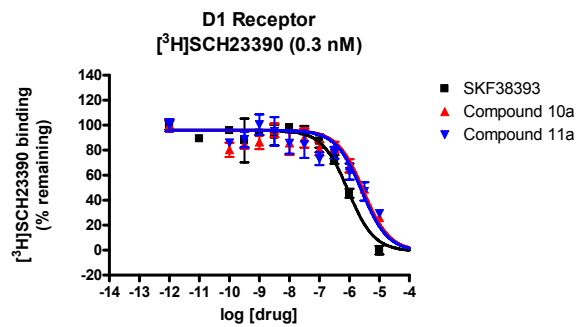

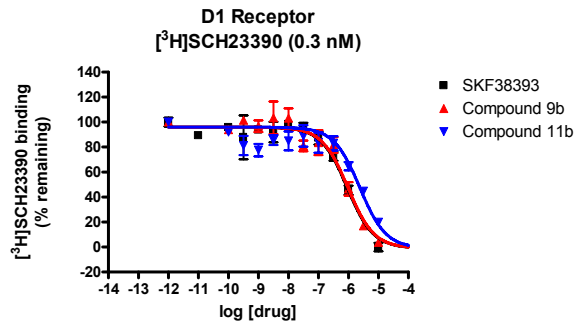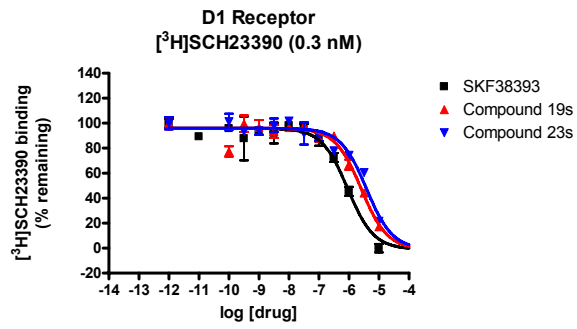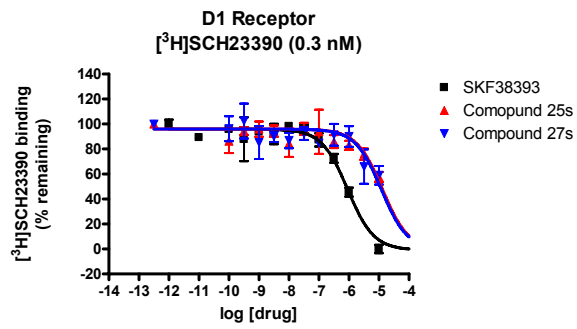

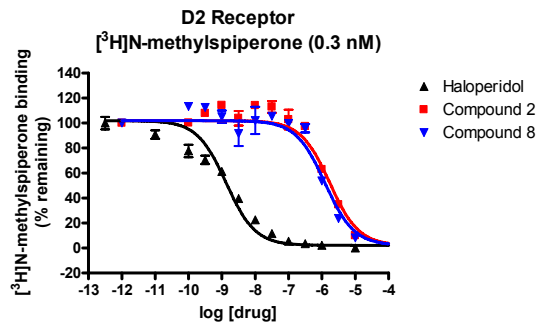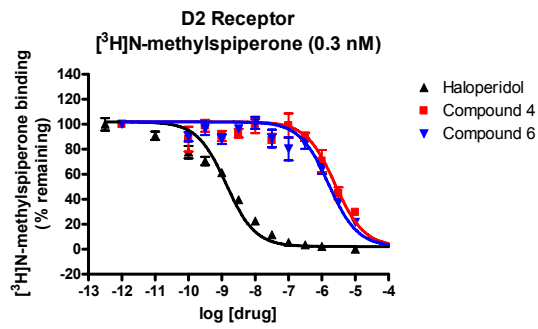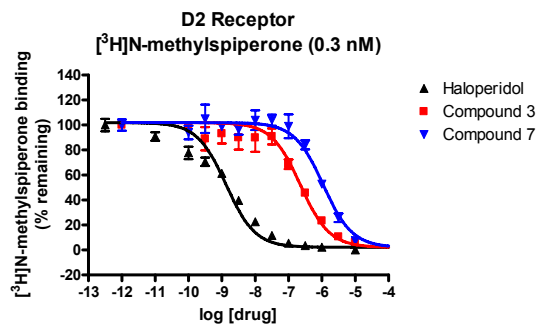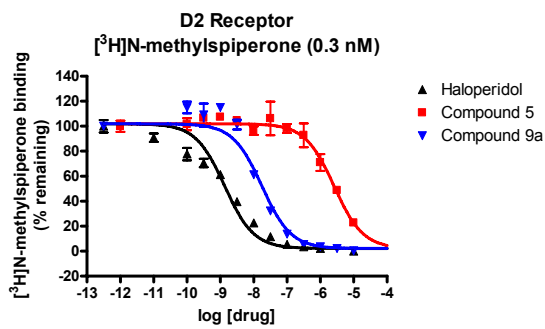



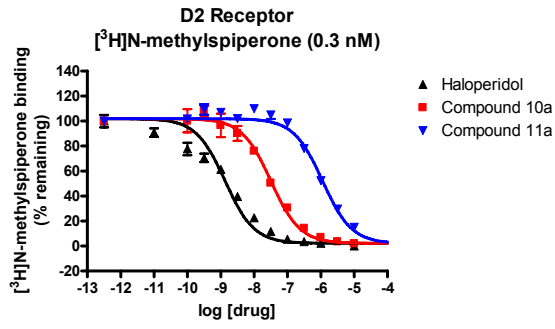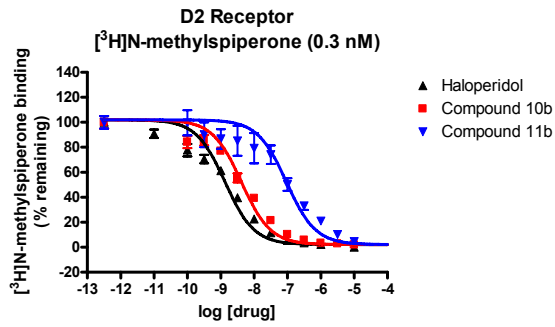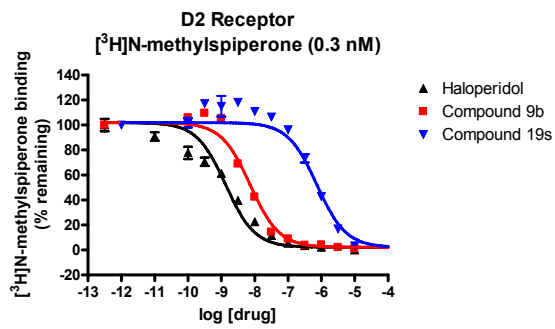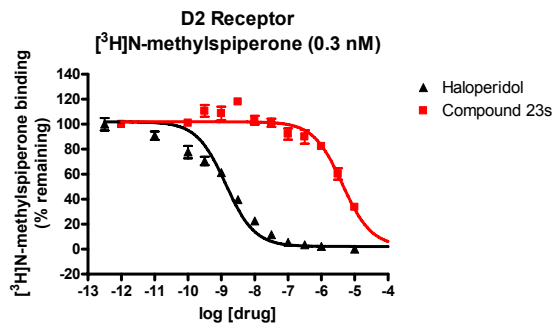

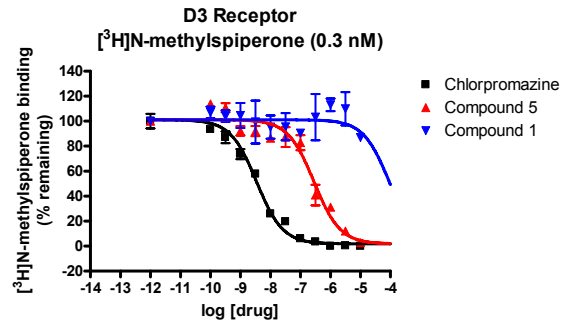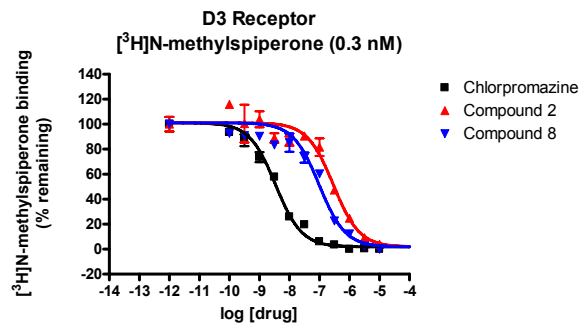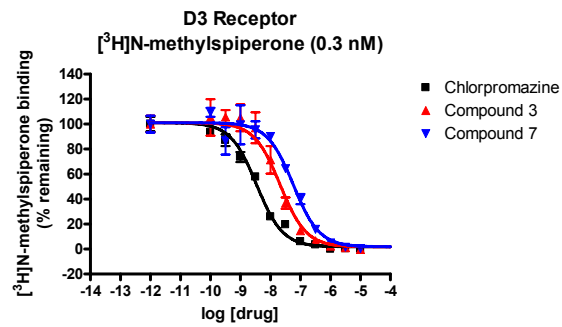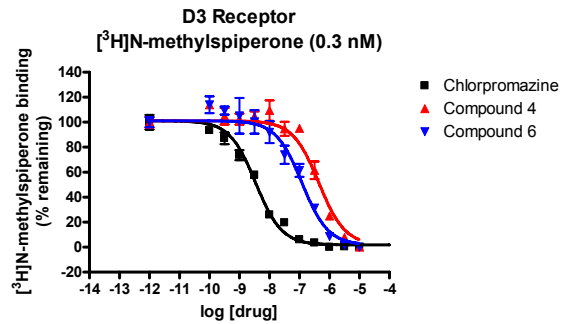

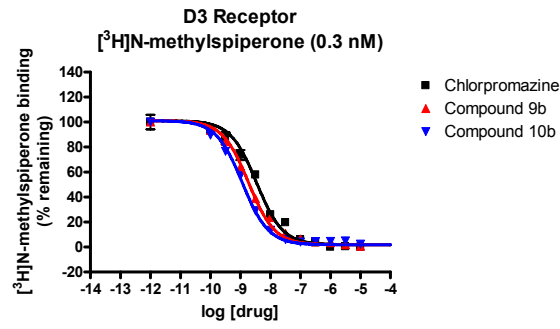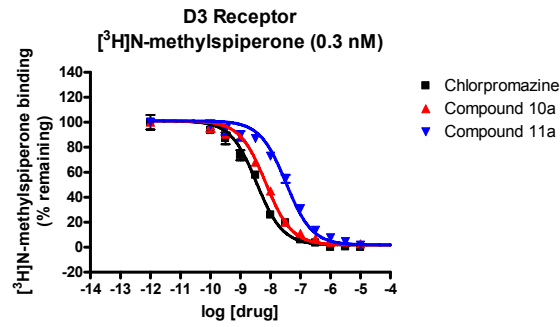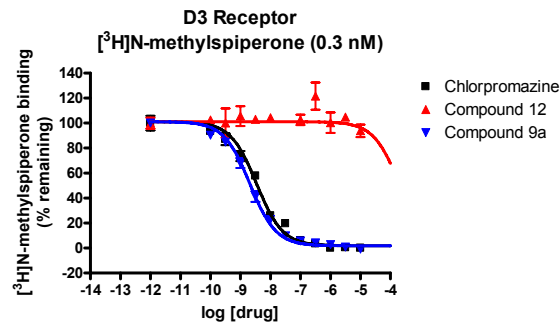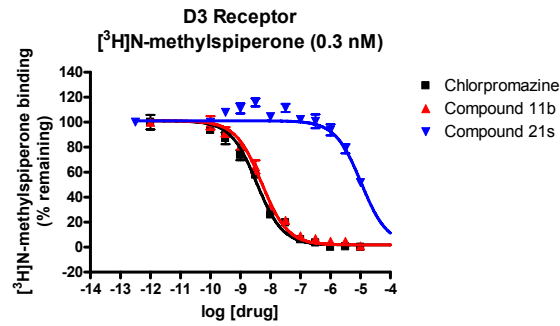

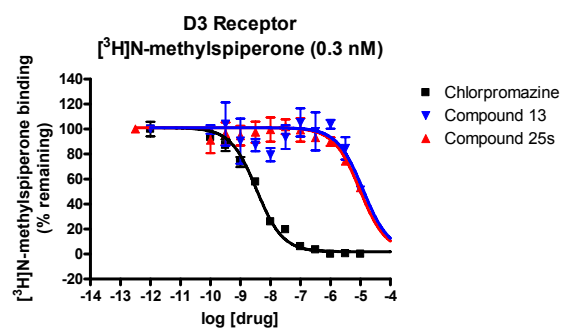

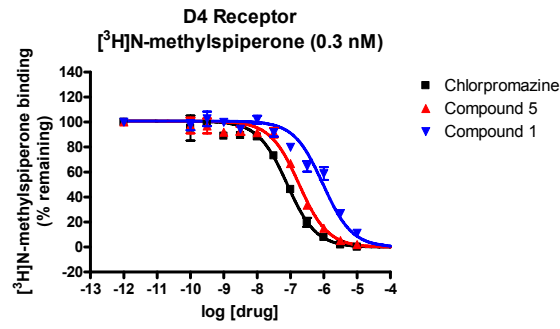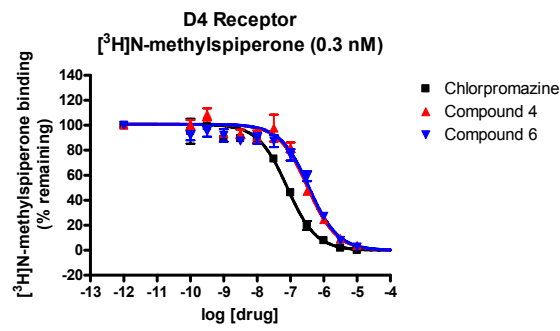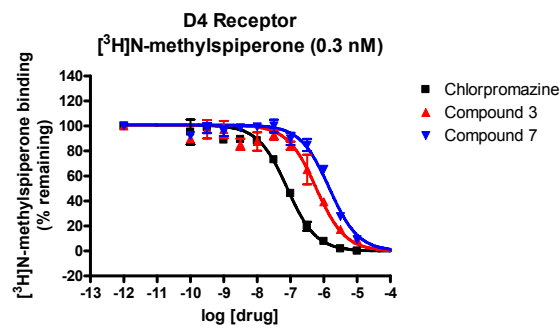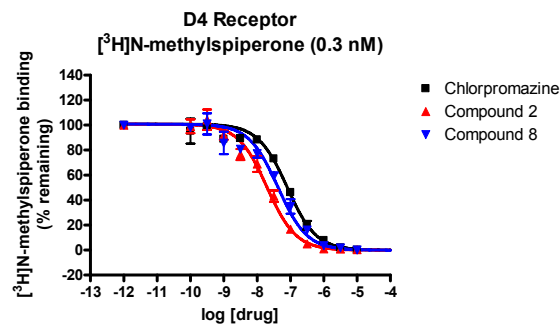

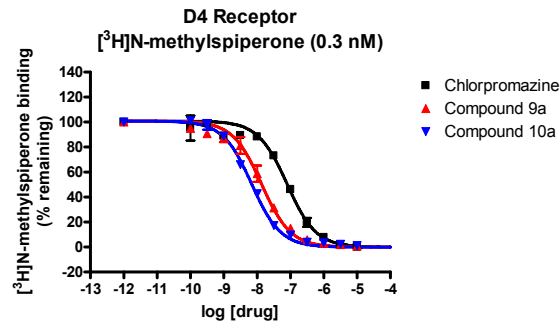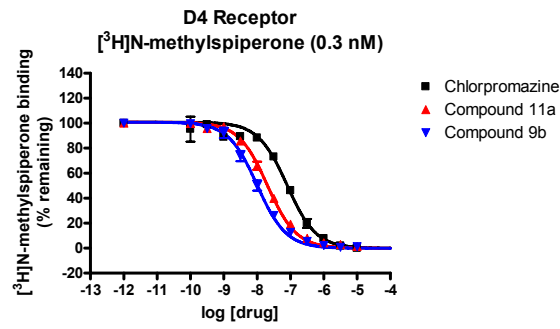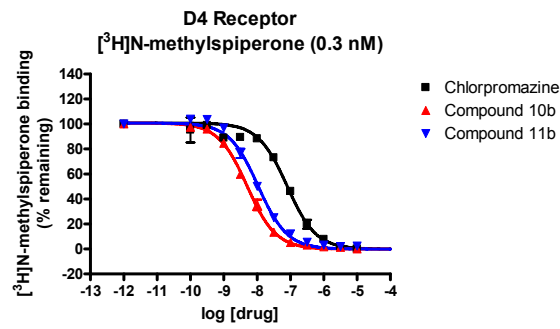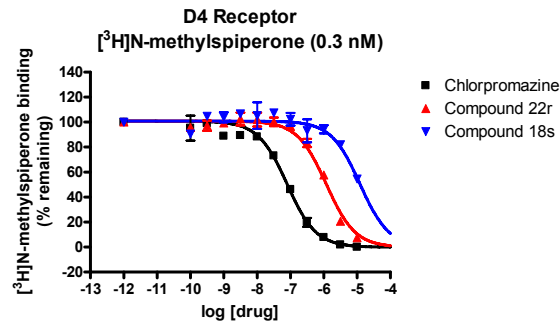

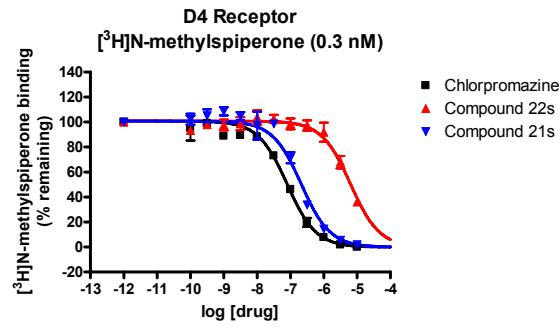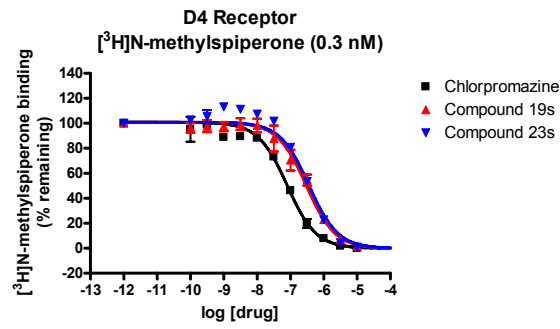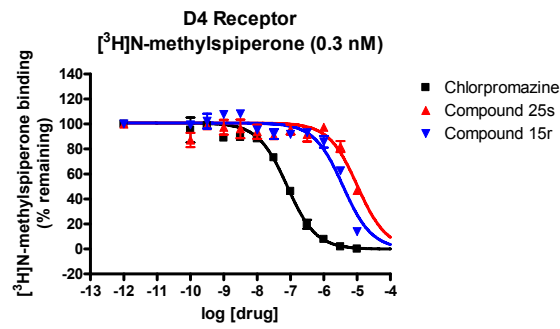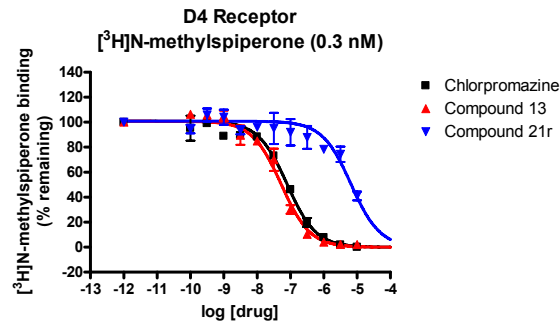

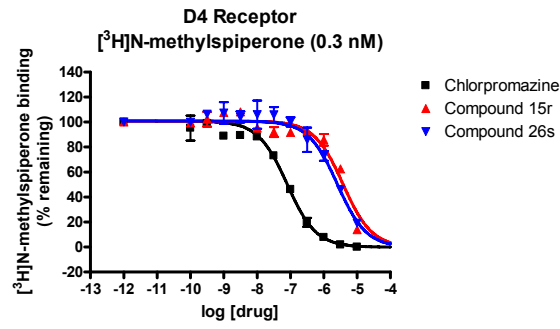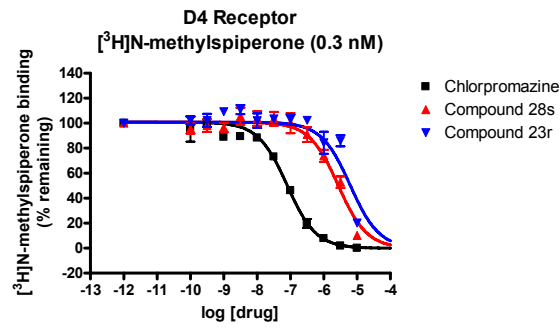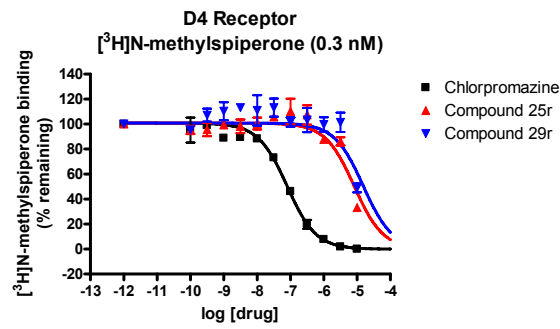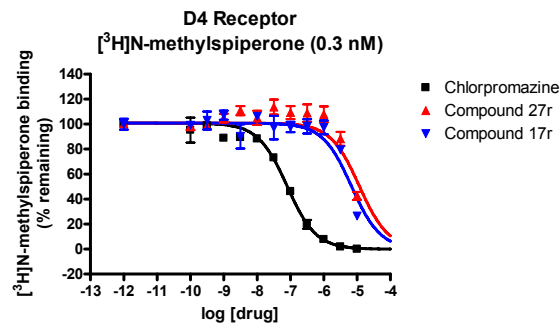



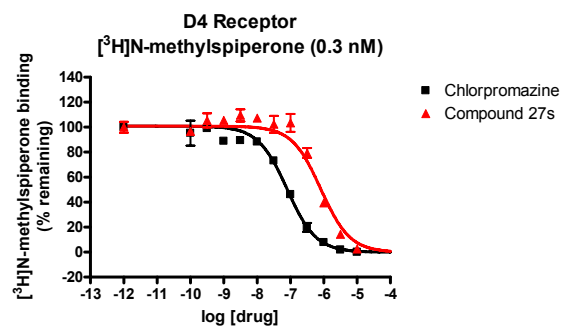

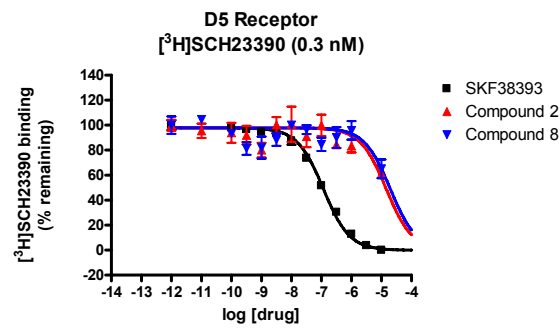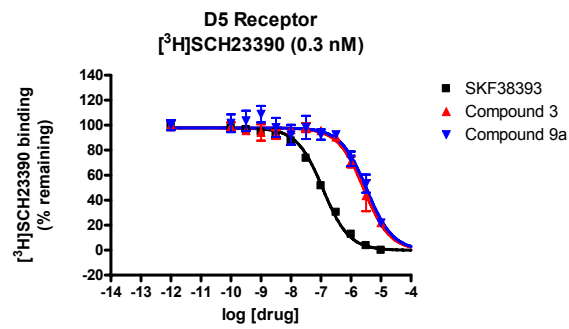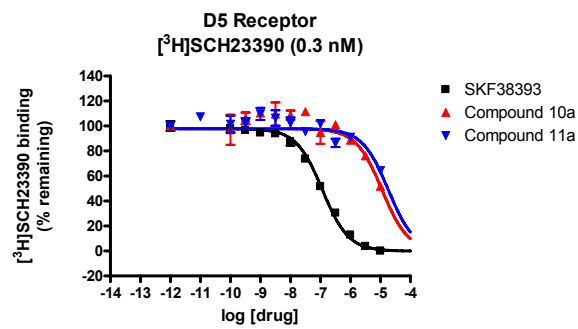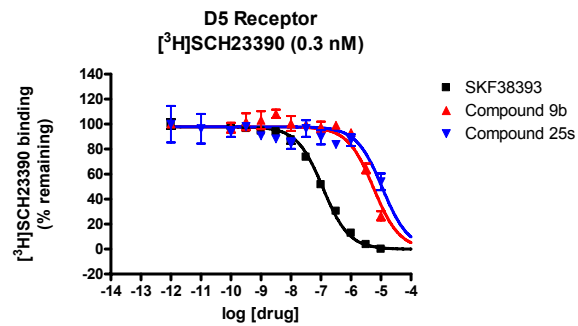

### Supplementary Figure 3: Experimental testing of ligand function

**Figure 3A:** Dopamine receptor D2 and D4 agonist assays for compounds 1, 3, 13, 22r and the drug chlorpromazine (CPZ). A control assay is also performed.

Quinpirole is used as standard in the assays, for D2 agonist,  $pXC_{50} = 8.182$  (SE = 0.089) and for D4 agonist,  $pXC_{50} = 8.348$  (SE = 0.094).

**Figure 3B:** Comparison for dopamine D2 and D4 on agonist and antagonist functional assays for compounds 1, 3, 13, 22r and the drug chlorpromazine (CPZ). A control agonist assay is performed in the absence of dopamine receptor in order to assess whether the agonist activity is non-specific (Glo agonist assay).

Quinpirole is used as standard in the assays, for D2 agonist,  $\log EC_{50} = -8.7$  (SE = 0.1), D4 agonist,  $\log EC_{50} = -8.6$  (SE = 0.1), and no activity on the D2 and D4 antagonist assays.

**Figure 3C:** 5-HT<sub>2B</sub> Ca mobilization functional assay (with FLIPR) for compounds 15r and 23s.

**Figure 3D:** hERG inhibition by PatchXpress (electrophysiology) assay for compounds 2, 11a, 11b, 15r, 19s, 21s, 22r, 12s and 27s.

**Figure 3A:** Dopamine receptor D2 and D4 agonist assays

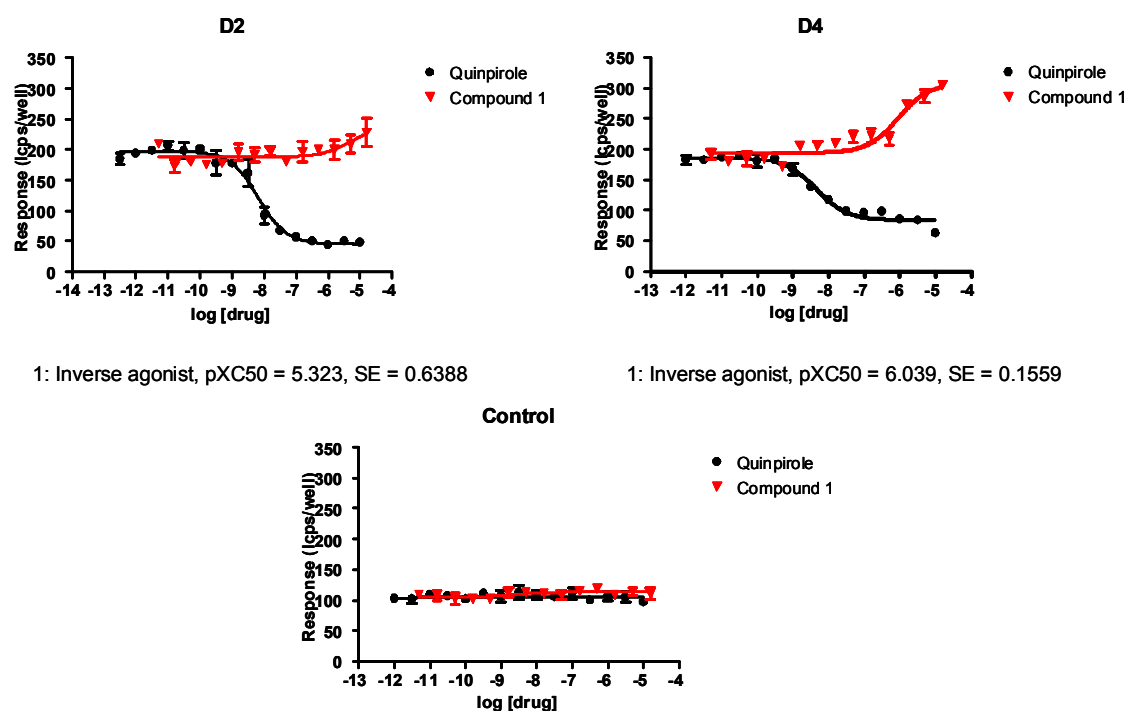

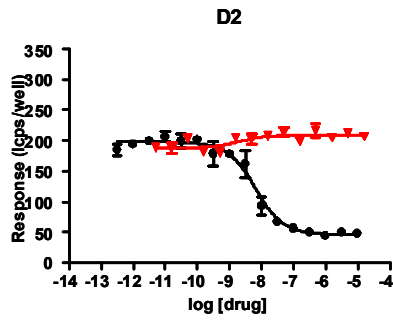

3: Inverse agonist, pXC50 = 6.702, SE = 0.388

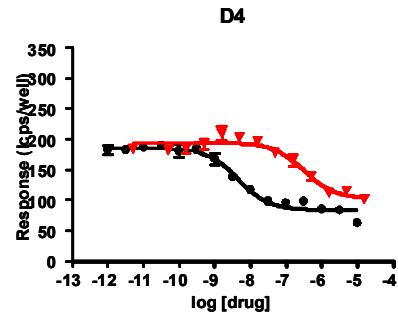

3: Agonist, pXC50 = 8.254, SE = 0.3003

Control

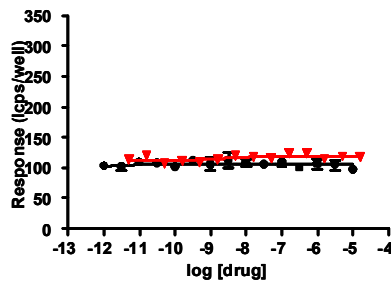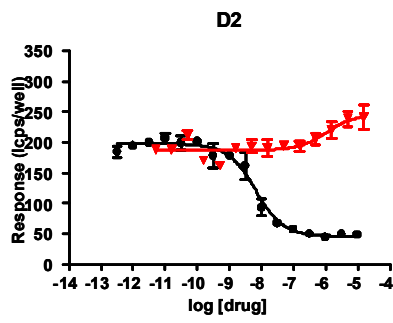

13: Inverse agonist, pXC50 = 5.952, SE = 0.3303

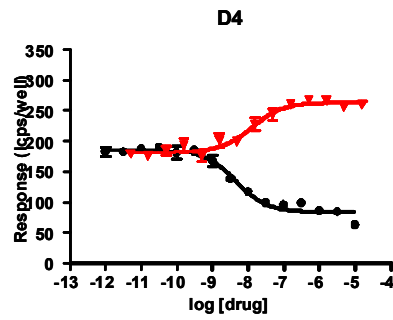

13: Inverse agonist, pXC50 = 7.884, SE = 0.1276

Control

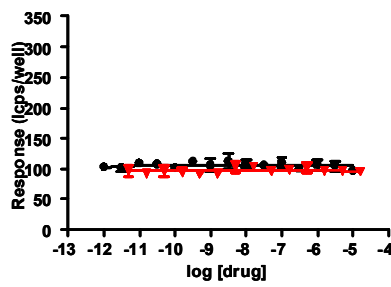

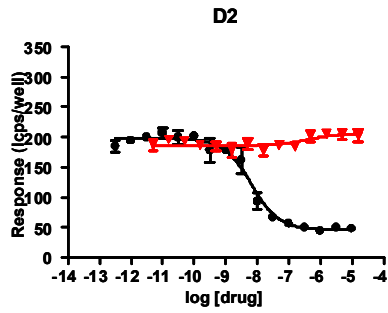

22r: Inverse agonist,  $pXC50 = 6.371$ ,  $SE = 0.6079$

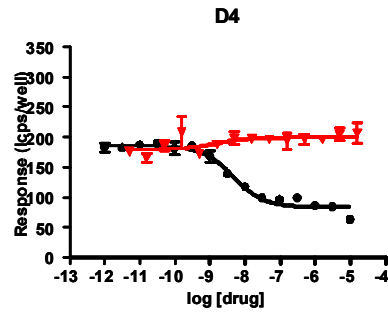

22r: Inverse agonist,  $pXC50 = 8.767$ ,  $SE = 0.8187$

**Control**

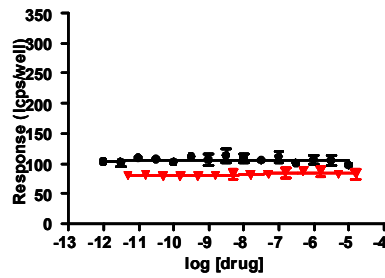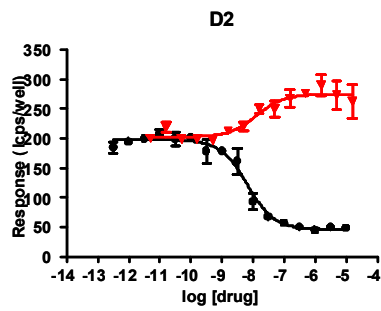

Cpz: Inverse agonist,  $pXC50 = 7.894$ ,  $SE = 0.2445$

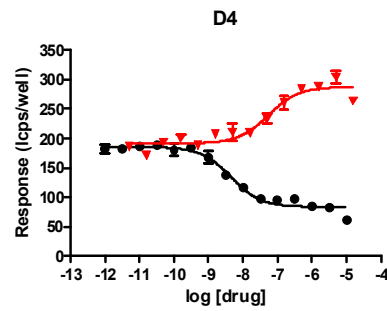

Cpz: Inverse agonist,  $pXC50 = 7.267$ ,  $SE = 0.1421$

**Control**

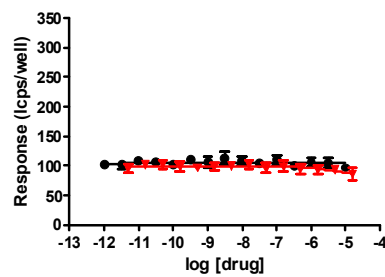

**Figure 3B:** Comparison agonist, antagonist for D2 and D4 receptors

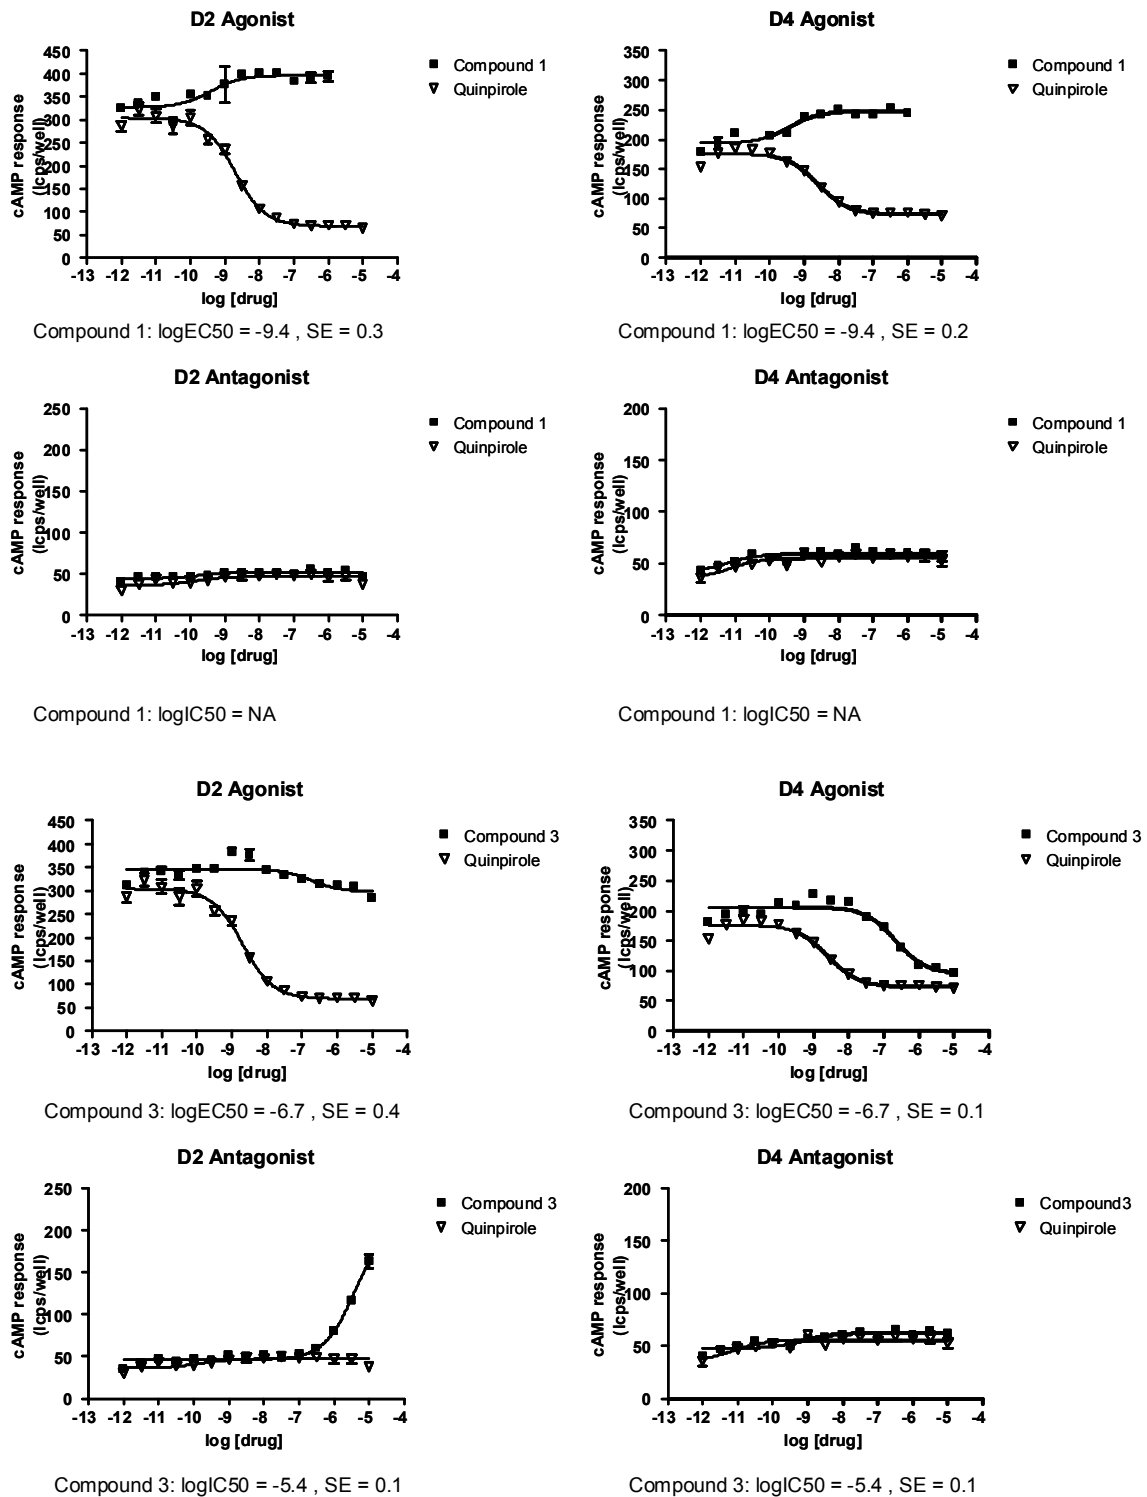

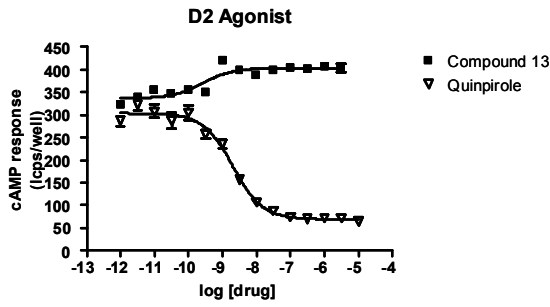

Compound 13: logEC50 = -9.6, SE = 0.2

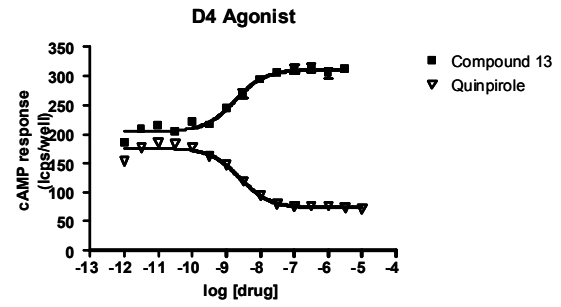

Compound 13: logEC50 = -8.7, SE = 0.1

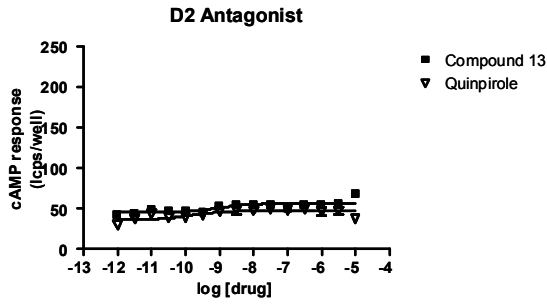

Compound 13: logIC50 = NA

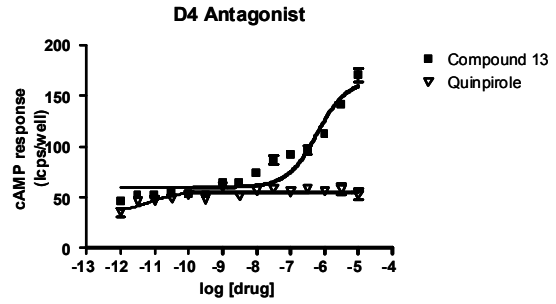

Compound 13: logIC50 = -6.2, SE = 0.1

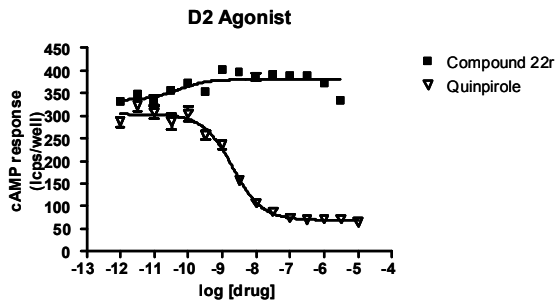

Compound 22r: logEC50 = -10.3, SE = 0.4

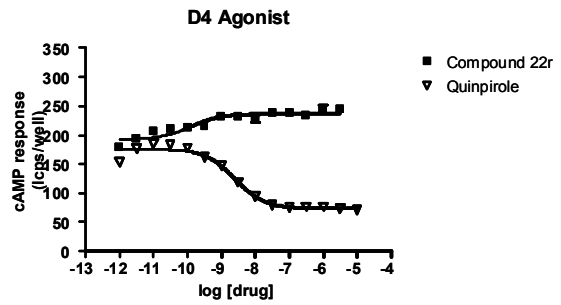

Compound 22r: logEC50 = -9.9, SE = 0.2

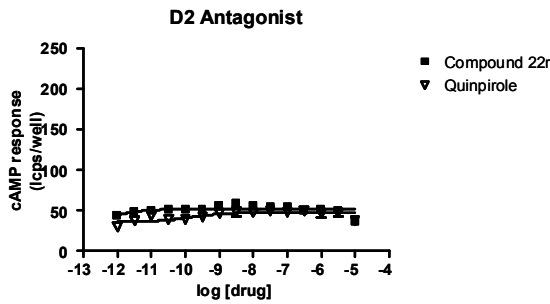

Compound 22r: logIC50 = NA

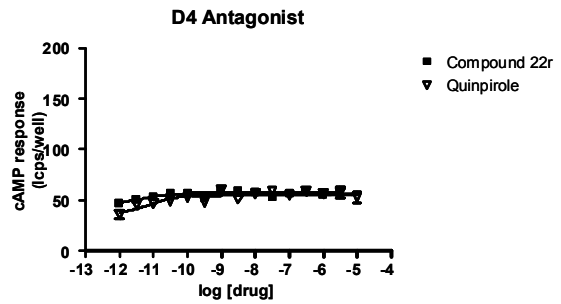

Compound 22r: logIC50 = NA

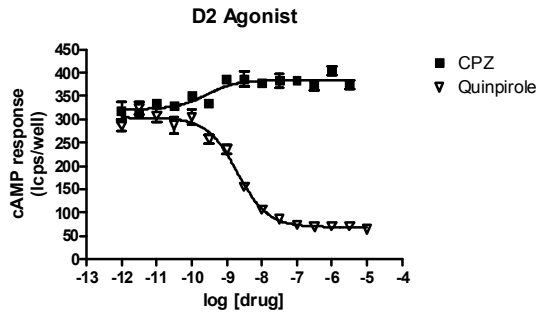

CPZ: logEC50 = -9.6 , SE = 0.3

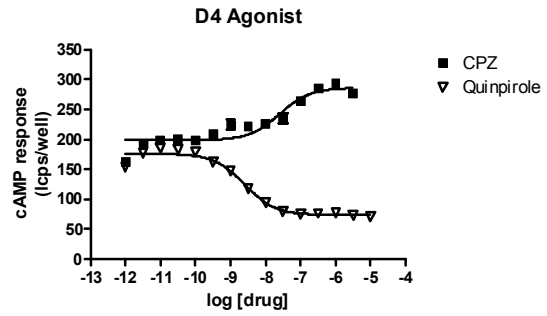

CPZ: logEC50 = -7.6 , SE = 0.2

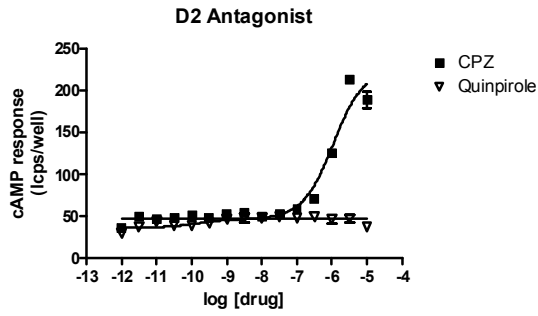

CPZ: logIC50 = -6 , SE = 0.1

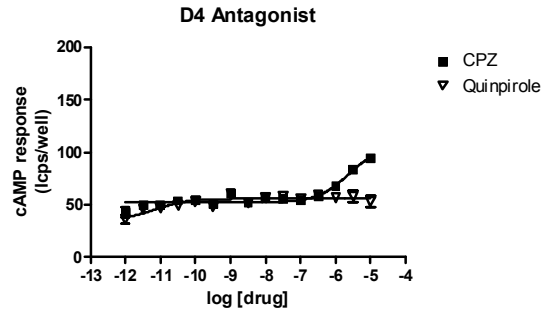

CPZ: logIC50 = -5.6 , SE = 0.1

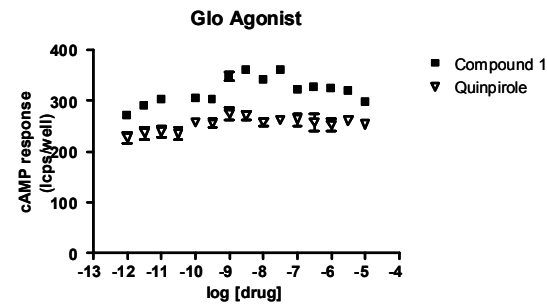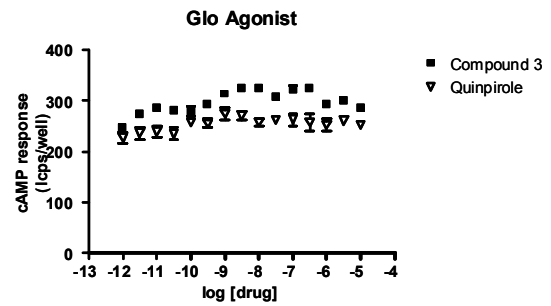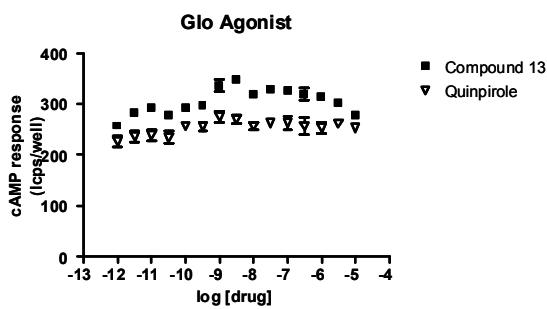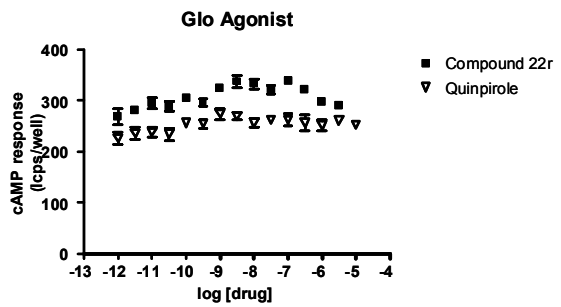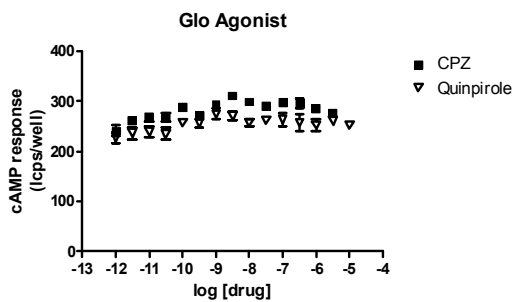



**Figure 3C:** 5-HT<sub>2B</sub> functional assay

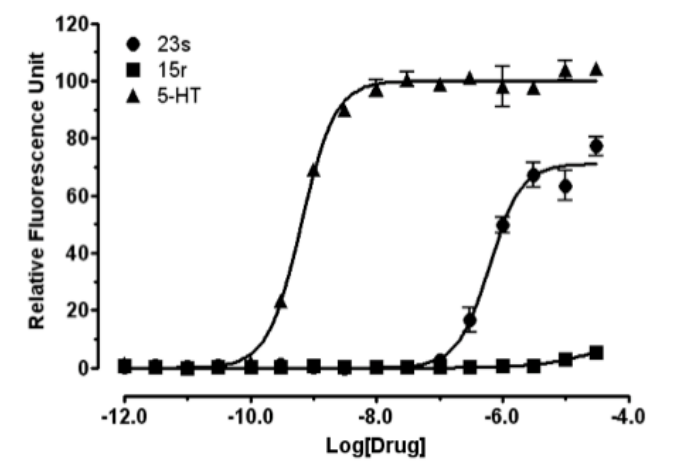

15r: Emax (%) =  $6.9 \pm 1.6$ ; pEC<sub>50</sub> =  $4.92 \pm 0.18$  ; Hill slope =  $1.50 \pm 0.51$

23s: Emax (%) =  $71.2 \pm 1.7$ ; pEC<sub>50</sub> =  $6.21 \pm 0.04$  ; Hill slope =  $1.67 \pm 0.18$

**Figure 3D:** hERG inhibition by PatchXpress (electrophysiology)

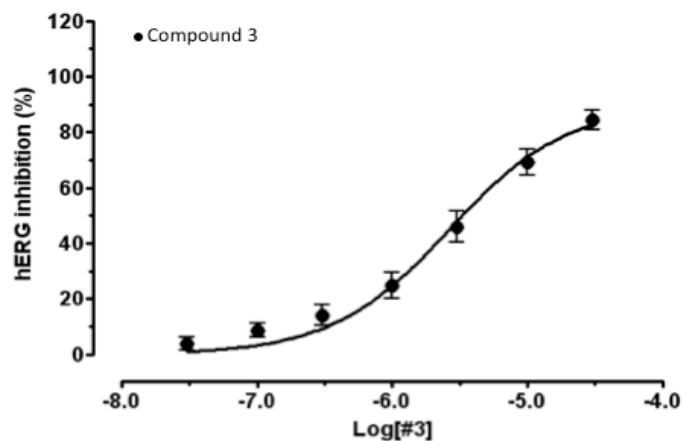

3: Emax (%) =  $89.8 \pm 4.6$ ; pEC50 =  $5.58 \pm 0.08$  ; Hill slope = 1

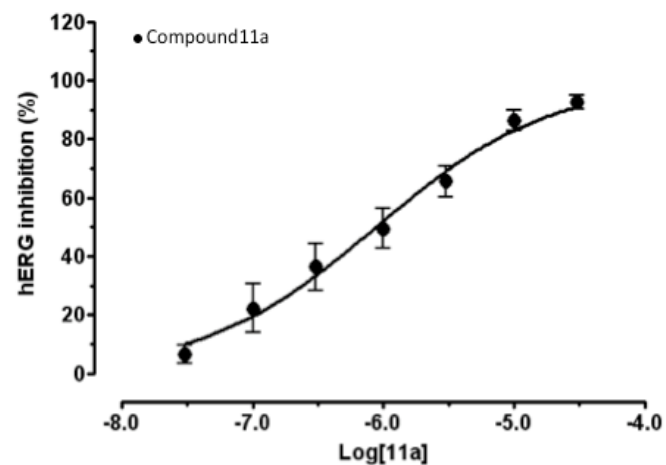

11a: Emax (%) = 100 ; pEC50 =  $6.06 \pm 0.22$  ; Hill slope =  $0.65 \pm 0.14$

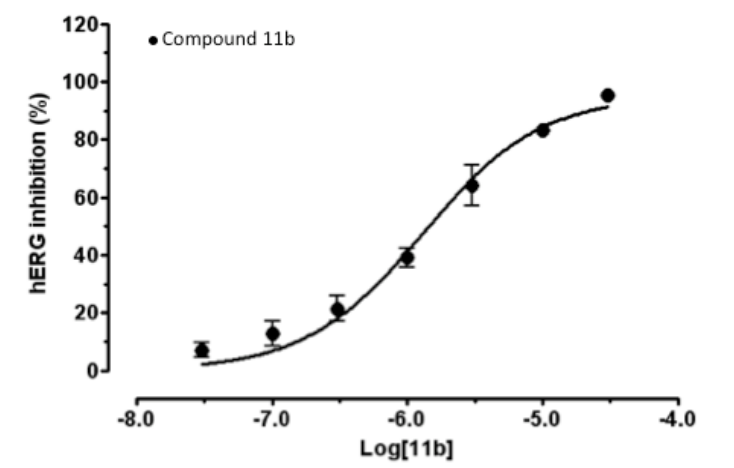

11b: Emax (%) =  $95.2 \pm 5.2$ ; pEC50 =  $5.89 \pm 0.08$  ; Hill slope = 1

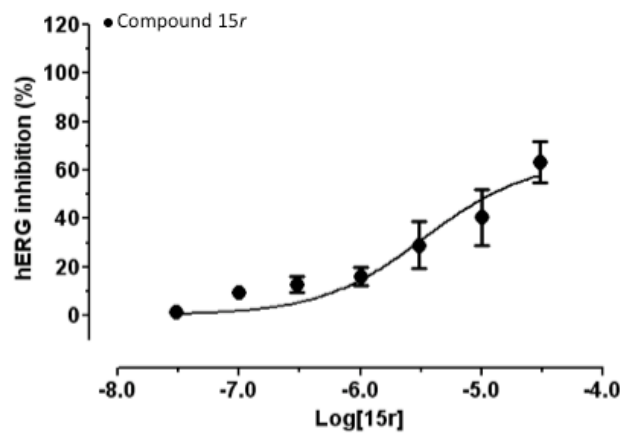

15r: Emax (%) =  $64.3 \pm 8.8$ ; pEC50 =  $5.47 \pm 0.19$  ; Hill slope = 1

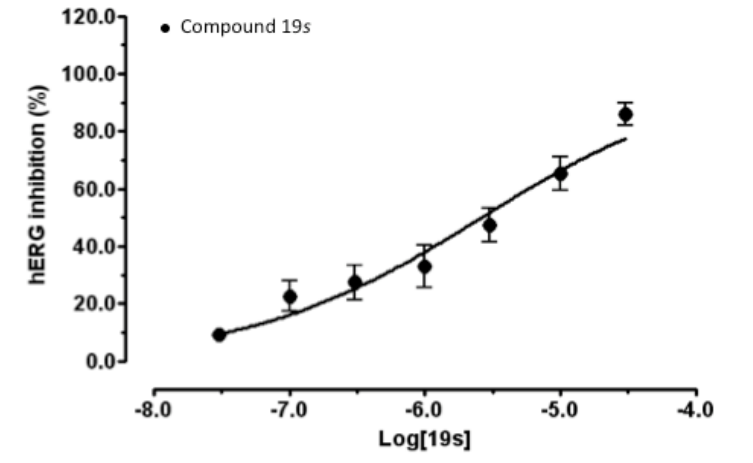

19s: Emax (%) = 100 ; pEC50 =  $5.58 \pm 0.54$  ; Hill slope =  $0.51 \pm 0.15$

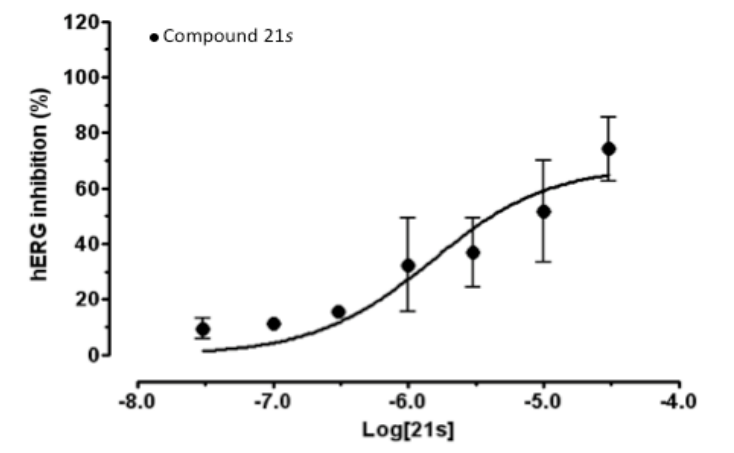

21s: Emax (%) =  $68 \pm 9.8$ ; pEC50 =  $5.83 \pm 0.25$  ; Hill slope = 1

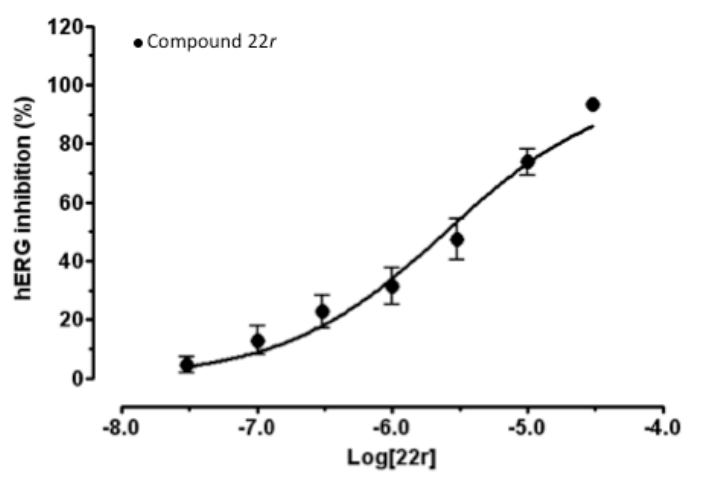

22r: Emax (%) = 100 ; pEC50 = 5.60 ± 0.23 ; Hill slope = 0.73 ± 0.15

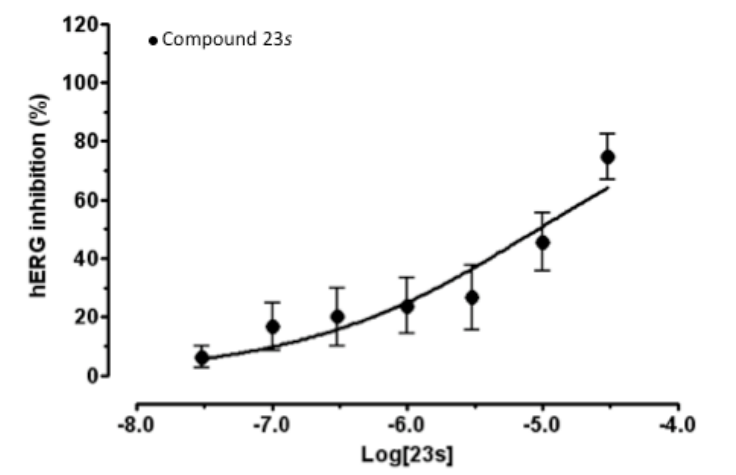

23s Emax (%) = 100 ; pEC50 = 5.03 ± 1.65 ; Hill slope = 0.49 ± 0.30

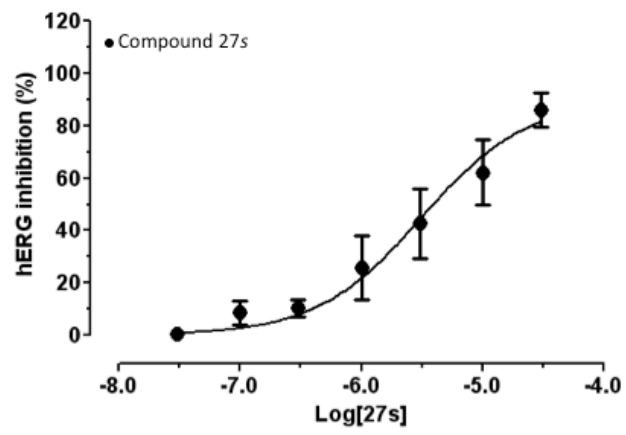

27s: Emax (%) =  $89.9 \pm 10.0$  ; pEC50 =  $5.51 \pm 0.17$  ; Hill slope = 1

**Supplementary Figure 4:** Example of transformations

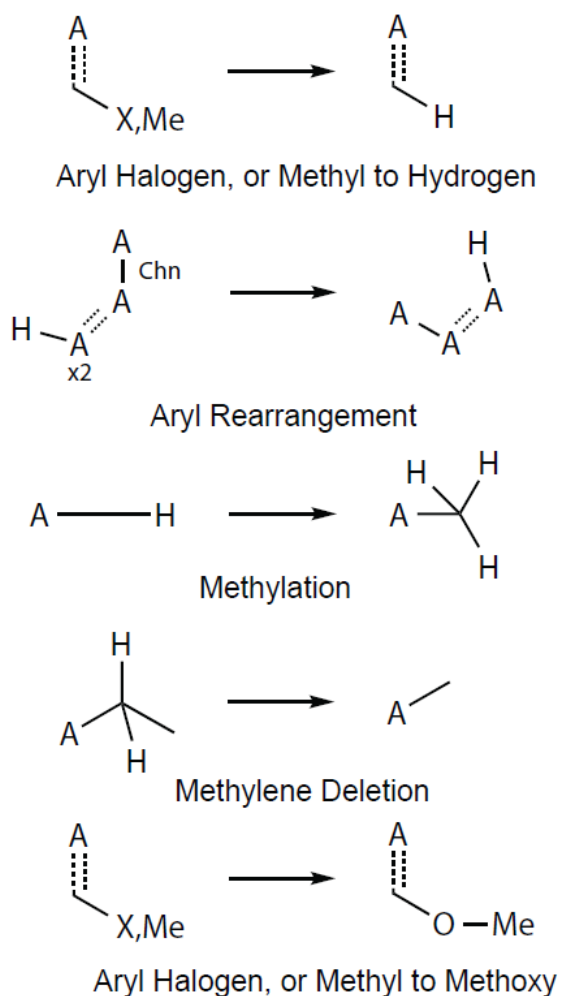

Legend

|     |                     |
|-----|---------------------|
| X   | Halogen             |
| ⋮   | Aromatic Bond       |
| Chn | Bond in a chain     |
| A   | Any atom            |
| x2  | 2 substituents only |

A database of chemical transformation rules are derived from systematically mining the background knowledge encoded in the ChEMBL database of structure-activity data extracted from the literature. Examples of the top 5 most common transformation in ChEMBL are shown.

**Supplementary Figure 5:** Chemical structures of profiled ligands

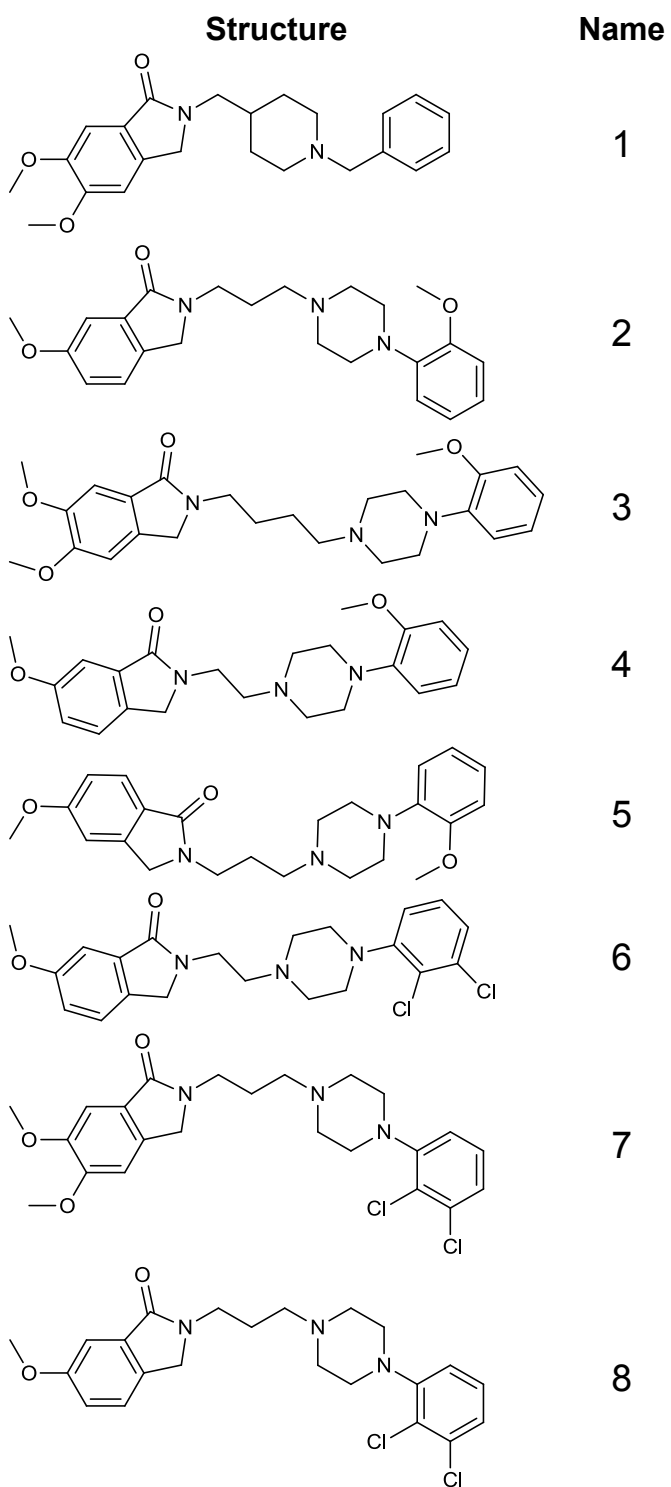



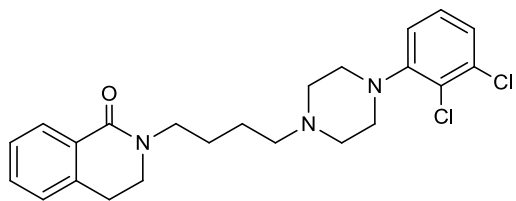

9a

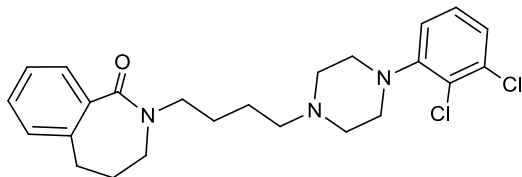

9b

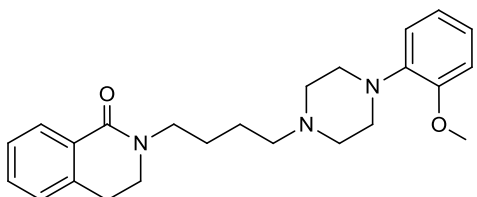

10a

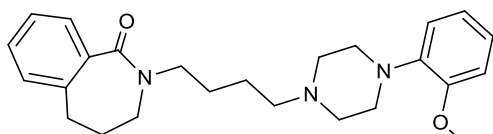

10b

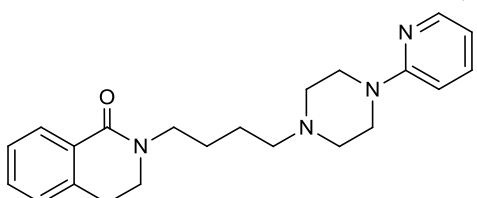

11a

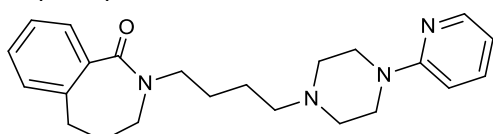

11b

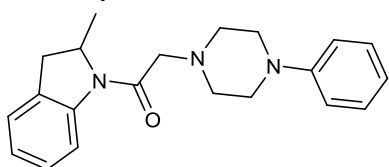

12

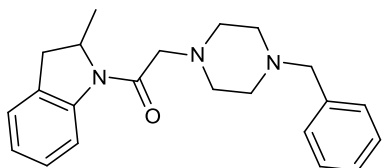

13

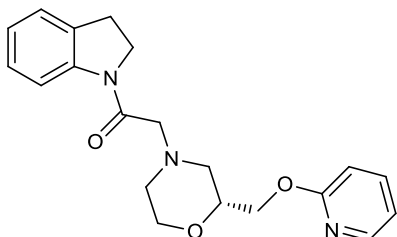

14r

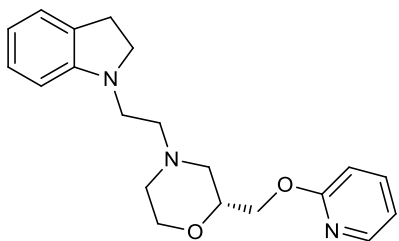

15r

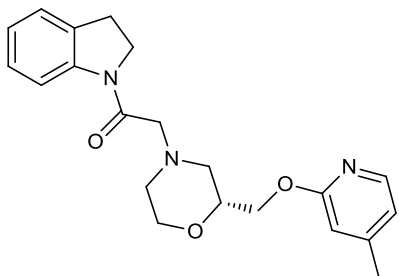

16r

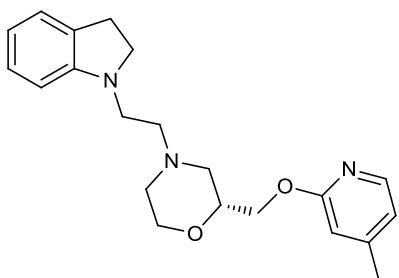

17r

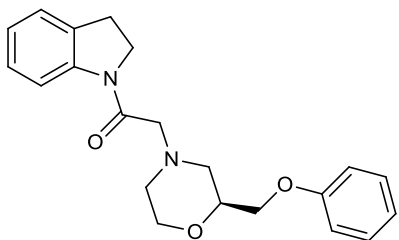

18s

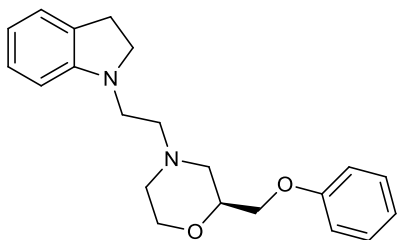

19s

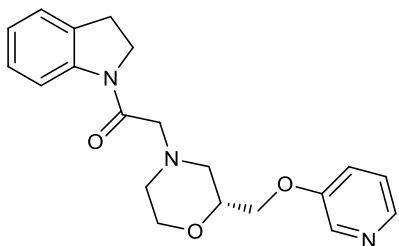

20r

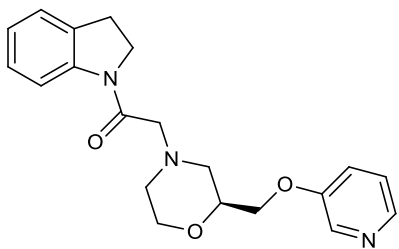

20s

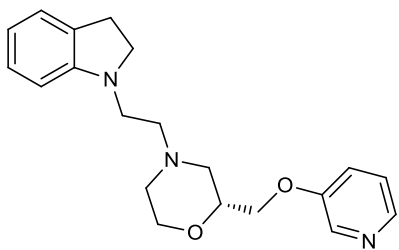

21r

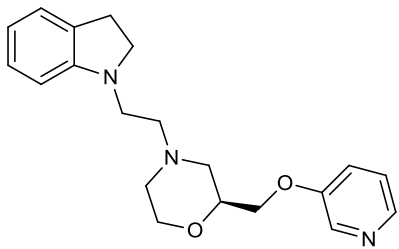

21s

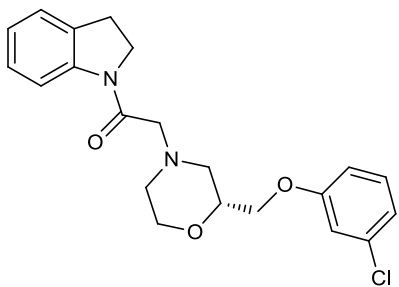

22r

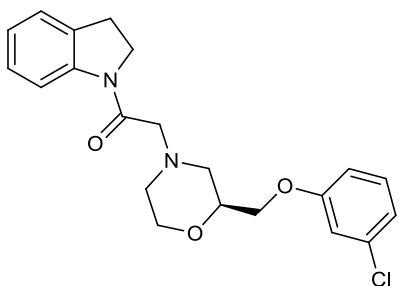

22s

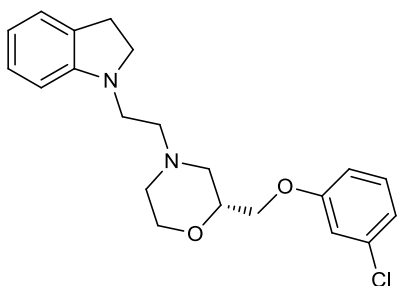

23r

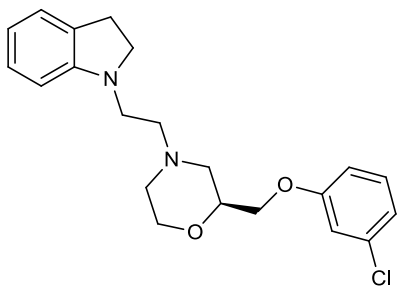

23s

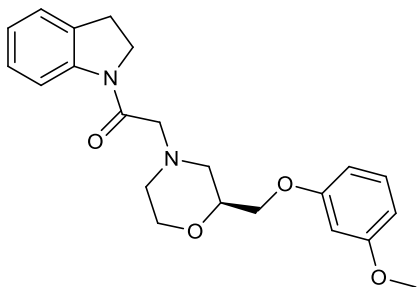

24s

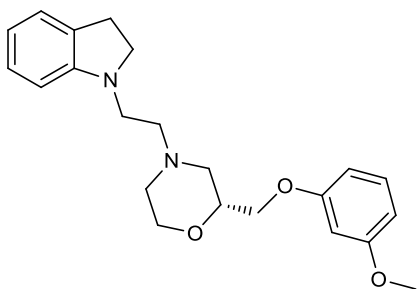

25r

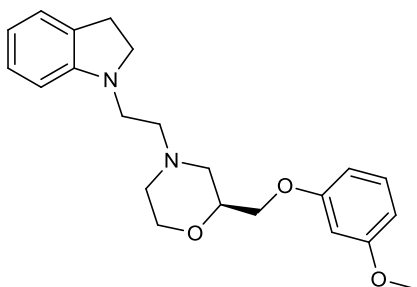

25s

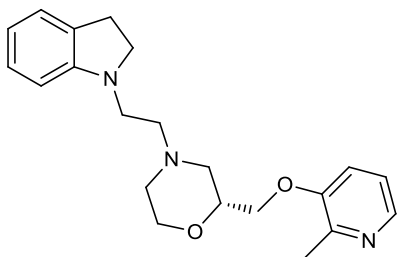

26r

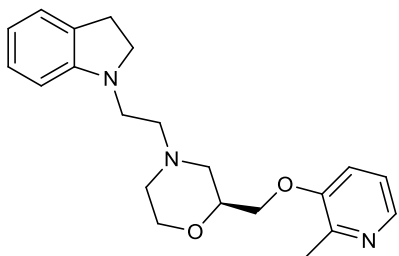

26s

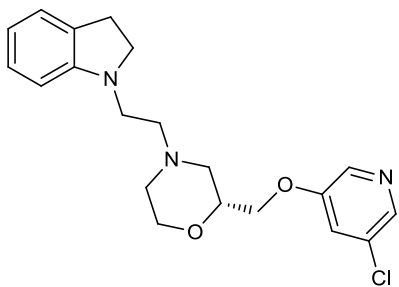

27r

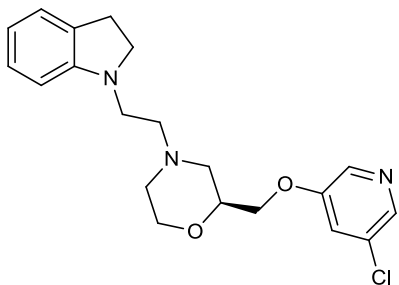

27s

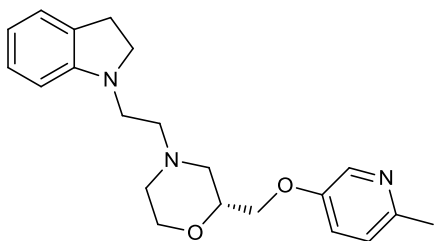

28r

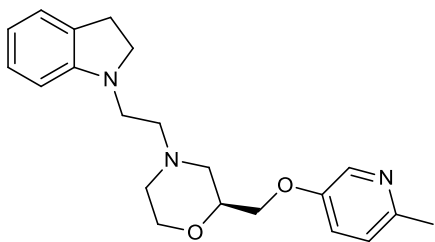

28s

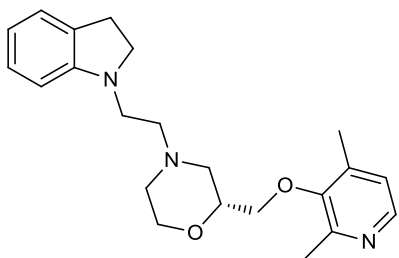

29r

**Supplementary Figure 6:** Evolution of novel dopamine D2 ligands from donepezil

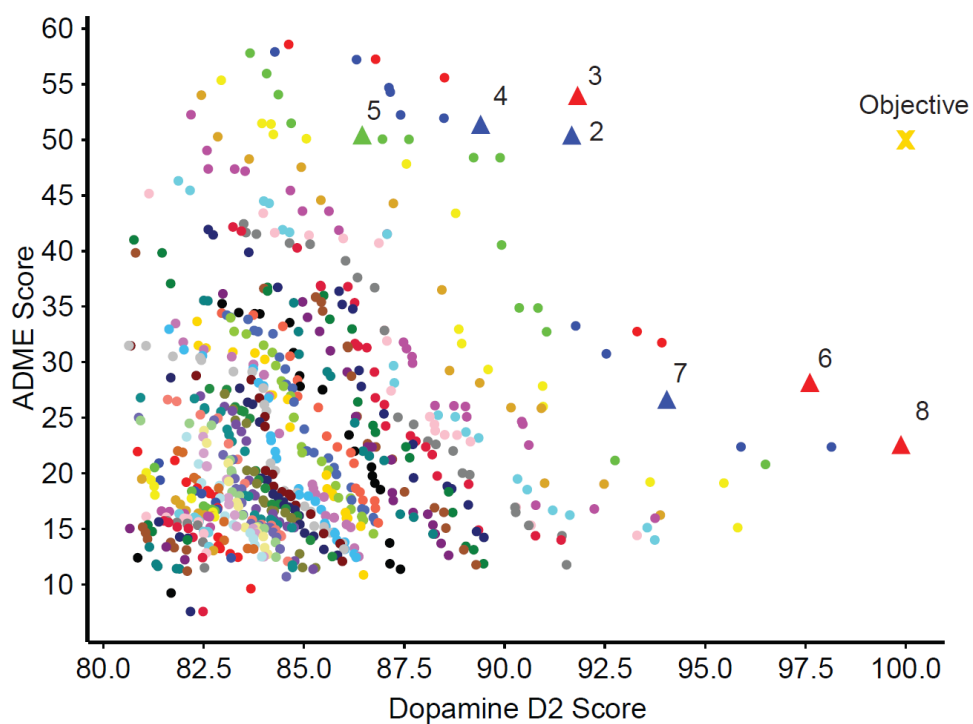

Evolved compound population from donepezil after six generations. The calculated dopamine D2 Bayesian and ADME scores for the final 10,000 compounds, generated by the algorithm, are plotted as coloured circles and triangles. The compounds are coloured by the Pareto frontier ranking (red = 1, blue = 2, green = 3, yellow = 4, brown = 5). The defined achievement objective (Dopamine D2 Bayesian score = 100, CNS ADME score = 50) is defined as a gold cross. The compounds chosen for synthesis and testing (**2-8**) are represented as triangles.

**Supplementary Figure 7:** Evolution pathway from compound **5** to **11a** and **11b**

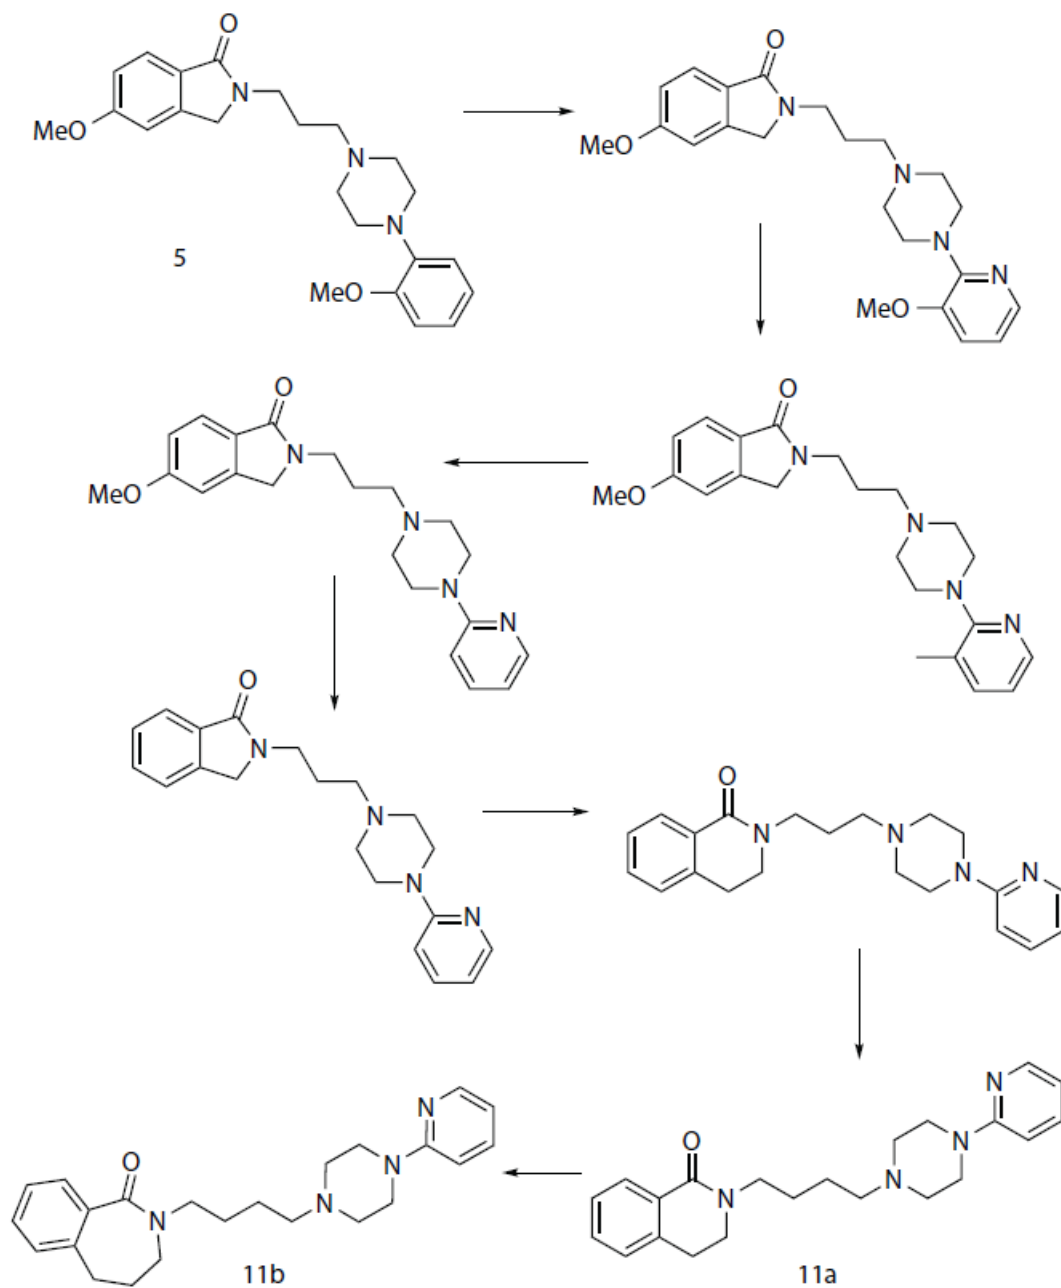

Evolution of the prioritized benzolactam analogues (compound **11a** and **11b**) from a parent isoindole analogue (**5**)

**Supplementary Figure 8:** Evolution of novel dopamine D4 ligands from donepezil

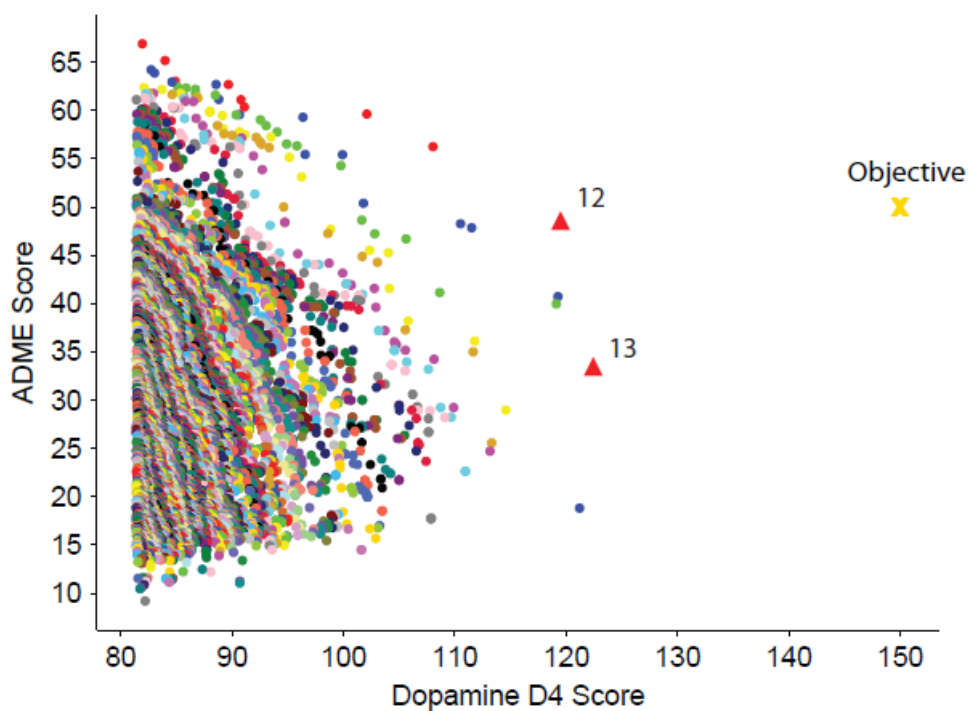

Evolved compound population from donepezil after six generations. The calculated dopamine D4 Bayesian and ADME scores for the final 10,000 compounds generated by the algorithm that are evolved from donepezil and selected for dopamine D4 and CNS ADME objectives, are plotted as coloured circles and triangles. The compounds are coloured by the Pareto frontier ranking as in Fig. 2a. The defined achievement objective (Dopamine D4 Bayesian score = 150, CNS ADME score = 50) is defined as a gold cross. The compounds chosen for testing (**12** and **13**) are represented as triangles



**Supplementary Figure 9:** Evolution pathway from donepezil to compound **13**

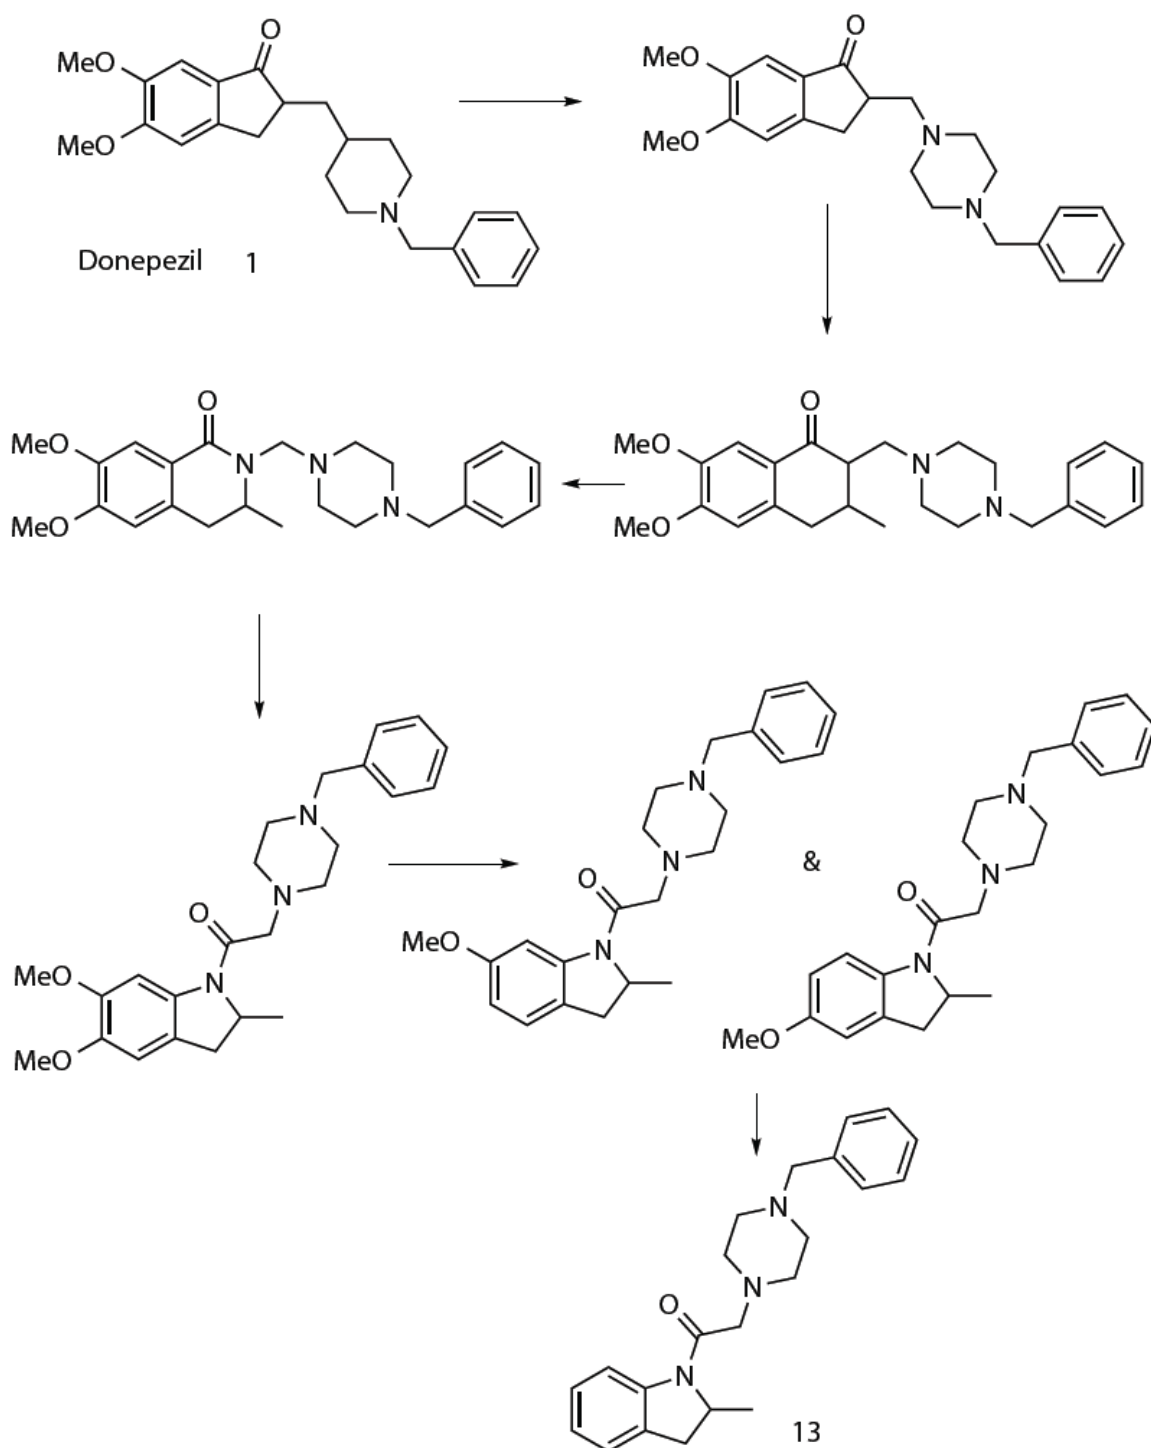

Evolution of donepezil (**1**) (dopamine D4 Bayesian score = 26, D4  $k_i$  = 614nM) into dopamine D4 inverse agonist **13** (dopamine D4 Bayesian score = 112, D4  $k_i$  = 8.9nM). The Tanimoto similarity between donepezil and compound **13** is only 0.26

Supplementary Figure 10: Behavioural responses of PC7 mice to Compound 13

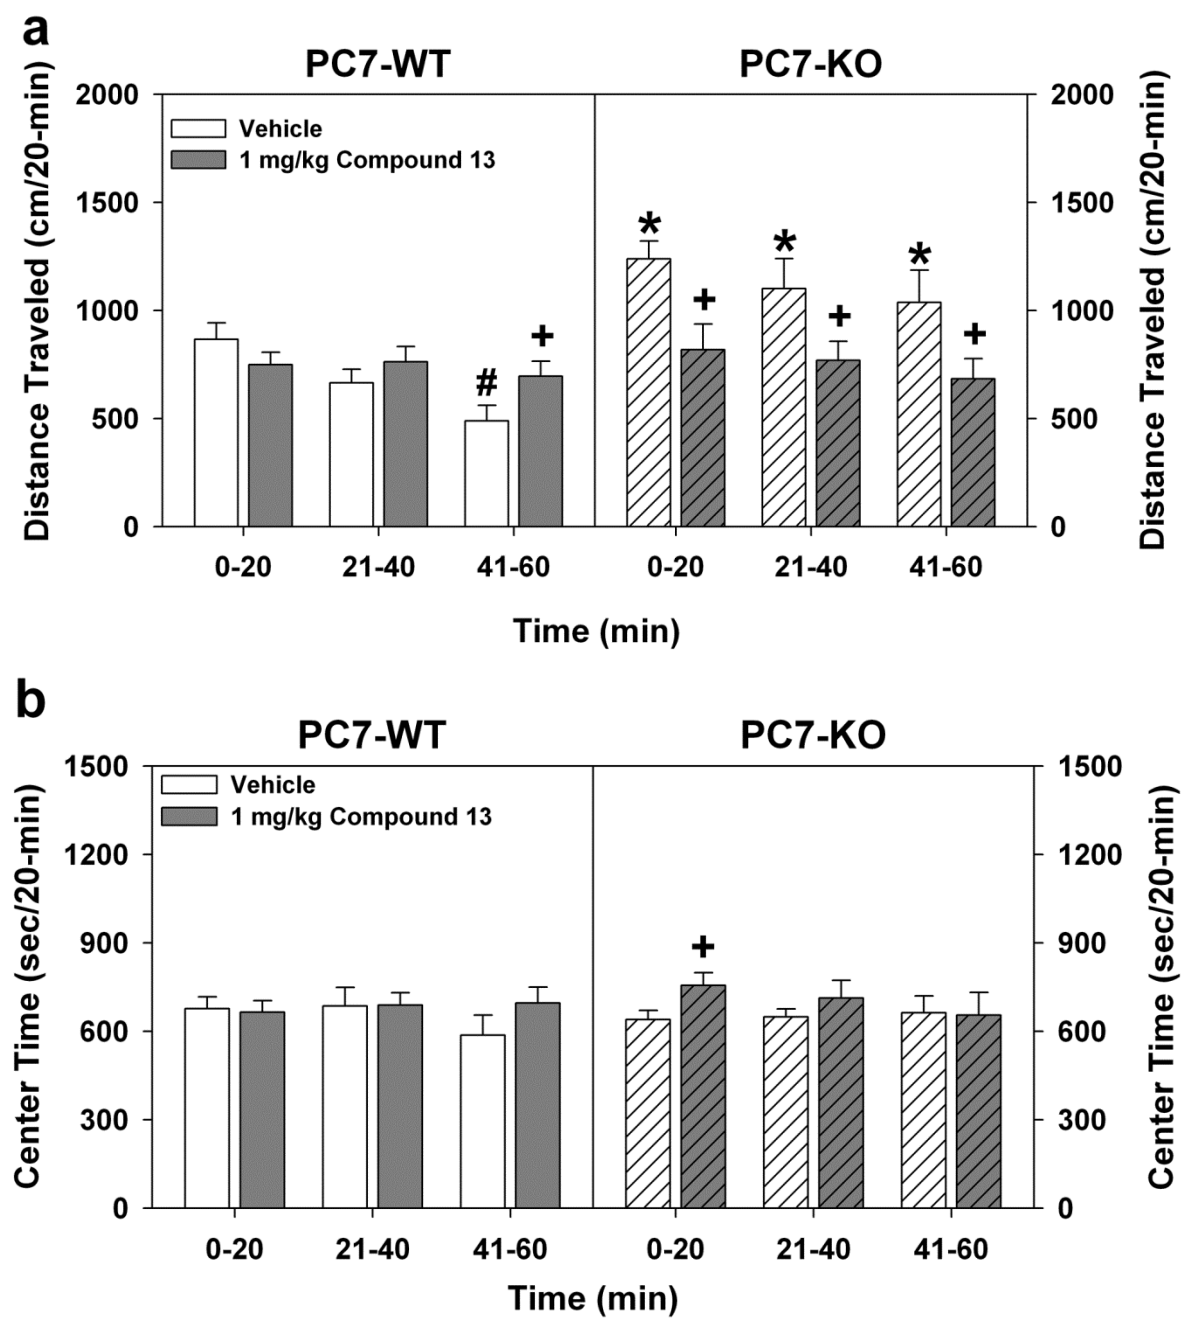

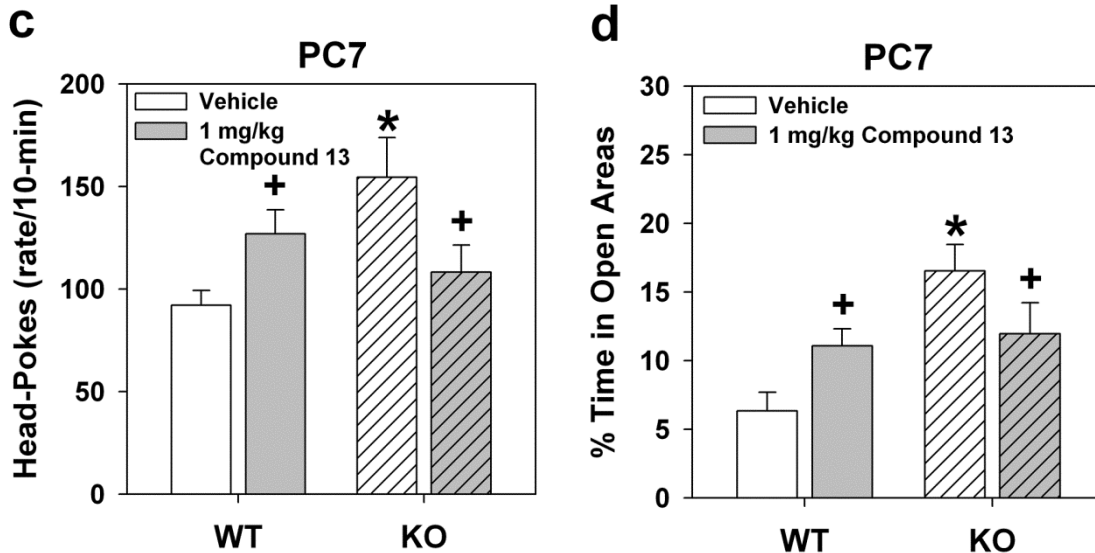

**(a)** Distance travelled in the open field over 60 min by PC7 animals. Mice were given (*i.p.*) vehicle or 1 mg/kg compound **13** and tested immediately over 60 min. **(b)** Time spent in the centre zone in the open field. **(c)** The numbers of head-pokes in the hole-board test in PC7 mice. Animals were injected with vehicle or 1 mg/kg compound **13** and were tested 30 min later over 10 min. **(d)** Percent time in the open areas of the zero maze in PC7 mice. Animals were administered vehicle or 1 mg/kg compound **13** and tested 30 min later for 5 min. N=9-16 PC7 mice/genotype/treatment-condition. \* $p < 0.05$ , WT versus PC7-KO mice; + $p < 0.05$ , comparisons within genotype to the vehicle given in the same time-block; # $p < 0.05$ , compared to the 0-20 min time-point within genotype.

Note:  $p$ -values are rounded to the nearest 0.05 value [example,  $p < 0.0549$  would round to  $p < 0.05$  whereas  $p < 0.0550$  would round to  $p < 0.06$  and be considered not significant (N.S.) or marginally significant].

**Supplementary Figure 11:** Evolution pathway from compound **13** to new morpholino series

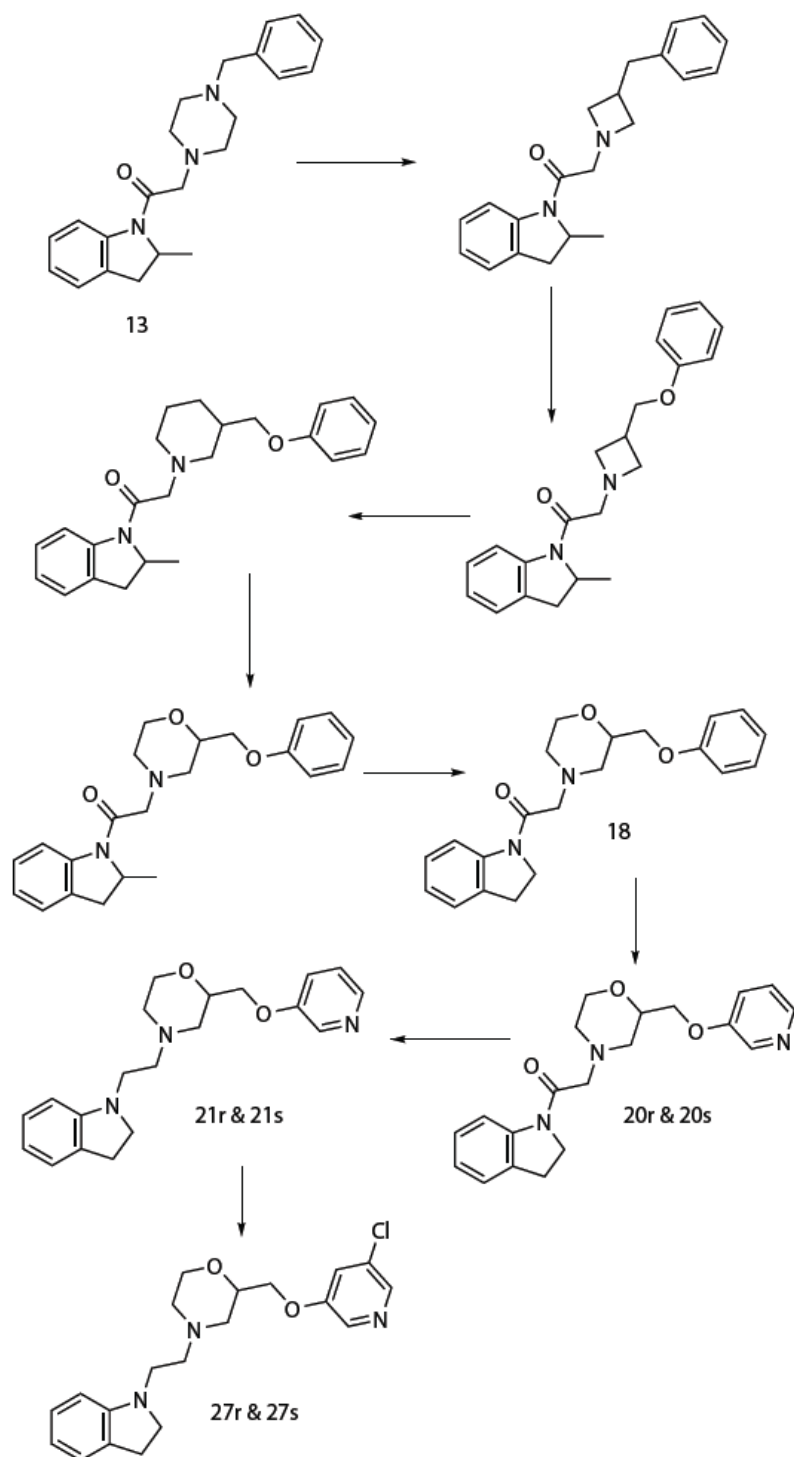

Evolution of selective novel dopamine D4 ligands. Compound **13** is further evolved by selection towards novelty and D4 selectivity into the morpholino analogues **18**, **20** (*r* and *s*), **21** (*r* and *s*) and **27** (*r* and *s*).

**Supplementary Figure 12:** Matthews correlation coefficient vs model score of test sets

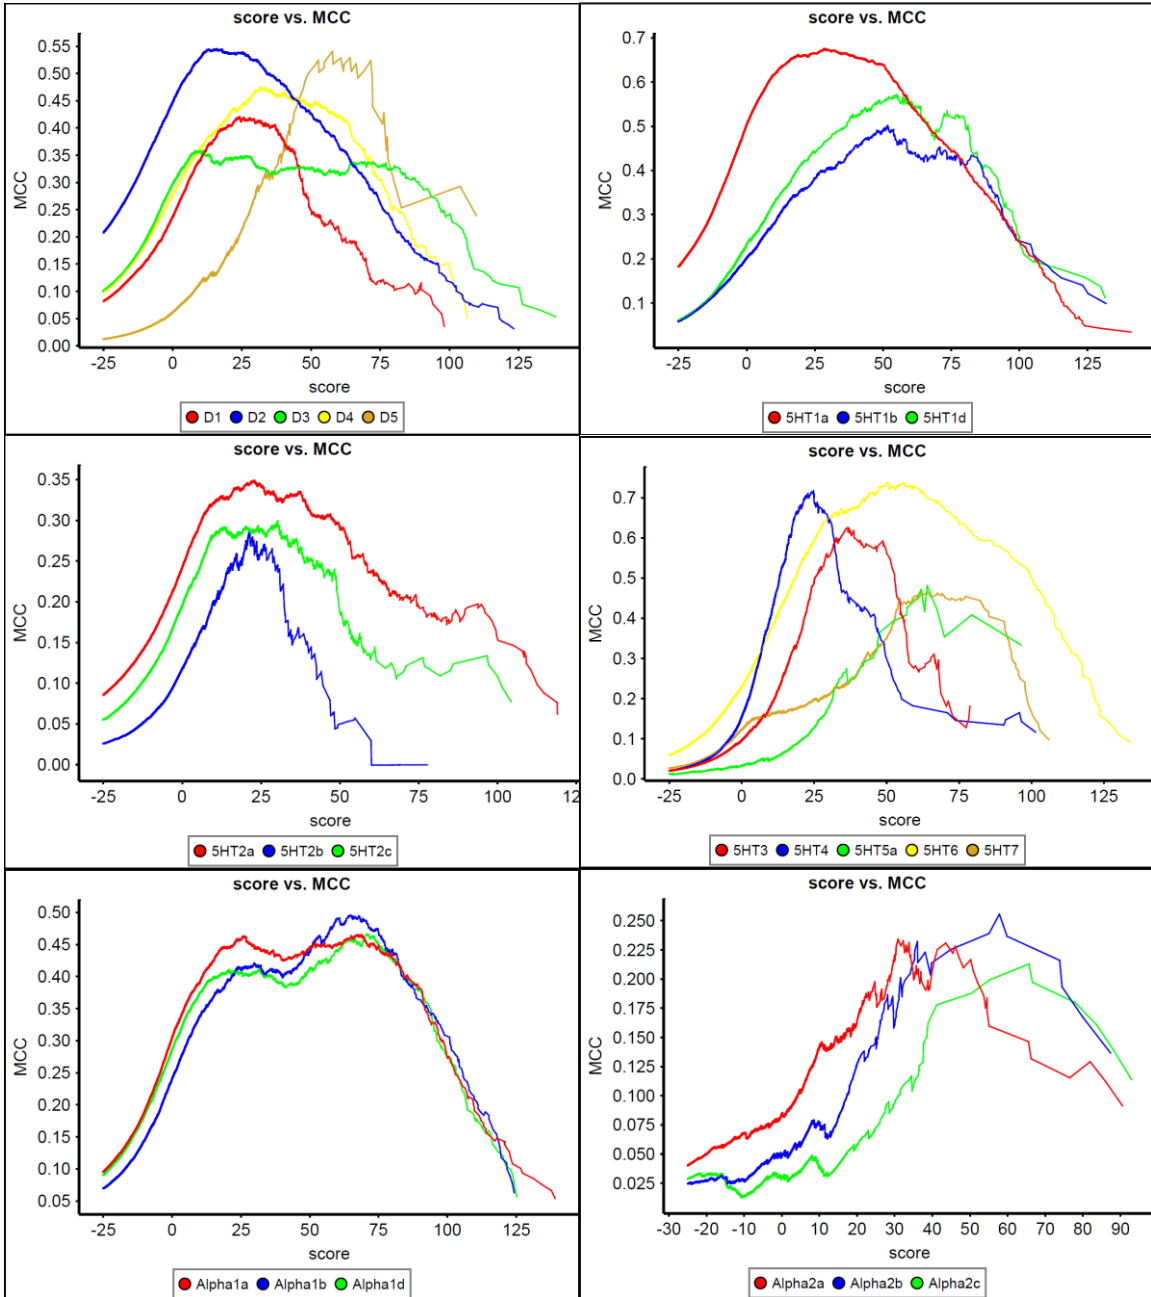

**Supplementary Figure 13:** Receiver operating characteristic curves of the test sets

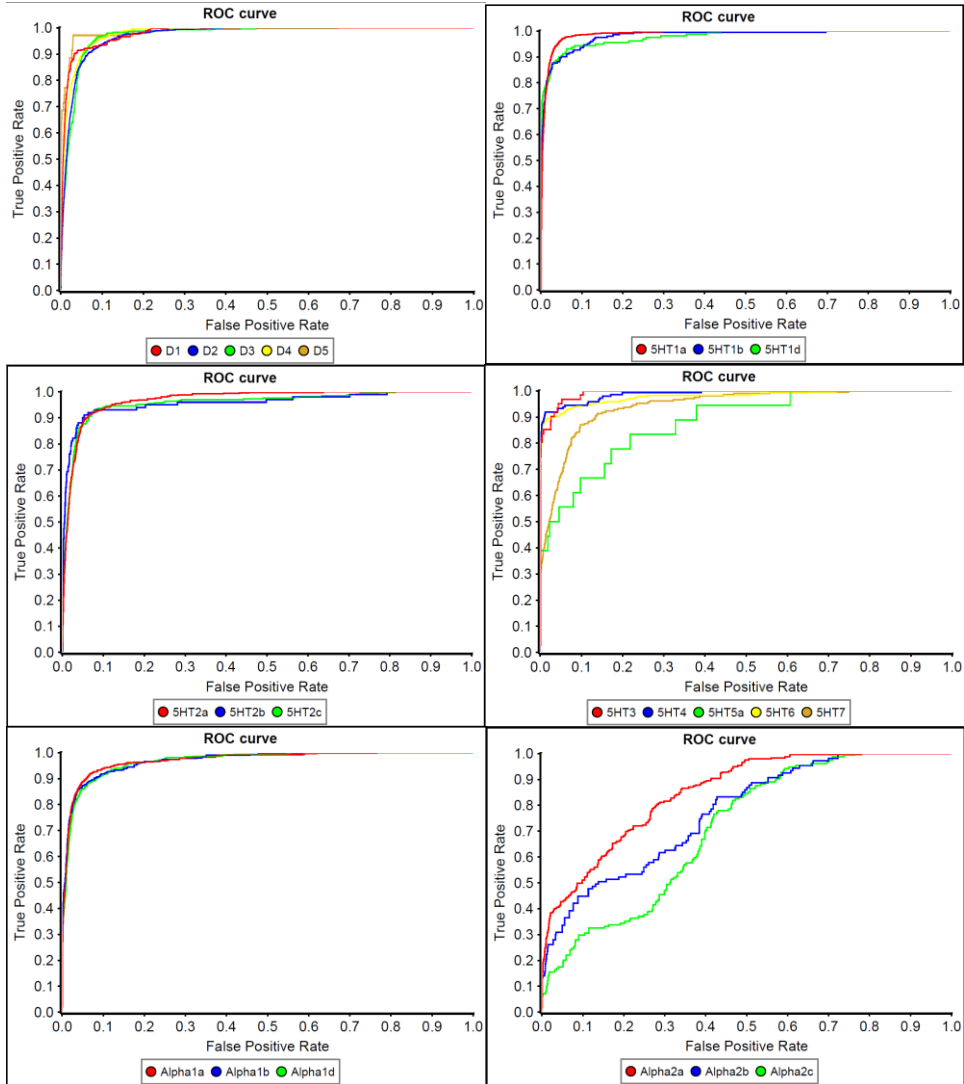

## Supplementary Methods

### 1. Synthesis of isoindole analogues

The isoindole series was prepared according to scheme S1

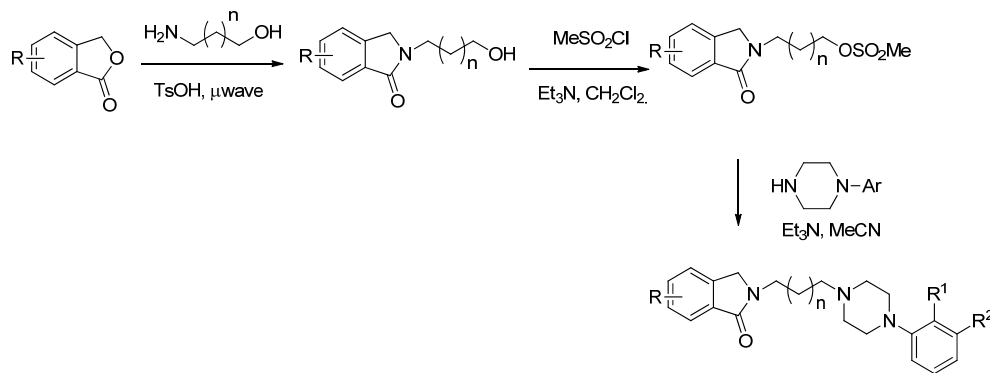

Scheme S1: Synthesis of isoindoles

#### 1.1 General Procedures

##### General procedure A

Lactone (1 mmol), amino alcohol (2 mmol) and *p*-toluenesulfonic acid (0.2 mmol) were stirred together into a microwave vial and irradiated for 1 h at 200 °C. The brown mixture was then diluted with diethyl ether and washed with water. The aqueous phase was further extracted with ethylacetate. The collected organic fractions were dried over MgSO<sub>4</sub> and concentrated under reduced pressure to a residue, which was used for the next step without further purification.

##### General procedure B

To a cooled solution of alcohol (1 mmol) and triethylamine (1.5 mmol) in dry dichloromethane, was slowly added mesyl chloride (1.5 mmol) with a syringe. The reaction was warmed to room temperature, stirred for 3 h and quenched with a saturated solution of NaHCO<sub>3</sub>. The phases were separated and the aqueous layer was further extracted with dichloromethane. The solvents were dried over MgSO<sub>4</sub> and removed *in vacuo*. The final residue was purified by flash column chromatography or used for the next step without further purification.

##### General procedure C

A microwave vial was charged with the appropriate mesylate or alkyl halide (1 mmol), corresponding piperidine (1.05 mmol), triethylamine (1.2 mmol) and acetonitrile (2 mL). The vial was sealed and irradiated for 30 min at 100 °C. The solvent was removed under reduced pressure and the crude residue was purified by flash column chromatography. The free amine was converted into HCl salt for the biological assay by addition of 2M HCl in ether to a solution of the free amine

#### 1.2 Compounds 2 and 8

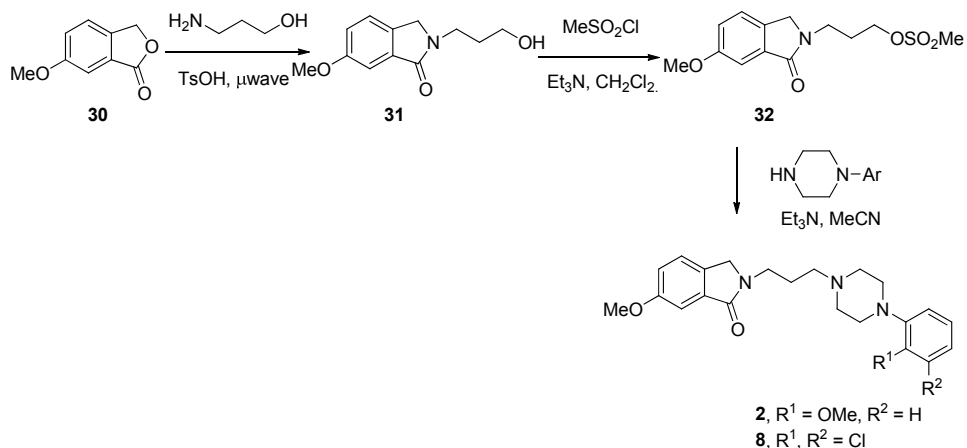

Scheme S2

### 2-(3-Hydroxypropyl)-6-methoxyisoindolin-1-one (31)

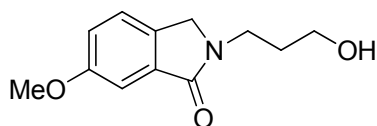

General procedure A starting from (6-methoxy)isobenzofuranone **30** (200 mg, 1.21 mmol), 3-amino-1-propanol (0.18 mL, 2.42 mmol), *p*-toluenesulfonic acid (34 mg, 0.15 mmol). Compound **31** was obtained as a colourless oil, 159 mg, (59%).

$^1\text{H-NMR}$  (500 MHz,  $\text{CDCl}_3$ )  $\delta$ : 1.85 (qt, 2H,  $J = 6.1$  Hz,  $\text{CH}_2$ ), 3.57-3.59 (m, 2H,  $\text{CH}_2\text{N}$ ), 3.71 (bs, 1H,  $\text{OH}$ ), 3.79 (t, 2H,  $J = 6.1$  Hz,  $\text{CH}_2\text{O}$ ), 3.88 (s, 3H,  $\text{OCH}_3$ ), 4.36 (s, 2H,  $\text{Ar-CH}_2$ ), 7.12-7.14 (m, 1H,  $\text{ArH}$ ), 7.35-7.39 (m, 2H,  $\text{ArH}$ ).  $^{13}\text{C-NMR}$  (125 MHz,  $\text{CDCl}_3$ )  $\delta$ : 30.9, 38.9, 50.0, 55.7, 58.3, 106.5, 120.0, 123.6, 133.3, 133.6, 160.1, 169.8. LCMS:  $m/z$  222.12 ( $[\text{M}+\text{H}]^+$ , 100%); Rt 0.7 min, purity >99% DAD (180-450 nm).

### 3-(6-Methoxy-1-oxoisindolin-2-yl)propyl methanesulfonate (32)

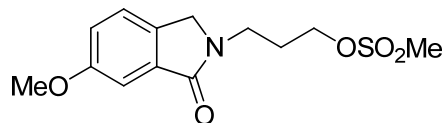

General procedure B from **31** (152 mg, 0.69 mmol), mesyl chloride (0.08 mL, 1.03 mmol), triethylamine (0.14 mL, 1.03 mmol) and dichloromethane (8 mL). Compound **32** was obtained as a slightly green solid, 205 mg (99%) and used for the next step without further purification. LCMS:  $m/z$  616.22 ( $[\text{2M}+\text{NH}_4]^+$ , 100%); Rt 4.5 min, purity >99% DAD (180-450 nm).

### 6-Methoxy-2-(3-(4-(2-methoxyphenyl)piperazin-1-yl)propyl)isoindolin-1-one (2)



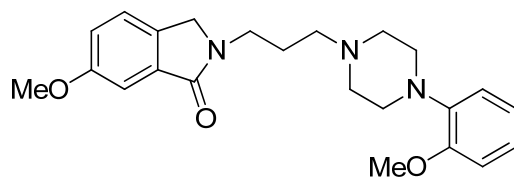

General procedure C from **32** (100 mg, 0.33 mmol), (2-methoxyphenyl)piperazine (67 mg, 0.35 mmol), triethylamine (0.05 ml, 0.40 mmol) and acetonitrile (1.5 mL). Yellowish oil, 90 mg (69%).

$^1\text{H-NMR}$  (500 MHz,  $\text{D}_2\text{O}$ )  $\delta$ : 2.16 (qt, 2H,  $J = 7$  Hz,  $\text{CH}_2$ ), 3.23-3.26 (m, 2H,  $\text{CH}_2\text{N}$ ), 3.45 (bs, 8H, 2 x  $(\text{CH}_2)_2\text{N}$ ), 3.69 (t, 2H,  $J = 6.6$  Hz,  $\text{CONCH}_2$ ), 3.81, 3.83 (2s, 6H, 2 x  $\text{OCH}_3$ ), 4.45 (s, 2H,  $\text{Ar-CH}_2$ ), 6.98 (t, 1H,  $J = 7.7$  Hz,  $\text{ArH}$ ), 7.04 (d, 1H,  $J = 8.2$  Hz,  $\text{ArH}$ ), 7.10 (d, 1H,  $J = 8.9$  Hz,  $\text{ArH}$ ), 7.16-7.22 (m, 3H,  $\text{ArH}$ ), 7.46 (d, 1H,  $J = 8.4$  Hz,  $\text{ArH}$ ).  $^{13}\text{C-NMR}$  (125 MHz,  $\text{D}_2\text{O}$ )  $\delta$ : 22.6, 39.7, 47.9, 50.5, 54.2, 55.3, 55.8, 106.6, 112.1, 119.1, 119.8, 121.3, 124.3, 126.0, 141.8, 151.9, 159.3, 170.8. LCMS:  $m/z$  396.24 ( $[\text{M}+\text{H}]^+$ , 100%), Rt 0.8 min, purity >99% DAD (180-450 nm). HRMS: Found 396.2296  $\text{C}_{23}\text{H}_{30}\text{N}_3\text{O}_3$   $[\text{M} + \text{H}]^+$  requires 396.2282. Converted to HCl salt for assay.

### 2-(3-(4-(2,3-Dichlorophenyl)piperazin-1-yl)propyl)-6-methoxyisoindolin-1-one (**8**).

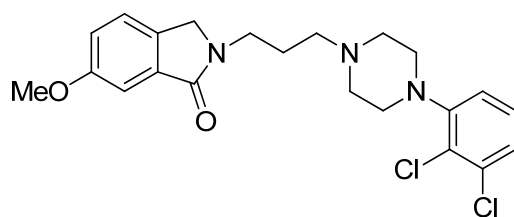

General procedure C from **32** (100 mg, 0.33 mmol), (2,2-dichlorophenyl)piperazine (118 mg, 0.44 mmol), triethylamine (0.14 ml, 0.81 mmol) and acetonitrile (2 mL). Yellowish oil, 41 mg (25%).

$^1\text{H-NMR}$  (500 MHz,  $\text{CD}_3\text{OD}$ )  $\delta$ : 2.23 (qt, 2H,  $J = 6.6$  Hz,  $\text{CH}_2$ ), 3.19 (bs, 2H,  $\text{CH}_2\text{N}$ ), 3.21-3.29 (m, 2H,  $\text{CH}_2$ ), 3.73 (bs, 2H,  $\text{CH}_2\text{N}$ ), 3.57 (bs, 2H,  $\text{CH}_2\text{N}$ ), 3.70 (bs, 2H,  $\text{CH}_2\text{N}$ ), 3.81 (t, 2H,  $J = 6.6$  Hz,  $\text{CH}_2$ ), 3.89 (s, 3H,  $\text{OCH}_3$ ), 4.55 (s, 2H,  $\text{Ar-CH}_2\text{N}$ ), 7.19 (dd, 1H,  $J = 7.0, 2.5$ ,  $\text{ArH}$ ), 7.23 (dd, 1H,  $J = 8.4, 2.5$  Hz,  $\text{ArH}$ ), 7.31-7.35 (m, 3H,  $\text{ArH}$ ), 7.51 (dd, 1H,  $J = 8.4, 0.5$ ,  $\text{ArH}$ ). LCMS:  $m/z$  434.15 ( $[\text{M}+\text{H}]^+$ , 100%); Rt 0.8 min, purity >95% DAD (180-450 nm). Converted to HCl salt for assay.

### 1.3 Compound 3

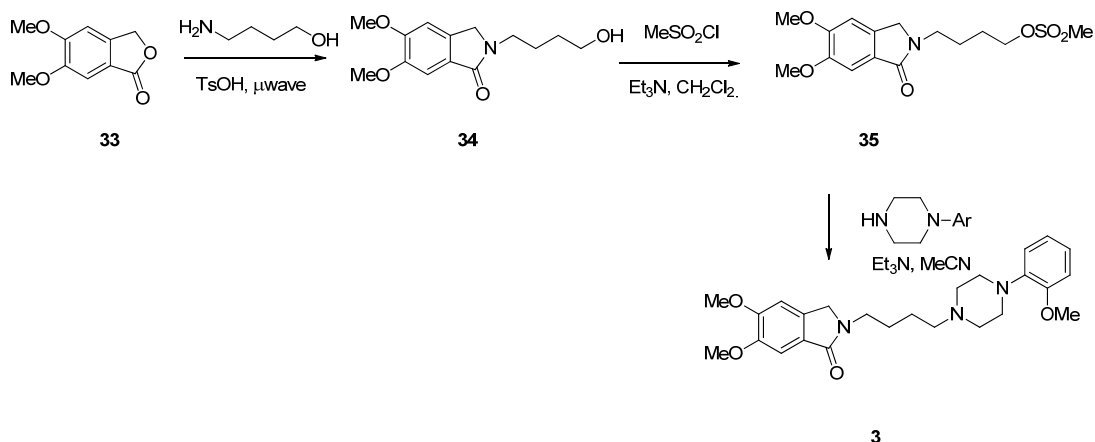

Scheme S3

### 2-(4-Hydroxybutyl)-5,6-dimethoxyisoindolin-1-one (**34**)

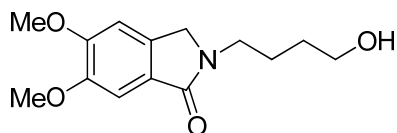

General procedure A starting from (5,6-dimethoxy)isobenzofuranone **33** (100 mg, 0.51 mmol), 4-amino-1-butanol (0.095 mL, 1.02 mmol), *p*-toluenesulfonic acid (19 mg, 0.10 mmol) and toluene (0.5 mL). The title compound was obtained as a colourless oil, 5 mg (4%).

LCMS:  $m/z$  266.14 ( $[M+H]^+$ , 100%); Rt 4.5 min, purity >99% DAD (180-450 nm).

### 4-(5,6-Dimethoxy-1-oxoisoindolin-2-yl)butyl methanesulfonate (**35**)

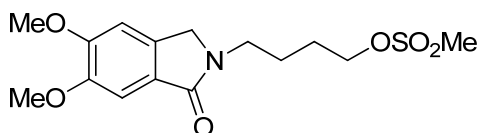

General procedure B starting from **34** (5 mg, 0.018 mmol), mesyl chloride (0.016 mL, 0.020 mmol), triethylamine (0.036 mL, 0.023 mmol) and dichloromethane (0.5 mL). Compound **34** was isolated as a white wax, 6 mg (97%) and used for the next step without further purification.

LCMS:  $m/z$  344.12 ( $[M+H]^+$ , 100%).

### 5,6-dimethoxy-2-(4-(4-(2-methoxyphenyl)piperazin-1-yl)butyl)isoindolin-1-one (**3**)

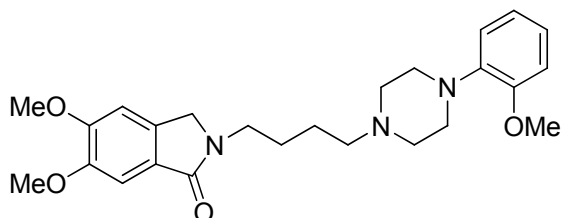

General procedure C from mesylate **35** (6 mg, 0.018 mmol), (2-methoxyphenyl)piperazine (3.8 mg, 0.019 mmol), triethylamine (0.03 mL, 0.023 mmol) and acetonitrile (0.75 mL). Colourless oil, 4 mg (50%).

$^1\text{H-NMR}$  (500 MHz,  $\text{CDCl}_3$ )  $\delta$ : 1.51-1.57 (m, 2H,  $\text{CH}_2$ ), 1.62-1.68 (m, 2H,  $\text{CH}_2$ ), 2.41 (t, 2H,  $J = 7.3$  Hz,  $\text{CH}_2\text{N}$ ), 2.59 (bs, 4H,  $(\text{CH}_2)_2\text{N}$ ), 3.02 (bs, 4H,  $(\text{CH}_2)_2\text{N}$ ), 3.56 (t, 2H,  $J = 7.2$  Hz,  $\text{CH}_2\text{N}$ ), 3.79 (s, 3H,  $\text{OCH}_3$ ), 3.87 (s, 3H,  $\text{OCH}_3$ ), 4.23 (s, 2H,  $\text{Ar-CH}_2$ ), 6.78 (dd, 1H,  $J = 8.0, 1.2$  Hz,  $\text{ArH}$ ), 6.82-6.87 (m, 3H,  $\text{ArH}$ ), 6.91-6.94 (m, 1H,  $\text{ArH}$ ), 7.24 (s, 1H,  $\text{ArH}$ ).  $^{13}\text{C-NMR}$  (125 MHz,  $\text{CDCl}_3$ )  $\delta$ : 26.5, 42.3, 49.6, 50.5, 53.4, 55.4, 56.2, 56.2, 58.2, 105.0, 105.4, 111.2, 118.2, 121.0, 122.9, 133.0, 134.6, 149.7, 152.3, 152.4, 172.8. LCMS:  $m/z$  440.26 ( $[M+H]^+$ , 100%); Rt 5.8 min, purity >99% DAD (180-450 nm). HRMS: Found 440.2551  $\text{C}_{25}\text{H}_{34}\text{N}_3\text{O}_4$   $[M + H]^+$  requires 440.2544. Converted to HCl salt for assay.

## 1.3 Compound 4 and 6

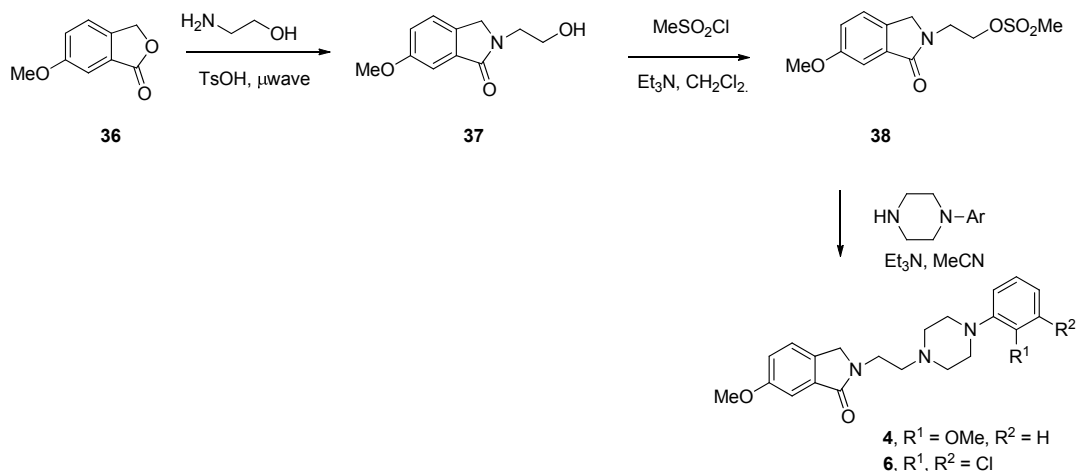

Scheme S4

### 2-(2-Hydroxyethyl)-6-methoxyisoindolin-1-one (37)

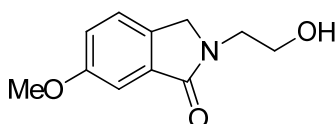

General procedure A from (6-methoxy)isobenzofuranone **36** (200 mg, 1.21 mmol), 2-amino-1-ethanol (0.15 mL, 2.42 mmol), *p*-toluenesulfonic acid (34 mg, 0.15 mmol). Compound **37** was isolated as colourless oil, 97 mg (38%).

<sup>1</sup>H-NMR (500 MHz, CDCl<sub>3</sub>) δ: 3.68 (t, 2H, *J* = 5 Hz, CH<sub>2</sub>N), 3.77 (s, 3H, OCH<sub>3</sub>), 3.82-3.85 (m, 2H, CH<sub>2</sub>OH), 4.36 (s, 2H, Ar-CH<sub>2</sub>), 7.01 (dd, 1H, *J* = 8.5, 2.3, ArH), 7.23-7.24 (m, 2H, ArH). <sup>13</sup>C-NMR (125 MHz, CDCl<sub>3</sub>) δ: 42.8, 55.5, 62.1, 64.0, 113.9, 116.0, 131.5, 132.2, 136.9, 159.3, 170.3. LCMS: *m/z* 208.12 ([M+H]<sup>+</sup>, 100%); Rt 0.8 min, purity >99% DAD (180-450 nm).

### 2-(6-Methoxy-1-oxoisoindolin-2-yl)ethyl methanesulfonate (38)

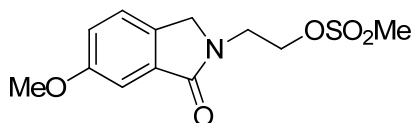

General procedure B from **37** (90 mg, 0.43 mmol), mesyl chloride (0.04 mL, 0.52 mmol), triethylamine (0.07 mL, 0.52 mmol) and dichloromethane (2 mL). Compound **38** was isolated as a brownish solid, 117 mg (quantitative) and used for the next step without further purification. LCMS: *m/z* 286.08 ([M+H]<sup>+</sup>, 100%); Rt 0.8 min, purity >95% DAD (180-450 nm).

### 6-methoxy-2-(2-(4-(2-methoxyphenyl)piperazin-1-yl)ethyl)isoindolin-1-one (4)

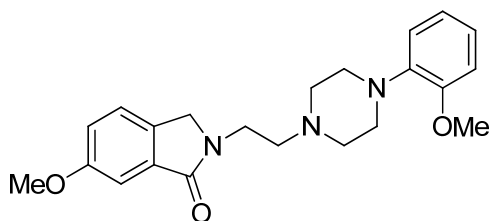

General procedure C starting from mesylate **38** (60 mg, 0.21 mmol), (2-methoxyphenyl)piperazine (43 mg, 0.22 mmol), triethylamine (0.044 mL, 0.32 mmol) in acetonitrile (1 mL). Compound **4** was obtained as a yellowish oil, 58 mg (72%).

$^1\text{H-NMR}$  (500 MHz,  $\text{CDCl}_3$ )  $\delta$ : 2.73-2.75 (m, 6H,  $(\text{CH}_2)_2\text{N} + \text{CH}_2\text{N}$ ), 3.10 (m, 4H,  $(\text{CH}_2)_2\text{N}$ ), 3.81 (t, 2H,  $J = 6.4$  Hz,  $\text{CH}_2\text{N}$ ), 3.88 (s, 3H,  $\text{OCH}_3$ ), 3.89 (s, 3H,  $\text{OCH}_3$ ), 4.49 (s, 2H,  $\text{Ar-CH}_2$ ), 6.89 (dd, 1H,  $J = 7.8, 1.2$ ,  $\text{ArH}$ ), 6.92-6.96 (m, 2H,  $\text{ArH}$ ), 7.00-7.03 (m, 1H,  $\text{ArH}$ ), 7.13 (dd, 1H,  $J = 8.3, 2.5$  Hz,  $\text{ArH}$ ), 7.35 (dd, 1H,  $J = 8.4, 0.5$  Hz,  $\text{ArH}$ ), 7.37 (d, 1H,  $J = 2.4$  Hz,  $\text{ArH}$ ).  $^{13}\text{C-NMR}$  (125 MHz,  $\text{CD}_3\text{OD}$ )  $\delta$ : 38.9, 49.3, 51.5, 53.6, 56.2, 56.2, 56.5, 107.7, 113.3, 120.4, 121.2, 122.4, 125.3, 126.7, 135.9, 139.0, 154.0, 161.7, 172.3. LCMS:  $m/z$  382.22 ( $[\text{M}+\text{H}]^+$ , 100%); Rt 5.0 min, purity >99% DAD (180-450 nm). HRMS: Found 382.2121  $\text{C}_{22}\text{H}_{28}\text{N}_3\text{O}_3$   $[\text{M} + \text{H}]^+$  requires 382.2125. Converted to HCl salt for assay.

#### 2-(2-(4-(2,3-Dichlorophenyl)piperazin-1-yl)ethyl)-6-methoxyisoindolin-1-one (**6**)

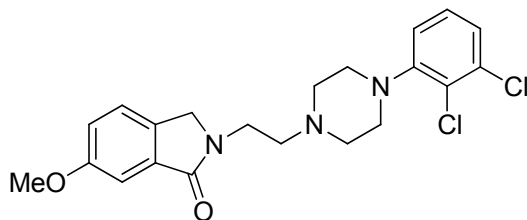

General procedure C from mesylate **38** (57 mg, 0.20 mmol), (2,3-dichlorophenyl)piperazine (59 mg, 0.22 mmol), triethylamine (0.06 mL, 0.44 mmol) in acetonitrile (1 mL). Yellowish oil, 28 mg (45%).

$^1\text{H-NMR}$  (500 MHz,  $\text{CDCl}_3$ )  $\delta$ : 2.61 (bs, 4H,  $(\text{CH}_2)_2\text{N}$ ), 2.63 (t, 2H,  $J = 6.4$  Hz,  $\text{CH}_2\text{N}$ ), 2.94 (bs, 4H,  $(\text{CH}_2)_2\text{N}$ ), 3.67 (t, 2H,  $J = 6.4$  Hz,  $\text{CH}_2\text{N}$ ), 3.76 (s, 3H,  $\text{OCH}_3$ ), 4.34 (s, 2H,  $\text{Ar-CH}_2$ ), 6.82 (dd, 1H,  $J = 7.4, 2.2$  Hz,  $\text{ArH}$ ), 6.98-7.05 (m, 3H,  $\text{ArH}$ ), 7.23 (dd, 1H,  $J = 8.8, 0.5$  Hz,  $\text{ArH}$ ), 7.46 (d, 1H,  $J = 2.4$  Hz,  $\text{ArH}$ ).  $^{13}\text{C-NMR}$  (125 MHz,  $\text{CDCl}_3$ )  $\delta$ : 37.0, 50.3, 51.3, 53.3, 55.7, 56.6, 106.5, 118.6, 119.6, 123.4, 124.6, 127.4, 127.5, 133.6, 134.0, 134.2, 151.2, 160.0, 168.5. LCMS:  $m/z$  420.12 ( $[\text{M}+\text{H}]^+$ , 100%); Rt 5.6 min, purity >99% DAD (180-450 nm). HRMS: Found 420.1240  $\text{C}_{21}\text{H}_{24}\text{Cl}_2\text{N}_3\text{O}_2$   $[\text{M} + \text{H}]^+$  requires 420.1240. Converted to HCl salt for assay.

## 1.5 Compound 5

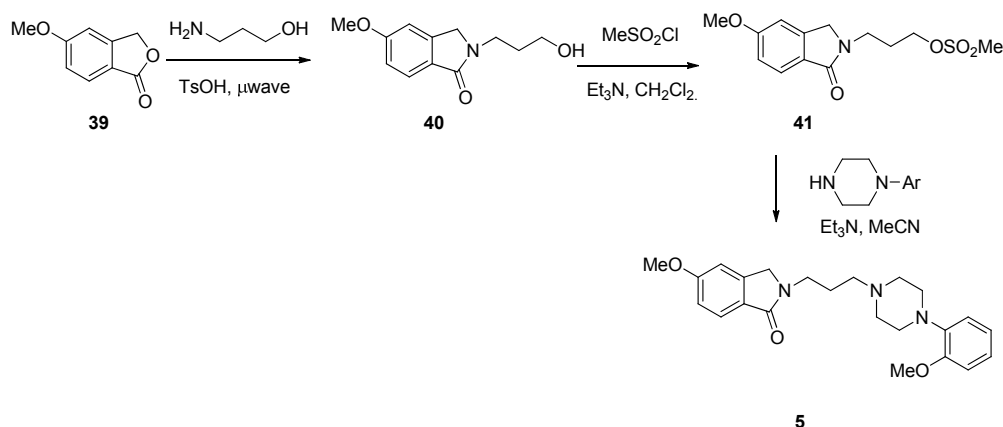

Scheme S5

### 2-(3-Hydroxypropyl)-5-methoxyisoindolin-1-one (40)

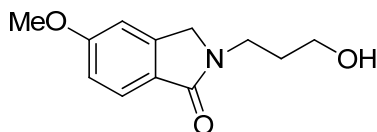

General procedure A starting from (5-methoxy)isobenzofuranone **39** (100 mg, 0.61 mmol), 3-amino-1-propanol (0.093 mL, 1.21 mmol), *p*-toluenesulfonic acid (11 mg, 0.15 mmol). Compound **40** was isolated as a colourless oil, 33 mg (24%).

$^1\text{H-NMR}$  (500 MHz,  $\text{CDCl}_3$ )  $\delta$ : 1.82 (qt, 2H,  $J = 6.0$  Hz,  $\text{CH}_2$ ), 3.57 (t, 2H,  $J = 5.7$  Hz,  $\text{CH}_2$ ), 3.73 (t, 2H,  $J = 6.3$  Hz,  $\text{CH}_2$ ), 3.87 (s, 3H,  $\text{OCH}_3$ ), 4.35 (s, 2H,  $\text{Ar-CH}_2$ ), 6.93 (d, 1H,  $J = 1.7$  Hz,  $\text{ArH}$ ), 6.97 (dd, 1H,  $J = 8.4, 2.2$  Hz,  $\text{ArH}$ ), 7.73 (d, 1H,  $J = 8.4$  Hz,  $\text{ArH}$ ).  $^{13}\text{C-NMR}$  (125 MHz,  $\text{CDCl}_3$ )  $\delta$ : 29.6, 30.8, 38.7, 55.6, 58.3, 107.7, 114.7, 124.8, 124.9, 143.5, 162.0, 169.6. LCMS:  $m/z$  222.10 ( $[\text{M}+\text{H}]^+$ , 100%); Rt 0.6 min, purity >99% DAD (180-450 nm).

### 3-(5-Methoxy-1-oxoisoindolin-2-yl)propyl methanesulfonate (41)

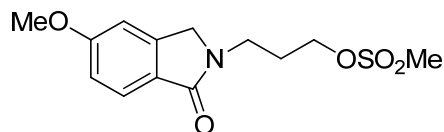

General procedure B from alcohol **40** (33 mg, 0.15 mmol), mesyl chloride (0.14 mL, 0.179 mmol), triethylamine (0.025 mL, 0.179 mmol) and dichloromethane (1 mL). Compound **41** was obtained as colourless oil, 40 mg (89%), used for the next step without purification.

LRMS:  $m/z$  300.09 ( $[\text{M}+\text{H}]^+$ , 100%).

### 5-Methoxy-2-(3-(4-(2-methoxyphenyl)piperazin-1-yl)propyl)isoindolin-1-one (5)

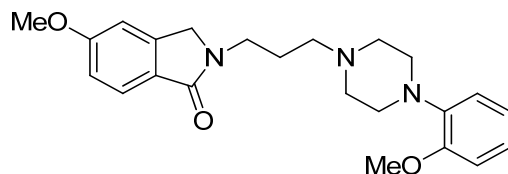

General procedure C from mesylate **41** (40 mg, 0.13 mmol), (2-methoxyphenyl)piperazine (26 mg, 0.20 mmol), triethylamine (0.038 mL, 0.27 mmol) and acetonitrile (1.5 mL). Yellowish oil, 10 mg (19%).

$^1\text{H-NMR}$  (500 MHz,  $\text{CDCl}_3$ )  $\delta$ : 1.93 (qt, 2H,  $J = 7.4$  Hz,  $\text{CH}_2$ ), 2.52 (t, 2H,  $J = 7.4$  Hz,  $\text{CH}_2$ ), 2.68 (bs, 4H,  $(\text{CH}_2)_2\text{N}$ ), 3.09 (bs, 4H,  $(\text{CH}_2)_2\text{N}$ ), 3.68 (t, 2H,  $J = 7.1$  Hz,  $\text{CH}_2$ ), 3.88 (s, 3H,  $\text{OCH}_3$ ), 3.89 (s, 3H,  $\text{OCH}_3$ ), 4.38 (s, 2H, Ar- $\text{CH}_2$ ), 6.91-6.96 (m, 3H, ArH), 6.99-7.03 (m, 3H, ArH), 7.29 (d, 1H,  $J = 0.6$  Hz, ArH).  $^{13}\text{C-NMR}$  (125 MHz,  $\text{CDCl}_3$ )  $\delta$ : 25.9, 40.8, 49.9, 50.6, 53.5, 55.4, 55.6, 55.9, 107.7, 111.2, 114.5, 118.2, 121.0, 122.9, 124.9, 125.7, 141.3, 143.4, 152.3, 162.6, 168.5. LCMS:  $m/z$  396.24 ( $[\text{M}+\text{H}]^+$ , 100%); Rt 0.7 min, purity >99% DAD (180-450 nm). HRMS: Found 396.2294  $\text{C}_{23}\text{H}_{30}\text{N}_3\text{O}_3$   $[\text{M} + \text{H}]^+$  requires 396.2282. Converted to HCl salt for assay.

## 1.6 Compound 7

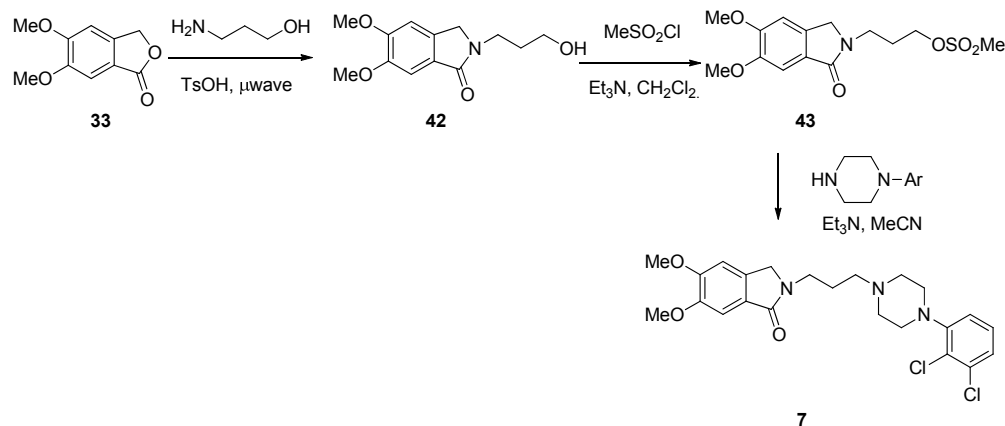

Scheme S6

### 2-(3-Hydroxypropyl)-5,6-dimethoxyisobenzofuranone (42)

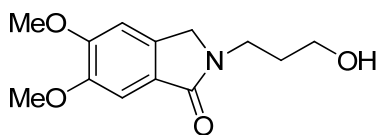

General procedure A starting from (5,6-dimethoxy)isobenzofuranone **33** (100 mg, 0.51 mmol), 3-amino-1-propanol (0.078 mL, 1.02 mmol), *p*-toluenesulfonic acid (19 mg, 0.1 mmol) and toluene (0.5 mL). Compound **42** was obtained as a colourless oil, 12 mg (8%).

LRMS: m/z 252.13 ( $[M+H]^+$ , 100%).

### 3-(5,6-Dimethoxy-1-oxoisindolin-2-yl)propyl methanesulfonate (43)

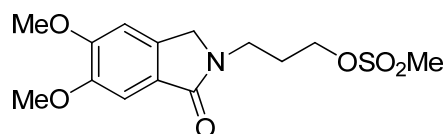

General procedure B from alcohol **42** (12 mg, 0.047 mmol), mesyl chloride (0.04 mL, 0.05 mmol), triethylamine (0.08 mL, 0.06 mmol) and dichloromethane (1 mL). Colourless oil, 32 mg crude used for the next step without further purification.

### 2-(3-(4-(2,3-Dichlorophenyl)piperazin-1-yl)propyl)-5,6-dimethoxyisindolin-1-one (7)

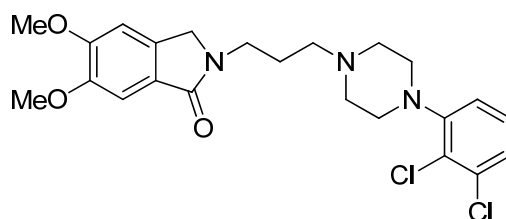

General procedure C from the crude mesylate **43** (32 mg, 0.099 mmol), (2,3-dichlorophenyl)piperazine (29 mg, 0.10 mmol), triethylamine (0.034 mL, 0.24 mmol) and acetonitrile (0.5 mL). Yellowish solid, 28 mg (67%).

$^1\text{H-NMR}$  (500 MHz,  $\text{CDCl}_3$ )  $\delta$ : 1.83 (qt, 2H,  $J = 7.4$  Hz,  $\text{CH}_2$ ), 2.43 (t, 2H,  $J = 7.4$  Hz,  $\text{CH}_2\text{N}$ ), 2.57 (bs, 4H,  $(\text{CH}_2)_2\text{N}$ ), 2.98 (bs, 4H,  $(\text{CH}_2)_2\text{N}$ ), 3.61 (t, 2H,  $J = 7.4$  Hz,  $\text{CH}_2\text{N}$ ), 3.87 (s, 3H,  $\text{OCH}_3$ ), 3.88 (s, 3H,  $\text{OCH}_3$ ), 4.26 (s, 2H, Ar- $\text{CH}_2$ ), 6.85-6.87 (m, 2H, ArH), 7.04-7.09 (m, 2H, ArH), 7.25 (s, 1H, ArH).

$^{13}\text{C-NMR}$  (125 MHz,  $\text{CDCl}_3$ )  $\delta$ : 26.0, 28.4, 31.0, 33.5, 37.9, 38.5, 40.8, 44.5, 51.3, 53.3, 56.3, 105.4, 118.6, 124.4, 127.4, 134.9, 140.3, 145.7, 154.4, 164.5. LCMS: m/z 464.16 ( $[M+H]^+$ , 100%); Rt 6.5 min, purity >99% DAD (180-450 nm). Converted to HCl salt for assay.

## 2. Synthesis of benzolactam analogues

The benzolactam series was prepared according to scheme S7.

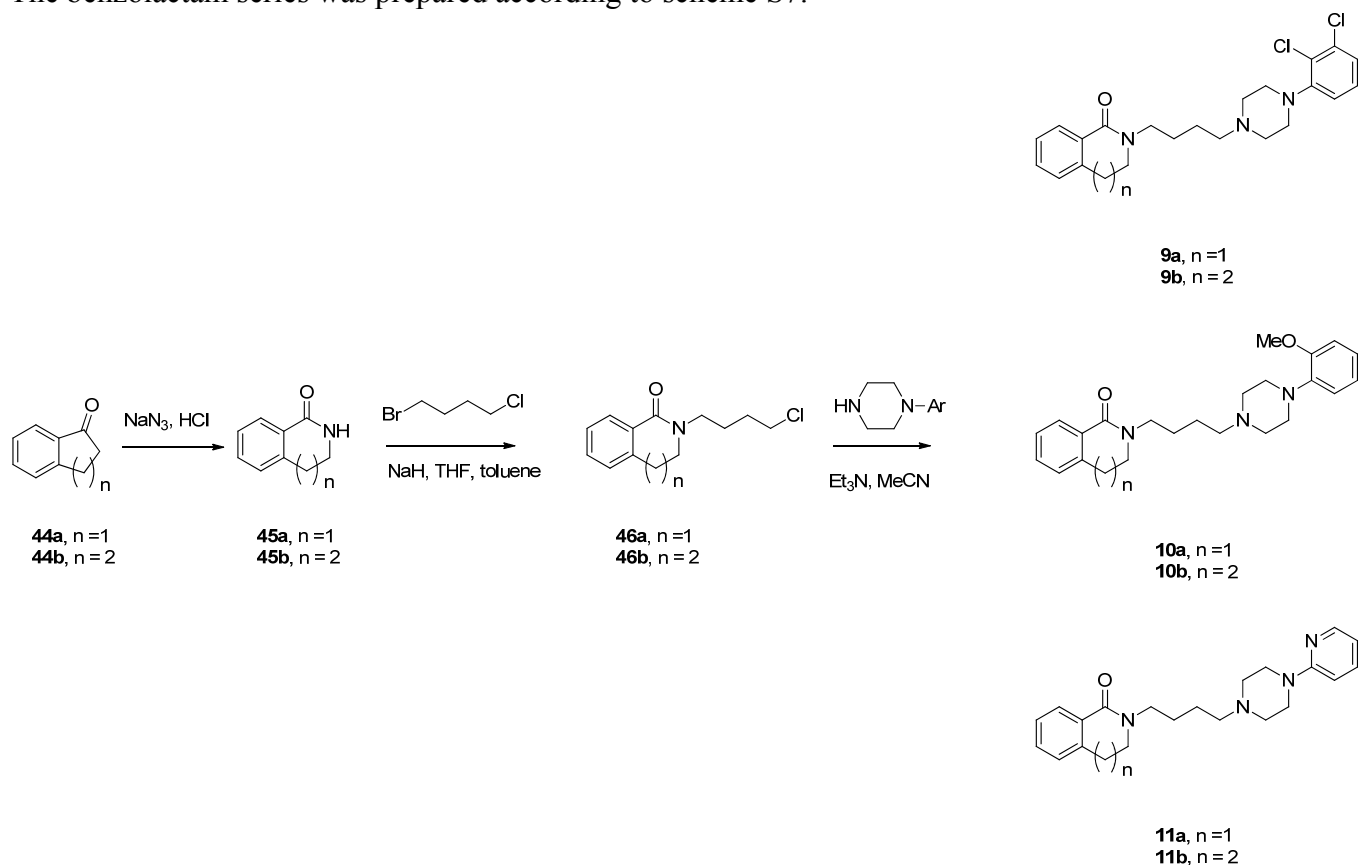

Scheme S7

### 3,4-Dihydroisoquinolin-1(2H)-one (**45a**)

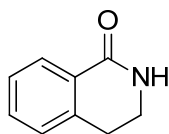

Compound **45a** was synthesised following the reported methods<sup>1,2</sup> using  $\alpha$ -Indanone **44a** (1 g, 7.56 mmol),  $\text{NaN}_3$  (983 mg, 15.13 mmol) and conc. HCl (19 mL). Purified by flash column chromatography (Silica, Pet. Ether/DCM 1:0 to 4:6). Off-white solid, 410 mg (37%).

$^1\text{H-NMR}$  (500 MHz,  $\text{CDCl}_3$ )  $\delta$ : 3.02 (t, 2H,  $J = 6.6$  Hz, Ar- $\text{CH}_2$ ), 3.60 (dt,  $J = 6.6, 2.90$  Hz,  $\text{CH}_2\text{NH}$ ), 6.39 (bs, 1H,  $\text{NH}$ ), 7.23-7.25 (m, 1H, Ar $\text{H}$ ), 7.38 (t, 1H,  $J = 8.2, 0.6, 0.5$  Hz, Ar $\text{H}$ ), 7.47 (dt, 1H,  $J = 7.5, 1.5$  Hz, Ar $\text{H}$ ), 8.10 (dd, 1H,  $J = 7.7, 1.1$  Hz, Ar $\text{H}$ ).  $^{13}\text{C-NMR}$  (125 MHz,  $\text{CDCl}_3$ )  $\delta$ : 28.4, 40.2, 127.0, 127.2, 128.0, 132.1, 138.8, 166.3. LCMS:  $m/z$  148.07 ( $[\text{M}+\text{H}]^+$ , 100%); Rt 4.0 min, purity >99% DAD (180-450 nm).

### 2,3,4,5-Tetrahydro-1H-benzo[c]azepin-1-one (**45b**).



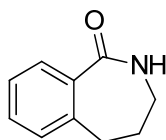

Same procedure as for compound **45a** with  $\alpha$ -tetralone **44b** (1 g, 6.84 mmol),  $\text{NaN}_3$  (890 mg, 13.7 mmol) and conc. HCl (17 mL). Purified by flash column chromatography (Silica, Pet. Ether/DCM 0:1 to 4:6). Off-white solid, 435 mg (39%).

$^1\text{H-NMR}$  (500 MHz,  $\text{CDCl}_3$ )  $\delta$ : 2.05 (qt, 2H,  $J = 6.9$  Hz,  $\text{CH}_2$ ), 2.89 (t, 2H,  $J = 7.1$  Hz,  $\text{CH}_2$ ), 3.14 (q, 2H,  $J = 6.5$  Hz,  $\text{CH}_2$ ), 6.58 (bs, 1H,  $\text{NH}$ ), 7.21 (d, 1H,  $J = 7.4$  Hz,  $\text{ArH}$ ), 7.37 (dt, 1H,  $J = 1.3, 7.5$  Hz,  $\text{ArH}$ ), 7.43 (dt, 1H,  $J = 7.4, 1.5$  Hz,  $\text{ArH}$ ), 7.73 (dd, 1H,  $J = 7.6, 1.4$  Hz,  $\text{ArH}$ ). LCMS:  $m/z$  162.09 ( $[\text{M}+\text{H}]^+$ , 100%); Rt 4.2 min, purity >99% DAD (180-450 nm).

### 2-(4-Chlorobutyl)-3,4-dihydroisoquinolin-1(2H)-one (**46a**)

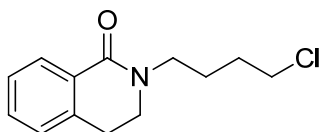

NaH (95%, 74 mg, 3.06 mmol) was added to a solution of lactam **45a** (410 mg, 2.78 mmol), 4-chloro-1-bromo butane (0.35 mL, 3.06 mmol) in 1:1 THF/toluene (8 mL). The reaction was irradiated with microwaves for 1 h at 100 °C. After quenching with water, the phases were separated and the organic layer was filtered and concentrated to dryness. The residue was purified by flash column chromatography (Silica, DCM/MeOH 99:1 to 95:5). Yellowish oil, 269 mg (41%).

$^1\text{H-NMR}$  (500 MHz,  $\text{CDCl}_3$ )  $\delta$ : 1.78-1.86 (m, 4H, 2 x  $\text{CH}_2$ ), 2.99 (t, 2H,  $J = 6.9$  Hz,  $\text{CH}_2$ ), 3.55 (t, 2H,  $J = 6.9$  Hz,  $\text{CH}_2$ ), 3.58-3.62 (m, 4H, 2 x  $\text{CH}_2$ ), 7.17 (d, 1H,  $J = 8.0$  Hz,  $\text{ArH}$ ), 7.33 (t, 1H,  $J = 7.5$  Hz,  $\text{ArH}$ ), 7.40 (dt, 1H,  $J = 7.4, 1.4$  Hz,  $\text{ArH}$ ), 8.07 (d, 1H,  $J = 7.7$  Hz,  $\text{ArH}$ ).  $^{13}\text{C-NMR}$  (125 MHz,  $\text{CDCl}_3$ )  $\delta$ : 24.9, 28.2, 29.8, 44.7, 45.9, 46.3, 126.9, 127.0, 128.2, 129.5, 131.6, 137.9, 164.4. LCMS:  $m/z$  238.0 ( $[\text{M}+\text{H}]^+$ , 100%); Rt 4.8 min, purity >99% DAD (180-450 nm).

### 2-(4-Chlorobutyl)-2,3,4,5-tetrahydro-1H-benzo[c]azepin-1-one (**46b**)

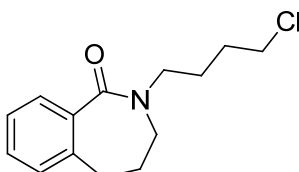

Same procedure as compound **46a** with lactam **45b** (418 mg, 2.59 mmol), 4-chloro-1-bromo butane (0.47 mL, 3.88 mmol) in 1:1 THF/Toluene (10 mL). Compound **46b** was isolated as a colourless oil, 322 mg (49%).

$^1\text{H-NMR}$  (500 MHz,  $\text{CDCl}_3$ )  $\delta$ : 1.80-1.92 (m, 4H, 2 x  $\text{CH}_2$ ), 2.06 (qt, 2H,  $J = 6.7$  Hz,  $\text{CH}_2$ ), 2.80 (t, 2H,  $J = 7.1$  Hz,  $\text{CH}_2$ ), 3.23 (t, 2H,  $J = 6.5$  Hz,  $\text{CH}_2$ ), 3.62-3.65 (m, 4H, 2 x  $\text{CH}_2$ ), 7.15 (dd, 1H,  $J = 7.3, 0.9$  Hz,  $\text{ArH}$ ), 7.33 (dt, 1H,  $J = 7.5, 1.5$ ,  $\text{ArH}$ ), 7.37 (dt, 1H,  $J = 7.4, 1.5$  Hz,  $\text{ArH}$ ), 7.67 (dd, 1H,  $J = 7.4, 1.4$ ,  $\text{ArH}$ ). LCMS:  $m/z$  252.0 ( $[\text{M}+\text{H}]^+$ , 100%); Rt 4.9 min, purity >85% DAD (180-450 nm).

### 2-(4-(4-(2,3-Dichlorophenyl)piperazin-1-yl)butyl)-3,4-dihydroisoquinolin-1(2H)-one (**9a**)

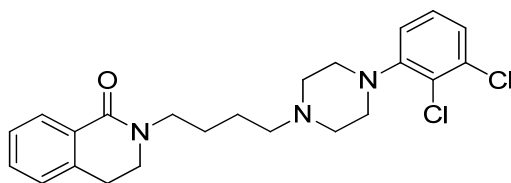

General procedure C from chloride **46a** (90 mg, 0.38 mmol), (3-chlorophenyl)piperazine hydrochloride (122 mg, 0.46 mmol), triethylamine (0.105 mL, 0.76 mmol) and acetonitrile (2 mL). Colourless oil, 101 mg (61%).

$^1\text{H-NMR}$  (500 MHz,  $\text{CDCl}_3$ )  $\delta$ : 1.64-1.66 (m, 2H,  $\text{CH}_2$ ), 1.69-1.75 (m, 2H,  $\text{CH}_2$ ), 2.49 (t, 2H,  $J = 7.1$  Hz,  $\text{CH}_2$ ), 2.66 (bs, 4H,  $(\text{CH}_2)_2\text{N}$ ), 3.01 (t, 2H,  $J = 6.6$  Hz,  $\text{CH}_2$ ), 3.08 (bs, 4H,  $(\text{CH}_2)_2\text{N}$ ), 3.59 (t, 2H,  $J = 7.0$  Hz,  $\text{CH}_2$ ), 3.63 (t, 2H,  $J = 7.4$  Hz,  $\text{CH}_2$ ), 6.97 (dd, 1H,  $J = 6.9, 2.6$  Hz,  $\text{ArH}$ ), 7.14-7.20 (m, 3H,  $\text{ArH}$ ), 7.36 (t, 1H,  $J = 7.6$  Hz,  $\text{ArH}$ ), 7.43 (dt, 1H,  $J = 7.4, 1.4$ ,  $\text{ArH}$ ), 8.10 (d, 1H,  $J = 11.7$  Hz,  $\text{ArH}$ ).  $^{13}\text{C-NMR}$  (125 MHz,  $\text{CDCl}_3$ )  $\delta$ : 24.3, 25.8, 28.2, 46.1, 47.3, 51.3, 53.3, 58.3, 118.6, 124.5, 126.8, 127.0, 127.4, 127.5, 128.24, 129.7, 131.5, 134.0, 137.9, 151.35, 164.31. LCMS:  $m/z$  432.1 ( $[\text{M}+\text{H}]^+$ , 100%); Rt 5.7 min, purity >99% DAD (180-450 nm). Converted to HCl salt for assay.

**2-(4-(4-(2,3-Dichlorophenyl)piperazin-1-yl)butyl)-2,3,4,5-tetrahydro-1H-benzo[c]azepin-1-one (9b)**

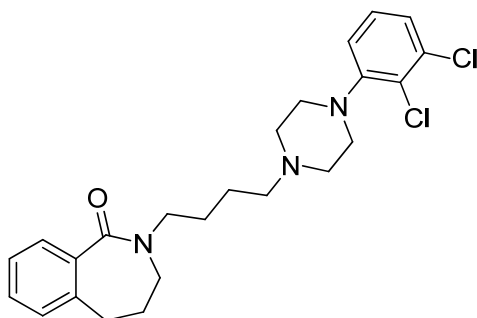

General procedure C from chloride **46b** (95 mg, 0.38 mmol), (3-chlorophenyl)piperazine hydrochloride (122 mg, 0.46 mmol), triethylamine (0.105 mL, 0.76 mmol) and acetonitrile (2 mL). Colourless oil, 117 mg (69%).

$^1\text{H-NMR}$  (500 MHz,  $\text{CDCl}_3$ )  $\delta$ : 1.62-1.76 (m, 4H, 2 x  $\text{CH}_2$ ), 2.06 (qt, 2H,  $J = 6.8$  Hz,  $\text{CH}_2$ ), 2.51 (t, 2H,  $J = 7.5$  Hz,  $\text{CH}_2$ ), 2.67 (bs, 4H,  $(\text{CH}_2)_2\text{N}$ ), 2.82 (t, 2H,  $J = 7.1$  Hz,  $\text{CH}_2$ ), 3.10 (bs, 4H, 2 x  $\text{CH}_2$ ), 3.23 (t, 2H,  $J = 6.5$  Hz,  $\text{CH}_2\text{N}$ ), 3.63 (t, 2H,  $J = 7.4$  Hz,  $\text{CH}_2\text{N}$ ), 6.98 (dd, 1H,  $J = 6.8, 2.7$  Hz,  $\text{ArH}$ ), 7.14-7.17 (m, 3H,  $\text{ArH}$ ), 7.32-7.40 (m, 2H,  $\text{ArH}$ ), 7.69 (dd, 1H,  $J = 7.4, 1.7$  Hz,  $\text{ArH}$ ).  $^{13}\text{C-NMR}$  (125 MHz,  $\text{CDCl}_3$ )  $\delta$ : 24.4, 26.9, 30.0, 30.3, 46.2, 47.2, 51.4, 53.4, 58.3, 118.6, 124.5, 126.9, 127.4, 128.1, 128.6, 130.6, 136.5, 137.2, 170.9. LCMS:  $m/z$  446.18 ( $[\text{M}+\text{H}]^+$ , 100%); Rt 5.7 min, purity >99% DAD (180-450 nm). Converted to HCl salt for assay.

**2-(4-(4-(2-Methoxyphenyl)piperazin-1-yl)butyl)-3,4-dihydroisoquinolin-1(2H)-one (10a)**

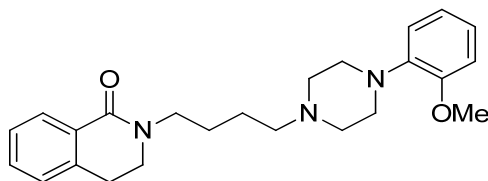

General procedure C from chloride **46a** (90 mg, 0.38 mmol), (2-methoxyphenyl)piperazine (88 mg, 0.46 mmol), triethylamine (0.105 mL, 0.76 mmol) and acetonitrile (2 mL). Colourless oil, 84 mg (56%).

<sup>1</sup>H-NMR (500 MHz, CDCl<sub>3</sub>) δ: 1.60-1.74 (m, 4H, 2 x CH<sub>2</sub>), 2.49 (t, 2H, *J* = 7.1 Hz, CH<sub>2</sub>), 2.68 (bs, 4H, (CH<sub>2</sub>)<sub>2</sub>N), 3.01 (t, 2H, *J* = 6.6 Hz, CH<sub>2</sub>), 3.12 (bs, 4H, (CH<sub>2</sub>)<sub>2</sub>N), 3.59 (t, 2H, *J* = 6.6 Hz, CH<sub>2</sub>), 3.63 (t, 2H, *J* = 7.3 Hz, CH<sub>2</sub>), 3.88 (s, 3H, OCH<sub>3</sub>), 6.88 (d, 1H, *J* = 7.9, ArH), 6.92-7.03 (m, 3H, ArH), 7.19 (d, 2H, *J* = 7.2 Hz, ArH), 7.36 (t, 1H, *J* = 7.4 Hz, ArH), 7.42 (dt, 1H, *J* = 7.4, 1.4 Hz, ArH), 8.10 (d, 1H, *J* = 7.7 Hz, ArH). <sup>13</sup>C-NMR (125 MHz, CDCl<sub>3</sub>) δ: 24.3, 25.8, 28.2, 46.1, 47.3, 50.6, 51.3, 53.3, 55.3, 58.3, 118.6, 124.5, 126.8, 127.0, 127.4, 127.5, 128.24, 129.7, 131.5, 134.0, 137.9, 151.35, 164.31. LCMS: *m/z* 394.2 ([M+H]<sup>+</sup>, 100%), Rt 5.2 min, purity >99% DAD (180-450 nm). Converted to HCl salt for assay.

### 2-(4-(4-(2-Methoxyphenyl)piperazin-1-yl)butyl)-2,3,4,5-tetrahydro-1H-benzo[c]azepin-1-one (10b)

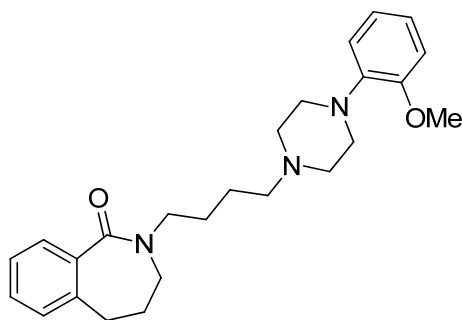

General procedure C from chloride **46b** (95 mg, 0.38 mmol), (2-methoxyphenyl)piperazine (88 mg, 0.46 mmol), triethylamine (0.105 mL, 0.76 mmol) and acetonitrile (2 mL). Colourless oil, 100 mg (64%).

<sup>1</sup>H-NMR (500 MHz, CDCl<sub>3</sub>) δ: 1.65-1.77 (m, 4H, 2 x CH<sub>2</sub>), 2.06 (qt, 2H, *J* = 6.8 Hz, CH<sub>2</sub>), 2.51 (bs, 2H, CH<sub>2</sub>), 2.70 (bs, 4H, (CH<sub>2</sub>)<sub>2</sub>N), 2.82 (t, 2H, *J* = 7.1 Hz, CH<sub>2</sub>), 3.13 (bs, 4H, 2 x CH<sub>2</sub>), 3.23 (t, 2H, *J* = 6.4 Hz, CH<sub>2</sub>N), 3.63 (t, 2H, *J* = 7.4 Hz, CH<sub>2</sub>N), 3.89 (s, 3H, OCH<sub>3</sub>), 6.89 (dd, 1H, *J* = 8.0, 1.8 Hz, ArH), 6.92-7.04 (m, 3H, ArH), 7.16 (dd, 1H, *J* = 7.4, 1 Hz, ArH), 7.33 (dt, 1H, *J* = 7.4, 1.5 Hz, ArH), 7.38 (dt, 1H, *J* = 7.4, 1.5 Hz, ArH), 7.68 (dd, 1H, *J* = 7.4, 4.2 Hz, ArH). <sup>13</sup>C-NMR (125 MHz, CDCl<sub>3</sub>) δ: 26.0, 27.0, 30.0, 30.3, 46.2, 50.6, 52.8, 53.5, 55.4, 107.9, 111.2, 114.2, 121.0, 122.9, 126.9, 128.1, 128.5, 130.6, 136.5, 146.1, 152.3, 161.5. LCMS: *m/z* 408.2 ([M+H]<sup>+</sup>, 100%); Rt 5.2 min, purity >99% DAD (180-450 nm). Converted to HCl salt for assay.

### 2-(4-(4-(Pyridin-2-yl)piperazin-1-yl)butyl)-3,4-dihydroisoquinolin-1(2H)-one (11a)

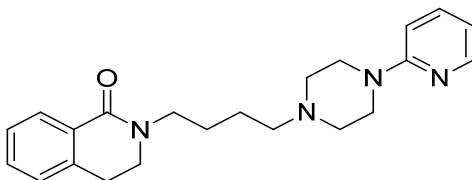

General procedure C from chloride **46a** (90 mg, 0.38 mmol), (2-pyridyl)piperazine (0.067 ml, 0.46 mmol), triethylamine (0.105 mL, 0.76 mmol) and acetonitrile (2 mL). Colourless oil, 84 mg (62%).

$^1\text{H-NMR}$  (500 MHz,  $\text{CDCl}_3$ )  $\delta$ : 1.60-1.74 (m, 4H, 2 x  $\text{CH}_2$ ), 2.46 (t, 2H,  $J = 7.3$  Hz,  $\text{CH}_2$ ), 2.57 (t, 4H,  $J = 5.0$  Hz,  $(\text{CH}_2)_2\text{N}$ ), 3.01 (t, 2H,  $J = 6.6$  Hz,  $\text{CH}_2$ ), 3.55-3.60 (m, 6H,  $(\text{CH}_2)_2\text{N} + \text{CH}_2$ ), 3.63 (t, 2H,  $J = 7.1$  Hz,  $\text{CH}_2$ ), 6.64-6.61 (m, 1H,  $\text{ArH}$ ), 6.65 (dd, 1H,  $J = 8.6, 0.7$  Hz,  $\text{ArH}$ ), 7.19 (d, 2H,  $J = 8.1$  Hz,  $\text{ArH}$ ), 7.36 (t, 1H,  $J = 8$ ,  $\text{ArH}$ ), 7.42 (dt, 1H,  $J = 7.5, 1.4$  Hz,  $\text{ArH}$ ), 7.47-7.50 (m, 1H,  $\text{ArH}$ ), 8.09 (d, 1H,  $J = 8.1$  Hz,  $\text{ArH}$ ), 8.20 (m, 1H,  $\text{ArH}$ ).  $^{13}\text{C-NMR}$  (125 MHz,  $\text{CDCl}_3$ )  $\delta$ : 24.2, 25.8, 28.2, 45.2, 46.0, 47.2, 53.1, 58.4, 107.0, 113.2, 126.8, 127.0, 128.2, 129.7, 131.5, 137.4, 137.9, 147.9, 159.6, 164.3. LCMS:  $m/z$  365.2 ( $[\text{M}+\text{H}]^+$ , 100%); Rt 4.9 min, purity >99% DAD (180-450 nm). Converted to HCl salt for assay.

## 2-(4-(4-(Pyridin-2-yl)piperazin-1-yl)butyl)-2,3,4,5-tetrahydro-1H-benzo[c]azepin-1-one (11b)

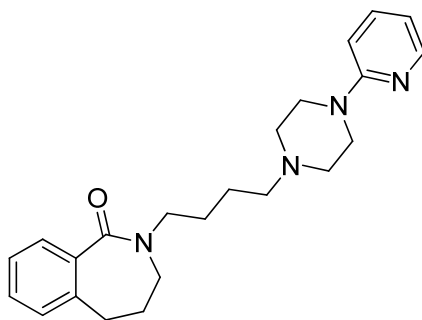

General procedure C from chloride **46b** (95 mg, 0.38 mmol), (2-pyridyl)piperazine (0.067 ml, 0.46 mmol), triethylamine (0.105 mL, 0.76 mmol) and acetonitrile (2 mL). Colourless oil, 116 mg (80%).

$^1\text{H-NMR}$  (500 MHz,  $\text{CDCl}_3$ )  $\delta$ : 1.62-1.77 (m, 4H, 2 x  $\text{CH}_2$ ), 2.06 (qt, 2H,  $J = 7.0$  Hz,  $\text{CH}_2$ ), 2.48 (t, 2H,  $J = 7.4$  Hz,  $\text{CH}_2$ ), 2.59 (t, 4H,  $J = 5.0$  Hz, 2 x  $(\text{CH}_2)_2\text{N}$ ), 3.23 (t, 2H,  $J = 6.5$  Hz,  $\text{CH}_2$ ), 3.58 (t, 4H,  $J = 5.0$  Hz,  $(\text{CH}_2)_2\text{N}$ ), 3.64 (t, 2H,  $J = 7.2$  Hz,  $\text{CH}_2$ ), 6.25-6.65 (m, 1H,  $\text{ArH}$ ), 6.67 (d, 1H,  $J = 8.6$  Hz,  $\text{ArH}$ ), 7.15 (dd, 1H,  $J = 8.1, 1.5$  Hz,  $\text{ArH}$ ), 7.34 (dt, 1H,  $J = 7.5, 1.5$  Hz,  $\text{ArH}$ ), 7.38 (dt, 1H,  $J = 7.4, 1.4$  Hz,  $\text{ArH}$ ), 7.47-7.51 (m, 1H,  $\text{ArH}$ ), 7.69 (dd, 1H,  $J = 7.4, 1.6$  Hz,  $\text{ArH}$ ), 8.20-8.22 (m, 1H,  $\text{ArH}$ ).  $^{13}\text{C-NMR}$  (125 MHz,  $\text{CDCl}_3$ )  $\delta$ : 24.3, 26.9, 30.0, 30.3, 45.2, 46.2, 53.1, 58.4, 96.7, 101.4, 107.0, 113.2, 118.9, 126.9, 128.1, 128.6, 130.6, 137.4, 137.4, 147.9, 159.6, 164.3. LCMS:  $m/z$  379.2 ( $[\text{M}+\text{H}]^+$ , 100%); Rt 4.1 min, purity >97% DAD (180-450 nm). Converted to HCl salt for assay.

## 3. 2-Methyl-Indole

Compounds 12 and 13 were obtained from Innovapharm Ltd. (Kiev, Ukraine).

The compound 13 was freeze-dried and converted to the HCl salt for assay, giving satisfactory LCMS and  $^1\text{H NMR}$ .

## 4. Synthesis of morpholino analogues

The morpholino series was made according to the general scheme S8.

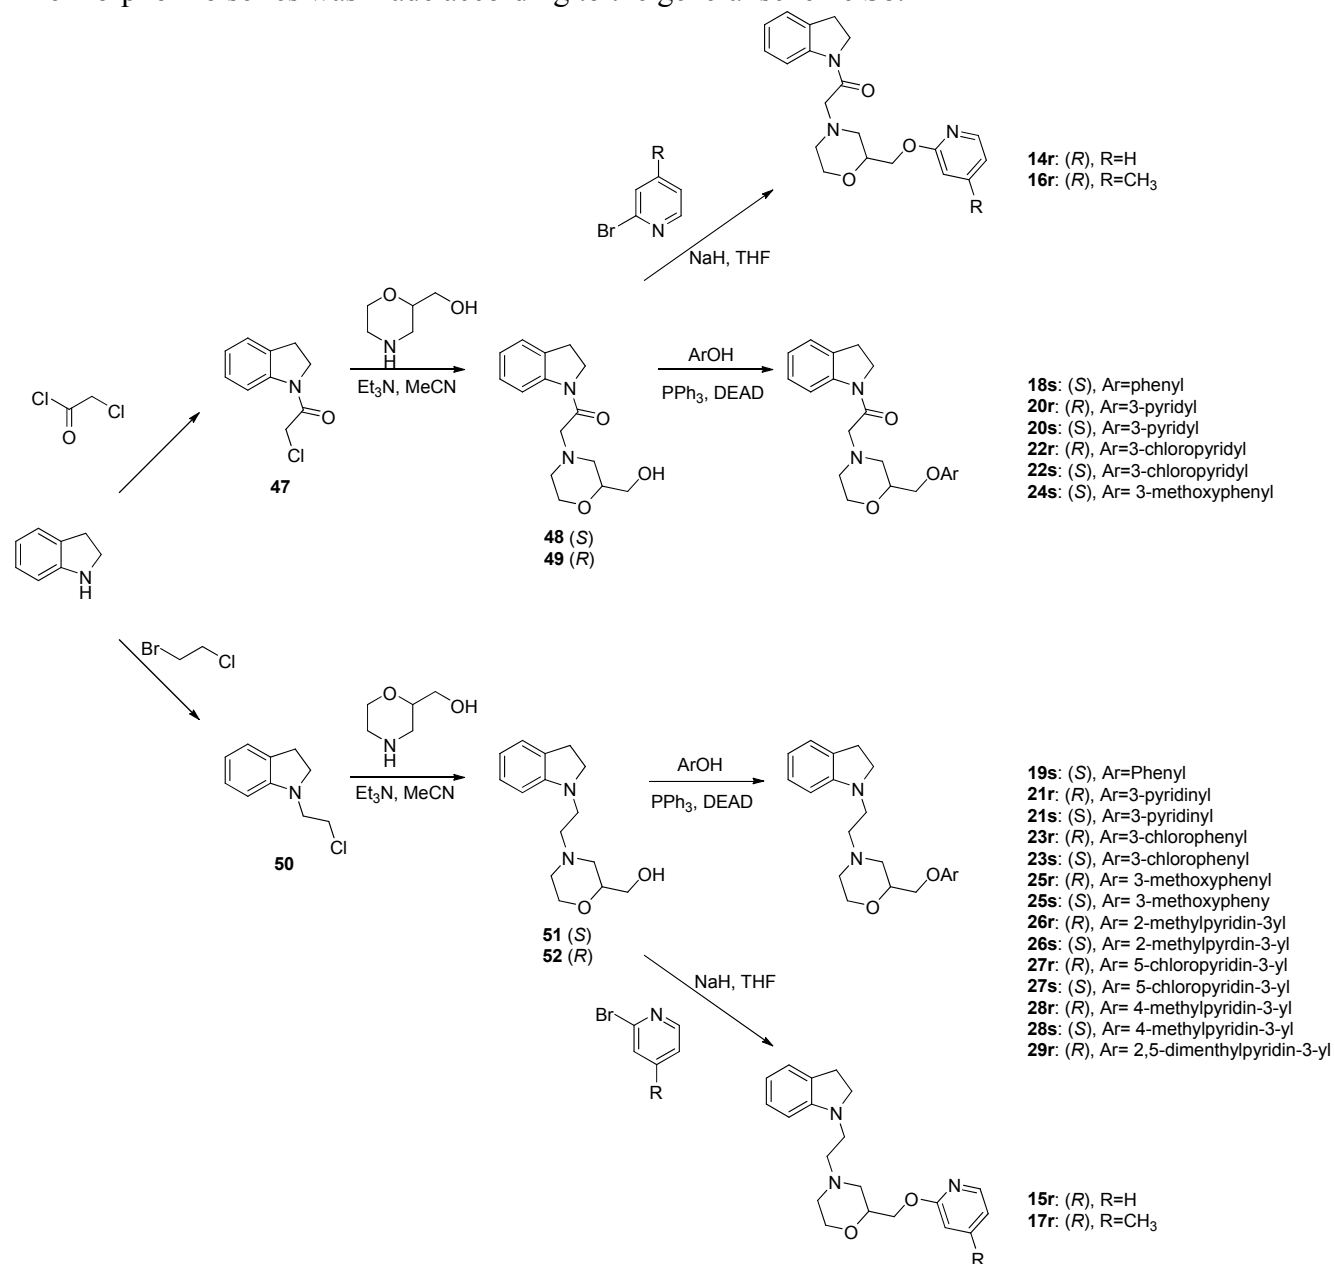

Scheme S8

The first step was to prepare the morpholino core; both enantiomers were prepared according to scheme S9<sup>3</sup>.

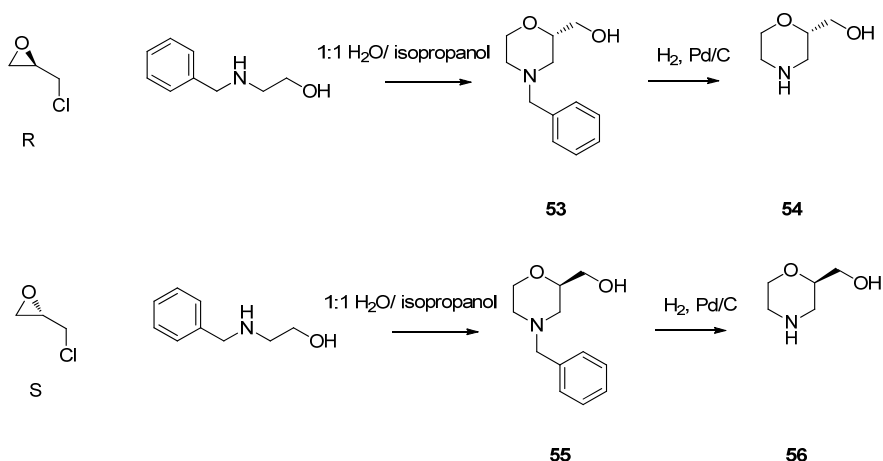

Scheme S9

**(S)-(4-benzylmorpholin-2-yl)methanol (53)**

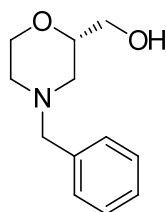

(*R*)-Epichlorohydrin (1.7 ml, 21.6 mmol) was added to a solution of *N*-benzyloethanolamine (3.73 mL, 25.7 mmol) in 1:1 water/isopropanol (7 mL), keeping the temperature between 20-25 °C. After 6 h, the milky suspension was stored at -20 °C overnight. The solution was allowed to come to room temperature before 40% tetraethylammonium hydroxide in water (12.3 mL) was added. The mixture was stirred at 20 °C for 1 h and then quenched with 1M HCl (4 mL), keeping the pH around 10. The suspension was diluted with water (7 mL) and extracted with dichloromethane (3x13 mL). The combined organic layers were dried and concentrated. The residue was purified by flash column chromatography (Silica, DCM/MeOH 1:0 to 92:8). The product was isolated from the slow eluting fraction as a colourless oil, 2.3 g (52%).

<sup>1</sup>H-NMR (500 MHz, CDCl<sub>3</sub>) δ: 2.03 (dd + bs, 2H, *J* = 11.5, 9.9 Hz, *OH* + *CHHN*), 2.22 (dt, 1H, *J* = 11.5, 3.3 Hz, *CHHN*), 2.68-2.73 (m, 2H, *CH<sub>2</sub>N*), 3.53 (AB syst., 2H, *CH<sub>2</sub>-Ph*), 3.56-3.71 (m, 3H, *CH<sub>2</sub>OCH<sub>2</sub>*), 3.73 (dt, 1H, *J* = 11.2, 2.5 Hz, *CHHOH*), 3.91-3.94 (m, 1H, *CHHOH*), 7.27-7.30 (m, 1H, *ArH*), 7.33-7.35 (m, 4H, *ArH*). <sup>13</sup>C-NMR (125 MHz, CDCl<sub>3</sub>) δ: 53.1, 54.6, 63.4, 64.3, 66.7, 76.0, 127.2, 128.3, 129.2, 137.6. LCMS: *m/z* 208.14 ([*M*+*H*]<sup>+</sup>, 100%); Rt 3.6 min, purity >99% DAD (180-450 nm).

**(R)-(4-benzylmorpholin-2-yl)methanol (55)**

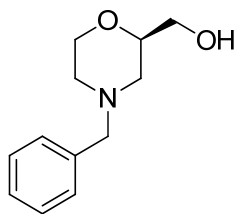

Same procedure as for compound **53** with (S)-Epichlorohydrin (2.5 g, 2.70 mmol), N-benzylethanolamine (3.73 mL, 2.60 mmol) and tetraethylammonium hydroxide (12.3 mL). Compound **55** was obtained as a colourless oil, 2.7 g (50%).

For NMR data see **53** LCMS:  $m/z$  208.1 ( $[M+H]^+$ , 100%); Rt 3.8 min, purity >99% DAD (180-450 nm).

#### (S)-morpholin-2-ylmethanol (**54**)

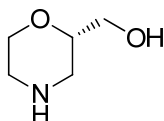

Benzyl ether **53** (960 mg, 4.61 mmol) was stirred for 4 h under the pressure of 50 psi of hydrogen in the presence of 10% Pd/C (200 mg) in methanol (10 mL) After filtration through a celite pad and evaporation of the solvents, compound **54** was isolated as a colourless oil, 478 mg (88%).

$^1\text{H-NMR}$  (500 MHz,  $\text{CDCl}_3$ )  $\delta$ : 2.57 (bs, 2H,  $\text{NH} + \text{OH}$ ), 2.69-2.72 (m, 1H,  $\text{CHHN}$ ), 2.85-2.90 (m, 3H,  $\text{CH}_2\text{N} + \text{CHHN}$ ), 3.48-3.63 (m, 3H,  $\text{CH}_2\text{OCHCH}_2$ ), 3.66 (dt, 1H,  $J = 11.5, 3.3$  Hz,  $\text{CHHOH}$ ), 3.90-3.93 (m, 1H,  $\text{CHHOH}$ ).  $^{13}\text{C-NMR}$  (125 MHz,  $\text{CDCl}_3$ )  $\delta$ : 45.66, 47.33, 64.00, 67.66, 76.78. LCMS:  $m/z$  117.09 ( $[M+H]^+$ , 100%); Rt 0.5 min, purity >99% DAD (180-450 nm).

#### (R)-morpholin-2-ylmethanol (**56**)

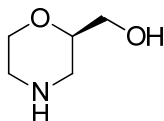

Same procedure as for compound **54** with compound **55** (1.4 g, 6.76 mmol), 10% Pd/C (350 mg), methanol (15 mL). After filtration through a celite pad and evaporation of the solvents, compound **56** was obtained as a colourless oil (712 mg, 88%).

For NMR data see **54**.

#### 2-Chloro-1-(indolin-1-yl)ethanone (**47**)

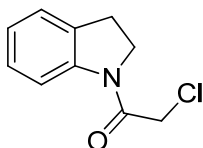

Chloroacetyl chloride (0.37 mL, 4.6 mmol) was added to a solution of indoline (0.47 mL, 4.19 mmol) and triethylamine (0.70 mL, 5.03 mmol) in dichloromethane (15 mL). The mixture was stirred for 3 h at room temperature and then quenched with water (5 mL). The phases were separated and the aqueous layer was extracted with dichloromethane (3x5 mL). The combined organic layers were dried over MgSO<sub>4</sub> and concentrated to a dark brown residue, 1g (quantitative), which was used for the next step without further purification.

<sup>1</sup>H-NMR (500 MHz, CDCl<sub>3</sub>) δ: 3.27 (t, 2H, *J* = 8.3 Hz, CH<sub>2</sub>), 4.17-4.21 (m, 4H, CH<sub>2</sub>Cl + CH<sub>2</sub>N), 7.09 (dt, 1H, *J* = 7.5, 1.0 Hz, ArH), 7.22-7.27 (m, 2H, ArH), 8.24 (d, 1H, *J* = 8.1 Hz, ArH). <sup>13</sup>C-NMR (125 MHz, CDCl<sub>3</sub>) δ: 28.2, 43.1, 47.9, 117.4, 124.5, 124.6, 127.7, 131.1, 142.5, 163.9. LCMS: *m/z* 196.06 ([M+H]<sup>+</sup>, 100%); Rt 4.8 min, purity >99% DAD (180-450 nm).

**(S)-2-(2-(Hydroxymethyl)morpholino)-1-(indolin-1-yl)ethanone (48)**

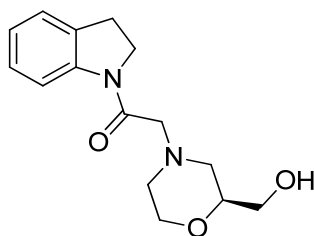

A microwave vial was charged with 1-(chloroacetyl)-indoline **47** (390 mg, 2.00 mmol), hydroxymethylmorpholine **54** (280 mg, 2.39 mmol), triethylamine (0.55 mL, 4.00 mmol) and acetonitrile (2 mL). The vial was sealed and irradiated for 30 min at 100 °C. The crude mixture was purified by flash column chromatography (Silica, DCM/MeOH 1:0 to 92:8). White solid, 435 mg (79%).

<sup>1</sup>H-NMR (500 MHz, CDCl<sub>3</sub>) δ: 1.97 (bs, 1H, OH), 2.23 (t, 1H, *J* = 10.5 Hz, 1 of 1 of (CH<sub>2</sub>)<sub>2</sub>N), 2.40 (dt, 1H, *J* = 11.0, 3.0 Hz, 1 of (CH<sub>2</sub>)<sub>2</sub>N), 2.88 (t, 2H, *J* = 13.0 Hz, 1 of (CH<sub>2</sub>)<sub>2</sub>N), 3.23 (t, 2H, *J* = 8.3 Hz, 1 of CH<sub>2</sub>N), 3.29 (AB syst, 2H, ArCH<sub>2</sub>), 3.56-3.69 (m, 2H, CH<sub>2</sub>OH), 3.74-3.82 (m, 2H, COCH<sub>2</sub>N), 3.94-3.97 (m, 1H, CHCH<sub>2</sub>), 4.18 (t, 2H, *J* = 8.5 Hz, CONCH<sub>2</sub>), 7.06 (dt, 1H, *J* = 7.4, 1.0 Hz, ArH), 7.21-7.24 (m, 2H, ArH), 8.25 (d, 1H, *J* = 8.1 Hz, ArH). <sup>13</sup>C-NMR (125 MHz, CDCl<sub>3</sub>) δ: 28.3, 47.4, 53.3, 54.8, 62.7, 64.1, 66.5, 75.9, 117.1, 123.9, 124.5, 127.6, 167.2. LCMS: *m/z* 277.1 ([M+H]<sup>+</sup>, 100%); Rt 4.2 min, purity >99% DAD (180-450 nm).

**(R)-2-(2-(hydroxymethyl)morpholino)-1-(indolin-1-yl)ethanone (49)**



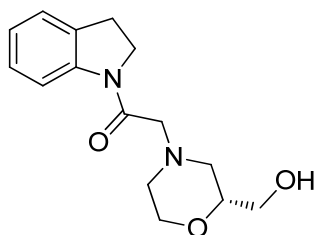

Same procedure as **48** with 1-(chloroacetyl)-indoline **47** (471 mg, 2.41 mmol), **56** (341 mg, 2.90 mmol), triethylamine (0.67 mL, 4.83 mmol) and acetonitrile (5 mL). Purified by flash column chromatography (Silica, DCM/MeOH 1:0 to 92:8). White solid, 376 mg (56%).

$^1\text{H-NMR}$  (500 MHz,  $\text{CDCl}_3$ )  $\delta$ : 1.97 (bs, 1H,  $\text{OH}$ ), 2.23 (t, 1H,  $J = 10.5$  Hz, 1 of 1 of ( $\text{CH}_2$ ) $_2\text{N}$ ), 2.40 (dt, 1H,  $J = 11.2, 3.2$  Hz, 1 of ( $\text{CH}_2$ ) $_2\text{N}$ ), 2.88 (t, 2H,  $J = 12.8$  Hz, 1 of ( $\text{CH}_2$ ) $_2\text{N}$ ), 3.23 (t, 2H,  $J = 8.4$  Hz, 1 of  $\text{CH}_2\text{N}$ ), 3.26-3.33 (m, 2H,  $\text{ArCH}$ ), 3.58-3.83 (m, 4H,  $\text{CH}_2\text{OH} + \text{COCH}_2\text{N}$ ), 3.91-3.97 (m, 1H,  $\text{CHCH}_2$ ), 4.18 (t, 2H,  $J = 8.2$  Hz,  $\text{CONCH}_2$ ), 7.05 (dt, 1H,  $J = 7.4, 1.0$  Hz,  $\text{ArH}$ ), 7.21-7.24 (m, 2H,  $\text{ArH}$ ), 8.25 (d, 1H,  $J = 13.0$  Hz,  $\text{ArH}$ ). LCMS:  $m/z$  277.1 ( $[\text{M}+\text{H}]^+$ , 100%); Rt 4.3 min, purity >94% DAD (180-450 nm).

### 1-(2-Chloroethyl)indoline (**50**)

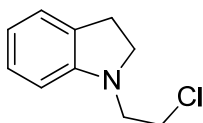

A microwave vial was charged with indoline (0.5 g, 4.19 mmol), 2-chloro-1-bromoethane (0.502 mL, 6.25 mmol), triethylamine (0.7 mL, 6.25 mmol) and acetonitrile (10 mL). The vial was irradiated with microwaves for 1 h at 80 °C. The mixture was diluted with dichloromethane and washed with water (1x10 mL). The organic layer was dried and concentrated and the residue was purified by flash column chromatography (Silica, Hex/EtOAc 95:5 to 0:1). The product was isolated as a violet solid, 400 mg (52%).

$^1\text{H-NMR}$  (500 MHz,  $\text{CDCl}_3$ )  $\delta$ : 2.93 (t, 2H,  $J = 8.4$  Hz,  $\text{CH}_2$ ), 3.35-3.43 (m, 4H,  $\text{CH}_2\text{CH}_2$ ), 3.60 (t, 2H,  $J = 6.8$  Hz,  $\text{CH}_2$ ), 6.40 (d, 1H,  $J = 7.7$  Hz,  $\text{ArH}$ ), 6.59 (dt, 1H,  $J = 7.4, 0.9$  Hz,  $\text{ArH}$ ), 6.89-7.01 (m, 2H,  $\text{ArH}$ ).  $^{13}\text{C-NMR}$  (125 MHz,  $\text{CDCl}_3$ )  $\delta$ : 28.6, 41.5, 51.4, 53.5, 106.5, 117.9, 124.6, 127.4, 129.6, 151.6. LCMS:  $m/z$  182.1 ( $[\text{M}+\text{H}]^+$ , 100%); Rt 5.3 min, purity >96% DAD (180-450 nm).

### (S)-4-(2-(Indolin-1-yl)ethyl)morpholin-2-ylmethanol (**51**)

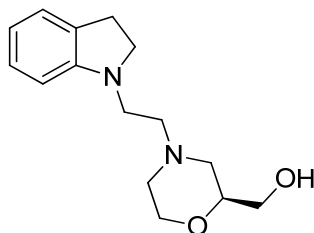

A microwave vial was charged with 1-(chloroethyl)-indoline **50** (724 mg, 4.00 mmol), hydroxymethylmorpholine **54** (562 mg, 4.80 mmol), triethylamine (2.2 mL, 16.00 mmol) and

acetonitrile (4 mL). The vial was irradiated with microwaves for 2 h at 100 °C, 40 min at 120 °C and 1 h at 110 °C. Purified by flash column chromatography (Silica, DCM/MeOH 1:0 to 8:2). Off-white solid, 347 mg (33%). <sup>1</sup>H-NMR (500 MHz, CDCl<sub>3</sub>) δ: 2.01 (bs, 1H, OH), 2.12 (t, 1H, *J* = 10.8 Hz, 1 of 1 of (CH<sub>2</sub>)<sub>2</sub>N), 2.28 (dt, 1H, *J* = 11.4, 3.3 Hz, 1 of (CH<sub>2</sub>)<sub>2</sub>N), 2.64 (dt, 2H, *J* = 7.5, 2.7 Hz, CH<sub>2</sub>N), 2.81 (t, 2H, *J* = 11.5 Hz, 2 of (CH<sub>2</sub>)<sub>2</sub>N), 2.99 (t, 2H, *J* = 8.3 Hz, CH<sub>2</sub>N), 3.26 (t, 2H, *J* = 8.3 Hz, 1 of CH<sub>2</sub>N), 3.43 (t, 2H, *J* = 8.3 Hz, ArCH<sub>2</sub>), 3.56-3.78 (m, 4H, CH<sub>2</sub>, COCH<sub>2</sub>N), 3.94-3.97 (m, 1H, CHCH<sub>2</sub>), 6.50 (d, 1H, *J* = 7.7 Hz, ArH), 6.67 (dt, 1H, *J* = 7.3, 0.8 Hz, ArH), 7.07-7.10 (m, 2H, ArH). <sup>13</sup>C-NMR (125 MHz, CDCl<sub>3</sub>) δ: 28.7, 46.9, 53.3, 53.7, 55.2, 56.32, 64.3, 66.7, 75.8, 106.7, 117.2, 124.5, 127.3, 129.8, 152.3.

**(R)-4-(2-(Indolin-1-yl)ethyl)morpholin-2-yl)methanol (52)**

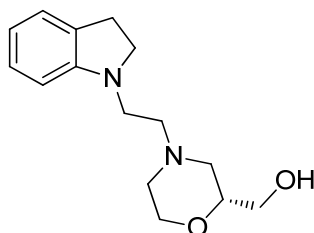

Same procedure as for compound **51** with 1-(chloroethyl)-indoline **50** (1.93 g, 10.67 mmol), hydroxymethylmorpholine **56** (1.50 g, 12.8 mmol), triethylamine (5.87 mL, 42.7 mmol) and acetonitrile (10 mL). Off-white solid, 882 mg (32%).

For NMR data see **51**.

**(R)-1-(Indolin-1-yl)-2-(2-((pyridin-2-yloxy)methyl)morpholino)ethanone (14r)**

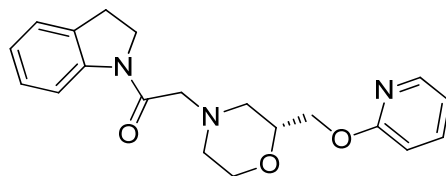

Alcohol **49** (76 mg, 0.28 mmol) and NaH (13 mg, 0.55 mmol) were placed in a microwave vial. Dry tetrahydrofuran (2 mL) was added and the mixture was stirred at room temperature for 5 min before 2-bromopyridine (52 μL, 0.55 mmol) was added. The vial was sealed and irradiated with microwaves for 1.5 h at 170 °C. After this time the solvent was removed and the crude mixture purified by flash column chromatography (Silica, Hex/EtOAc 7:3 to 0:1) to afford **14r**, 22 mg (23%).

<sup>1</sup>H-NMR (500 MHz, CDCl<sub>3</sub>) δ: 2.28 (apparent t, 1H, *J* = 10.7 Hz, 1 of (CH<sub>2</sub>)<sub>2</sub>N), 2.42 (td, 1H, *J* = 11.3, 2.9 Hz, 1 of (CH<sub>2</sub>)<sub>2</sub>N), 2.85 (d, 1H, *J* = 11.3 Hz, 1 of (CH<sub>2</sub>)<sub>2</sub>N), 3.00 (d, 1H, *J* = 10.7 Hz, 1 of (CH<sub>2</sub>)<sub>2</sub>N), 3.19 (t, 2H, *J* = 8.4 Hz, ArCH<sub>2</sub>CH<sub>2</sub>N), 3.24-3.32 (2H, COCH<sub>2</sub>), 3.80 (td, 1H, *J* = 11.3, 2.3 Hz, 1 of OCH<sub>2</sub>CH<sub>2</sub>), 3.92-3.98 (m, 1H, 1 of OCH<sub>2</sub>CH<sub>2</sub>), 3.98-4.06 (m, 1H, OCH), 4.08-4.21 (m, 2H, ArCH<sub>2</sub>CH<sub>2</sub>N), 4.31-4.38 (m, 2H, OCH<sub>2</sub>CH), 6.76-6.81 (m, 1H, ArH), 6.85 (ddd, 1H, *J* = 7.1, 5.1, 0.9 Hz, ArH), 6.99-7.05 (m, 1H, ArH), 7.16-7.22 (m, 2H, ArH), 7.54 (ddd, 1H, *J* = 8.4, 7.1, 2.0 Hz, ArH), 8.11 (ddd, 1H, *J* = 5.1, 2.0, 0.7 Hz, ArH), 8.23 (d, 1H, *J* = 8.0 Hz, ArH). <sup>13</sup>C-NMR (125 MHz, CDCl<sub>3</sub>) δ: 28.2, 47.5, 53.1, 55.4, 62.8, 66.6, 66.7, 74.1, 111.3, 116.9, 117.1, 123.9, 124.5, 127.6, 131.0, 138.6, 143.0, 146.7, 163.4, 167.2. LCMS: *m/z* 354.1803 ([M+H]<sup>+</sup>, 100%); Rt 4.8 min DAD (180-450 nm). HRMS: Found 354.1802 C<sub>20</sub>H<sub>23</sub>N<sub>3</sub>O<sub>3</sub> [M + H]<sup>+</sup> requires 354.1812. Converted to HCl salt for assay.

**(R)-4-(2-(Indolin-1-yl)ethyl)-2-((pyridin-2-yloxy)methyl)morpholine (15r)**

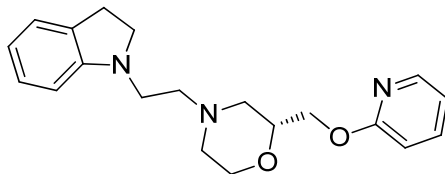

Alcohol **52** (76 mg, 0.29 mmol) and NaH (13.9 mg, 0.58 mmol) were placed in a microwave vial. Dry tetrahydrofuran (2 mL) was added and the mixture was stirred at room temperature for 5 min before 2-bromopyridine (55  $\mu$ L, 0.58 mmol) was added. The vial was sealed and irradiated with microwaves for 1.5 h at 170  $^{\circ}$ C. After this time the solvent was removed and the crude mixture purified by flash column chromatography (Silica, Hex/EtOAc 1:0 to 0:1) to afford **15r** as a slightly yellow oil, 71 mg (72%).

$^1$ H-NMR (500 MHz,  $\text{CDCl}_3$ )  $\delta$ : 2.11-2.21 (m, 1H, 1 of  $(\text{CH}_2)_2\text{N}$ ), 2.30 (td, 1H,  $J = 11.3, 3.2$  Hz, 1 of  $(\text{CH}_2)_2\text{N}$ ), 2.64 (t, 2H,  $J = 7.1$  Hz,  $\text{N}(\text{CH}_2)_2\text{N}$ ), 2.81 (m, 1H, 1 of  $(\text{CH}_2)_2\text{N}$ ), 2.92-3.00 (m, 3H,  $\text{ArCH}_2\text{CH}_2\text{N} + 1$  of  $(\text{CH}_2)_2\text{N}$ ), 3.25 (t, 2H,  $J = 7.1$  Hz,  $\text{N}(\text{CH}_2)_2\text{N}$ ), 3.37-3.45 (m, 2H,  $\text{ArCH}_2\text{CH}_2\text{N}$ ), 3.76 (td, 1H,  $J = 11.3, 2.1$  Hz, 1 of  $\text{OCH}_2\text{CH}_2$ ), 3.93-4.02 (m, 2H,  $\text{OCH}_2 + 1$  of  $\text{OCH}_2\text{CH}_2$ ), 4.33-4.38 (m, 2H,  $\text{OCH}_2\text{CH}$ ), 6.48 (d, 1H,  $J = 7.7$  Hz,  $\text{ArH}$ ), 6.65 (t, 1H,  $J = 7.3$  Hz,  $\text{ArH}$ ), 6.81 (dd, 1H,  $J = 8.3, 0.7$  Hz,  $\text{ArH}$ ), 6.84-6.89 (1H, m,  $\text{ArH}$ ), 7.03-7.11 (m, 2H,  $\text{ArH}$ ), 7.53-7.61 (m, 1H,  $\text{ArH}$ ), 8.09-8.19 (m, 1H,  $\text{ArH}$ ).  $^{13}\text{C}$ -NMR (125 MHz,  $\text{CDCl}_3$ )  $\delta$ : 28.7, 46.9, 53.4, 53.7, 55.7, 56.3, 66.8, 66.9, 74.1, 106.8, 111.4, 117.0, 117.6, 124.5, 127.3, 129.9, 138.6, 146.7, 152.3, 163.5. LCMS:  $m/z$  340.2004 ( $[\text{M}+\text{H}]^+$ , 100%); Rt 5.3 min, purity >93% DAD (180-450 nm). HRMS: Found 340.2004  $\text{C}_{20}\text{H}_{25}\text{N}_3\text{O}_2$   $[\text{M} + \text{H}]^+$  requires 340.2020. Compound was re-purified to assay (39.4 mg, purity >99%). Converted to HCl salt for assay.

**(R)-1-(Indolin-1-yl)-2-(2-(((4-methylpyridin-2-yl)oxy)methyl)morpholino)ethanone (16r)**

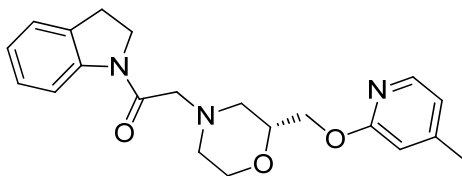

Same procedure as **14r** with 2-bromo-4-methylpyridine (92  $\mu$ L, 0.83 mmol). The crude mixture was purified by flash column chromatography (Silica, Hex/EtOAc 7:3 to 0:1) to afford **16r**, 29 mg (29%).

$^1$ H-NMR (500 MHz,  $\text{CDCl}_3$ )  $\delta$ : 2.23-2.30 (m, 4H, 1 of  $(\text{CH}_2)_2\text{N} + \text{Me}$ ), 2.40 (td, 1H,  $J = 11.1, 2.8$  Hz, 1 of  $(\text{CH}_2)_2\text{N}$ ), 2.85 (d, 1H,  $J = 11.1$  Hz, 1 of  $(\text{CH}_2)_2\text{N}$ ), 2.99 (d, 1H,  $J = 11.0$  Hz, 1 of  $(\text{CH}_2)_2\text{N}$ ), 3.18 (t, 2H,  $J = 8.4$  Hz,  $\text{ArCH}_2\text{CH}_2\text{N}$ ), 3.23-3.31 (m, 2H,  $\text{COCH}_2$ ), 3.78 (td, 1H,  $J = 11.3, 2.2$  Hz, 1 of  $\text{OCH}_2\text{CH}_2$ ), 3.91-3.97 (m, 1H, 1 of  $\text{OCH}_2\text{CH}_2$ ), 3.97-4.04 (m, 1H,  $\text{OCH}_2$ ), 4.08-4.20 (m, 2H,  $\text{ArCH}_2\text{CH}_2\text{N}$ ), 4.28-4.36 (m, 2H,  $\text{OCH}_2\text{CH}$ ), 6.60 (s, 1H,  $\text{ArH}$ ), 6.65-6.69 (m, 1H,  $\text{ArH}$ ), 6.98-7.04 (m, 1H,  $\text{ArH}$ ), 7.15-7.22 (m, 2H,  $\text{ArH}$ ), 7.96 (d, 1H,  $J = 5.2$  Hz,  $\text{ArH}$ ), 8.22 (d, 1H,  $J = 8.0$  Hz,  $\text{ArH}$ ).  $^{13}\text{C}$ -NMR (125 MHz,  $\text{CDCl}_3$ )  $\delta$ : 20.9, 28.2, 47.4, 53.1, 55.4, 62.7, 66.5, 66.7, 74.1, 111.3, 117.1, 118.5, 123.9, 124.5, 127.5, 131.0, 143.0, 146.2, 149.9, 163.8, 167.2. LCMS:  $m/z$  368.1964 ( $[\text{M}+\text{H}]^+$ , 100%); Rt 4.9 min DAD (180-450 nm). HRMS: Found 368.1964  $\text{C}_{21}\text{H}_{25}\text{N}_3\text{O}_3$   $[\text{M} + \text{H}]^+$  requires 368.1969. Converted to HCl salt for assay.

**(R)-4-(2-(Indolin-1-yl)ethyl)-2-(((4-methylpyridin-2-yl)oxy)methyl)morpholine (17r)**

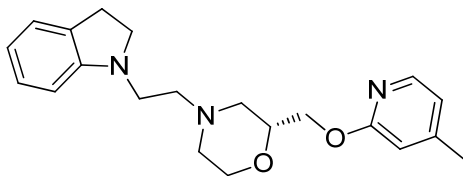

Same procedure as **15r** with 2-bromo-4-methylpyridine (96  $\mu$ L, 0.86 mmol). The crude mixture was purified by flash column chromatography (Silica, Hex/EtOAc 1:0 to 0:1) to afford **17r**, 82 mg (80%).

$^1\text{H-NMR}$  (500 MHz,  $\text{CDCl}_3$ )  $\delta$ : 2.10-2.18 (m, 1H, 1 of  $(\text{CH}_2)_2\text{N}$ ), 2.35-2.33 (m, 4H, Me + 1 of  $(\text{CH}_2)_2\text{N}$ ), 2.63 (t, 2H,  $J = 7.1$  Hz,  $\text{N}(\text{CH}_2)_2\text{N}$ ), 2.77-2.83 (m, 1H, 1 of  $(\text{CH}_2)_2\text{N}$ ), 2.92-2.99 (m, 3H,  $\text{ArCH}_2\text{CH}_2\text{N}$  + 1 of  $(\text{CH}_2)_2\text{N}$ ), 3.22-3.28 (m, 2H,  $\text{N}(\text{CH}_2)_2\text{N}$ ), 3.35-3.45 (m, 2H,  $\text{ArCH}_2\text{CH}_2\text{N}$ ), 3.75 (td, 1H,  $J = 11.4, 2.4$  Hz, 1 of  $\text{OCH}_2\text{CH}_2$ ), 3.93-4.00 (m, 2H,  $\text{OCH}$  + 1 of  $\text{OCH}_2\text{CH}_2$ ), 4.29-4.37 (m, 2H,  $\text{OCH}_2\text{CH}$ ), 6.48 (d, 1H,  $J = 7.7$  Hz,  $\text{ArH}$ ), 6.62-6.67 (m, 2H,  $\text{ArH}$ ), 6.68-6.71 (m, 1H,  $\text{ArH}$ ), 7.03-7.09 (m, 2H,  $\text{ArH}$ ), 7.99 (d, 1H,  $J = 5.2$  Hz,  $\text{ArH}$ ).  $^{13}\text{C-NMR}$  (125 MHz,  $\text{CDCl}_3$ )  $\delta$ : 20.9, 28.6, 46.9, 53.4, 53.7, 55.7, 56.3, 66.7, 68.8, 74.1, 106.8, 111.4, 117.6, 118.6, 124.4, 127.3, 129.9, 146.2, 150.0, 152.3, 163.8. LCMS:  $m/z$  354.2173 ( $[\text{M}+\text{H}]^+$ , 100%); Rt 4.3 min, purity >96% DAD (180-450 nm). HRMS: Found 354.2173  $\text{C}_{21}\text{H}_{27}\text{N}_3\text{O}_2$   $[\text{M} + \text{H}]^+$  requires 354.2176. Converted to HCl salt for assay.

**(S)-1-(Indolin-1-yl)-2-(2-(phenoxy)methyl)morpholino)ethanone (18s)**

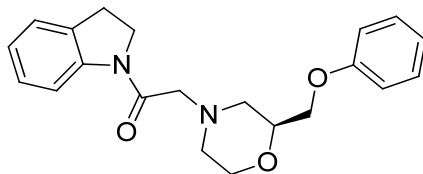

Using the same procedure as described<sup>4</sup>, with compound **48** (55 mg, 0.2 mmol), phenol (28 mg, 0.3 mmol), triphenylphosphine (78 mg, 0.3 mmol), DEAD (0.05 ml, 0.3 mmol), tetrahydrofuran (1 mL). The crude residue was purified twice by flash column chromatography to afford the title compound as a colourless oil, 44 mg (62%). Converted to HCl salt for assay.

$^1\text{H-NMR}$  (500 MHz,  $\text{CD}_3\text{OD}$ )  $\delta$ : 3.29 (t, 2H,  $J = 8.2$  Hz,  $\text{ArCH}_2$ ), 3.37-3.42 (m, 2H,  $\text{CH}_2\text{N}$ ), 3.70 (bs, 1H, 1 of  $(\text{CH}_2)_2\text{N}$ ), 3.85 (bs, 1H, 1 of  $(\text{CH}_2)_2\text{N}$ ), 4.05-4.24 (m, 6H,  $\text{ArCH}_2\text{CH}_2$  +  $\text{CH}_2\text{N}$  +  $\text{CH}_2\text{O}$ ), 4.30-4.44 (m, 3H,  $\text{CHCH}_2$  +  $\text{CH}_2\text{O}$ ), 6.97-6.99 (m, 3H,  $\text{ArH}$ ), 7.12 (dt, 1H,  $J = 7.4, 0.7$  Hz,  $\text{ArH}$ ), 7.22 (d, 1H,  $J = 7.5$  Hz,  $\text{ArH}$ ), 7.28-7.32 (m, 3H,  $\text{ArH}$ ), 8.17 (d, 1H,  $J = 8.2$  Hz,  $\text{ArH}$ ).  $^{13}\text{C-NMR}$  (125 MHz,  $\text{CDCl}_3$ )  $\delta$ : 28.7, 46.9, 53.4, 53.7, 56.0, 56.3, 66.9, 69.1, 74.1, 76.8, 106.8, 114.6, 117.6, 121.0, 124.5, 127.3, 129.5, 129.9, 152.3, 158.7.

**(S)-4-(2-(Indolin-1-yl)ethyl)-2-(phenoxy)methyl)morpholine (19s)**

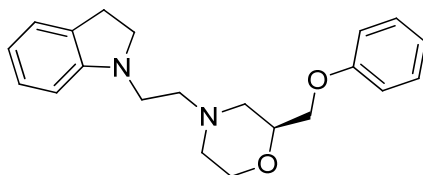

Same procedure as compound **18s** with **51** (52 mg, 0.2 mmol), phenol (28 mg, 0.3 mmol), triphenylphosphine (78 mg, 0.3 mmol), DEAD (0.05 ml, 0.3 mmol), tetrahydrofuran (1 mL). The crude residue was purified twice by flash column chromatography to afford the title compound as a colourless oil, 28 mg (41%).

<sup>1</sup>H-NMR (500 MHz, CDCl<sub>3</sub>) δ: 2.06-2.10 (m, 1H, 1 of (CH<sub>2</sub>)<sub>2</sub>N), 2.34 (dt, 1H, *J* = 11.3, 3.3 Hz, 1 of (CH<sub>2</sub>)<sub>2</sub>N), 2.68 (t, 2H, *J* = 6.9 Hz, 2 of N(CH<sub>2</sub>)<sub>2</sub>N), 2.83 (dd, 1H, *J* = 13.1, 1.9 Hz, 1 of (CH<sub>2</sub>)<sub>2</sub>N), 2.98-3.03 (m, 3H, ArCH<sub>2</sub> + 1 of (CH<sub>2</sub>)<sub>2</sub>N), 3.28 (t, 2H, *J* = 7.4 Hz, 2 of N(CH<sub>2</sub>)<sub>2</sub>N), 3.43 (dt, 2H, *J* = 8.3, 1.8 Hz, ArCH<sub>2</sub>CH<sub>2</sub>N), 3.79 (dt, 1H, *J* = 11.3, 2.5 Hz, 1 of OCH<sub>2</sub>CH<sub>2</sub>), 3.95-4.01 (m, 3H, OCH + 1 of OCH<sub>2</sub>CH<sub>2</sub>), 4.05-4.09 (m, 1H, 1 of OCH<sub>2</sub>CH), 6.52 (d, 1H, *J* = 7.6 Hz, ArH), 6.67 (dt, 1H, *J* = 7.4, 0.9 Hz, ArH), 6.94-7.00 (m, 3H, ArH), 7.07-7.10 (m, 2H, ArH), 7.28-7.32 (m, 2H, ArH). <sup>13</sup>C-NMR (125 MHz, CDCl<sub>3</sub>) δ: 28.7, 46.9, 53.4, 53.7, 55.9, 56.0, 56.3, 66.9, 69.4, 73.9, 76.8, 106.8, 113.1, 115.1, 117.6, 121.2, 124.5, 127.4, 129.9, 130.2, 134.9, 152.3, 159.4. HRMS: Found 339.2072 C<sub>21</sub>H<sub>27</sub>N<sub>2</sub>O<sub>2</sub> [M + H]<sup>+</sup> requires 339.2067. Converted to HCl salt for assay.

**(R)-1-(Indolin-1-yl)-2-(2-((pyridin-3-yloxy)methyl)morpholino)ethanone (20r)**

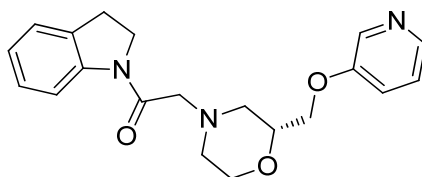

Same procedure as compound **18s** with alcohol **49** (90 mg, 0.326 mmol), 3-hydroxypyridine (46 mg, 0.49 mmol), triphenylphosphine (128 mg, 0.49 mmol), DIAD (0.10 mL, 0.49 mmol), tetrahydrofuran (1 mL). The crude residue was purified twice by flash column chromatography (Silica, DCM/MeOH 1:0 to 8:2) to afford the title compound as a colourless oil, 6 mg (5%).

<sup>1</sup>H-NMR (500 MHz, CDCl<sub>3</sub>) δ: 2.35 (t, 1H, *J* = 10.5 Hz, 1 of 1 of (CH<sub>2</sub>)<sub>2</sub>N), 2.48 (dt, 1H, *J* = 12, 3.8 Hz, 1 of (CH<sub>2</sub>)<sub>2</sub>N), 2.89 (d, 1H, *J* = 12 Hz, 1 of (CH<sub>2</sub>)<sub>2</sub>N), 3.08 (d, 1H, *J* = 11 Hz, 1 of (CH<sub>2</sub>)<sub>2</sub>N), 3.24 (t, 2H, *J* = 8.5 Hz, 1 of ArCH<sub>2</sub>), 3.31-3.33 (m, 2H, COCH<sub>2</sub>N), 3.85 (dt, 1H, *J* = 11.2, 2.4 Hz, 1 of CHCH<sub>2</sub>OAr), 3.97-4.14 (m, 4H, CH<sub>2</sub>OCHCH<sub>2</sub> + 1 of CH<sub>2</sub>OAr), 4.18-4.21 (m, 2H, ArCH<sub>2</sub>CH<sub>2</sub>), 7.06 (dt, 1H, *J* = 7.4, 1.0 Hz, ArH), 7.21-7.24 (m, 4H, ArH), 8.26 (d, 1H, *J* = 7.9 Hz, ArH), 8.36 (bs, 1H, ArH). <sup>13</sup>C-NMR (125 MHz, CDCl<sub>3</sub>) δ: 28.3, 47.5, 53.1, 55.3, 62.6, 66.8, 69.4, 73.9, 117.1, 121.3, 123.9, 124.6, 127.6, 138.1, 142.5, 167.1. LCMS: *m/z* 556.2 ([M+H]<sup>+</sup>, 100%); Rt 5.0 min, purity >99% DAD (180-450 nm). Converted to HCl salt for assay.

**(R)-4-(2-(Indolin-1-yl)ethyl)-2-((pyridin-3-yloxy)methyl)morpholine (21r)**

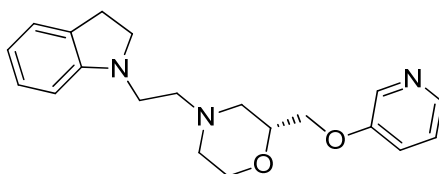

Same procedure as **18s** with alcohol **52** (80 mg, 0.30 mmol) triphenylphosphine (120 mg, 0.46 mmol), DIAD (90 μL, 0.46 mmol) and 3-hydroxypyridine (44 mg, 0.46 mmol). Purified by flash column chromatography (Silica, DCM/MeOH 1:0 to 94:6). Colourless oil, 61 mg (59%).

<sup>1</sup>H-NMR (500 MHz, CDCl<sub>3</sub>) δ: 2.14-2.21 (m, 1H, 1 of (CH<sub>2</sub>)<sub>2</sub>N), 2.31 (td, 1H, *J* = 11.3, 3.3 Hz, 1 of (CH<sub>2</sub>)<sub>2</sub>N), 2.66 (t, 2H, *J* = 7.1 Hz, N(CH<sub>2</sub>)<sub>2</sub>N), 2.79-2.83 (m, 1H, 1 of (CH<sub>2</sub>)<sub>2</sub>N), 2.93-3.01 (m, 3H,

ArCH<sub>2</sub>CH<sub>2</sub>N + 1 of (CH<sub>2</sub>)<sub>2</sub>N), 3.26 (t, 2H, *J* = 7.1 Hz, N(CH<sub>2</sub>)<sub>2</sub>N), 3.37-3.45 (m, 2H, ArCH<sub>2</sub>CH<sub>2</sub>N), 3.77 (td, 1H, *J* = 11.3, 2.5 Hz, 1 of OCH<sub>2</sub>CH<sub>2</sub>), 3.93-4.02 (m, 3H, OCH + 1 of OCH<sub>2</sub>CH<sub>2</sub> + 1 of OCH<sub>2</sub>CH), 4.04-4.10 (m, 1H, 1 of OCH<sub>2</sub>CH), 6.48 (d, 1H, *J* = 7.7 Hz, ArH), 6.65 (td, 1H, *J* = 7.5, 0.9 Hz, ArH), 7.01-7.12 (m, 2H, ArH), 7.20-7.23 (m, 2H, ArH), 8.21-8.24 (m, 1H, ArH), 8.32-8.35 (m, 1H, ArH). <sup>13</sup>C-NMR (125 MHz, CDCl<sub>3</sub>) δ: 28.7, 47.0, 53.4, 53.7, 55.7, 56.3, 66.9, 69.4, 73.9, 106.7, 117.6, 121.3, 123.8, 124.5, 127.3, 129.9, 138.0, 142.5, 152.3, 154.9. LCMS: *m/z* 340.2017 ([M+H]<sup>+</sup>, 100%); Rt 4.9 min, purity >99% DAD (180-450 nm). HRMS: Found 340.2017 C<sub>20</sub>H<sub>25</sub>N<sub>3</sub>O<sub>2</sub> [M + H]<sup>+</sup> requires 340.2020. Converted to HCl salt for assay.

**(S)-1-(Indolin-1-yl)-2-(2-((pyridin-3-yloxy)methyl)morpholino)ethanone (20s)**

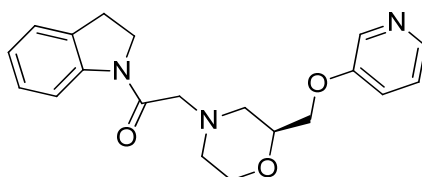

Same procedure as compound **18s** with alcohol **48** (55 mg, 0.2 mmol), 3-hydroxypyridine (28 mg, 0.3 mmol), triphenylphosphine (78 mg, 0.3 mmol), DEAD (0.05 mL, 0.3 mmol), tetrahydrofuran (1 mL). The crude residue was purified twice by flash column chromatography (Silica, DCM/MeOH 1:0 to 8:2) to afford the title compound as a colourless oil, 53 mg (74%). Converted to HCl salt for assay.

<sup>1</sup>H-NMR (500 MHz, CD<sub>3</sub>OD) δ: 3.31 (m, 2H, 1 of ArCH<sub>2</sub>), 3.47-3.41 (m, 2H, NCH<sub>2</sub>), 3.71 (bs, 1H, 1 of CH<sub>2</sub>N), 3.90 (bs, 1H, 1 of CH<sub>2</sub>N), 4.07-4.25 (m, 4H, ArCH<sub>2</sub>CH<sub>2</sub> + CH<sub>2</sub>N), 4.40-4.50 (m, 5H, CH<sub>2</sub>OCHCH<sub>2</sub>), 7.12 (t, 1H, *J* = 7.5 Hz, ArH), 7.22 (t, 1H, *J* = 8.3 Hz, ArH), 7.31 (d, 1H, 7.6 Hz, ArH), 7.99-8.01 (m, 1H, ArH), 8.17 (d, 1H, *J* = 8.3 Hz, ArH), 8.25 (d, 1H, *J* = 7.90 Hz, ArH), 8.49 (d, 1H, *J* = 5.5 Hz, ArH), 8.67 (s, 1H, ArH).

**(S)-4-(2-(Indolin-1-yl)ethyl)-2-((pyridin-3-yloxy)methyl)morpholine (21s)**

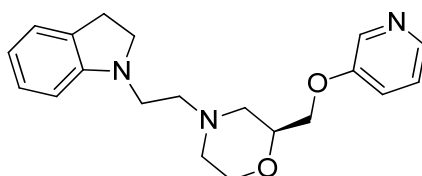

Same procedure as compound **18s** with alcohol **52** (52 mg, 0.2 mmol), 3-hydroxypyridine (28 mg, 0.3 mmol), triphenylphosphine (78 mg, 0.3 mmol), DEAD (0.05 ml, 0.3 mmol), tetrahydrofuran (1 mL). The crude residue was purified twice by flash column chromatography (Silica, DCM/MeOH 1:0 to 8:2) to afford compound **21s** as a colourless oil, 28 mg (41%).

<sup>1</sup>H-NMR (500 MHz, CDCl<sub>3</sub>) δ: 2.18-2.22 (m, 1H, 1 of (CH<sub>2</sub>)<sub>2</sub>N), 2.34 (dt, 1H, *J* = 11.3, 3.3 Hz, 1 of (CH<sub>2</sub>)<sub>2</sub>N), 2.68 (t, 2H, *J* = 6.9 Hz, N(CH<sub>2</sub>)<sub>2</sub>N), 2.83 (dd, 1H, *J* = 11.4, 1.9 Hz, 1 of (CH<sub>2</sub>)<sub>2</sub>N), 2.99-3.00 (m, 3H, ArCH<sub>2</sub> + 1 of (CH<sub>2</sub>)<sub>2</sub>N), 3.28 (t, 2H, *J* = 7.2 Hz, N(CH<sub>2</sub>)<sub>2</sub>N), 3.43 (dt, 2H, *J* = 8.3, 1.3 Hz, ArCH<sub>2</sub>CH<sub>2</sub>N), 3.78 (dt, 1H, *J* = 11.3, 2.5 Hz, 1 of OCH<sub>2</sub>CH<sub>2</sub>), 3.96-4.02 (m, 3H, OCH + 1 of OCH<sub>2</sub>CH<sub>2</sub> + 1 of OCHCH<sub>2</sub>), 4.08-4.11 (m, 1H, 1 of OCH<sub>2</sub>CH), 6.51 (d, 1H, *J* = 7.7 Hz, ArH), 6.67 (dt, 1H, *J* = 7.4, 0.9 Hz, ArH), 7.07-x7.10 (m, 2H, ArH), 7.23-7.24 (m, 2H, ArH), 8.25-8.26 (m, 1H, ArH), 8.37 (bs, 1H, ArH). <sup>13</sup>C-NMR (125 MHz, CDCl<sub>3</sub>) δ: 28.7, 46.9, 53.4, 53.7, 55.7, 56.3, 66.9, 69.5, 73.9, 76.81, 106.7, 117.6, 121.3, 123.8, 124.5, 127.3, 129.8, 138.1, 142.5, 152.3, 154.9. HRMS: Found 340.2019 C<sub>20</sub>H<sub>26</sub>N<sub>3</sub>O<sub>2</sub> [M + H]<sup>+</sup> requires 340.2020. Converted to HCl salt for assay.

**(R)-2-(2-((3-chlorophenoxy)methyl)morpholino)-1-(indolin-1-yl)ethanone (22r)**

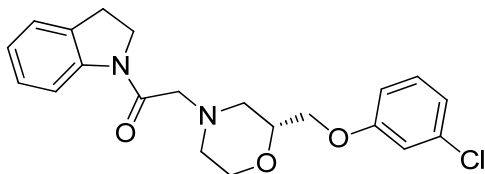

Same procedure as compound **18s** with alcohol **49** (90 mg, 0.326 mmol), 3-chlorophenol (63 mg, 0.49 mmol), triphenylphosphine (128 mg, 0.49 mmol), DIAD (0.10 mL, 0.49 mmol), tetrahydrofuran (1 mL). The crude residue was purified twice by flash column chromatography (Silica, DCM/MeOH 1:0 to 8:2) to afford compound **22r** as a colourless oil, 42 mg (33%).

<sup>1</sup>H-NMR (500 MHz, CDCl<sub>3</sub>) δ: 2.22 (t, 1H, *J* = 11.2 Hz, 1 of 1 of (CH<sub>2</sub>)<sub>2</sub>N), 2.37 (dt, 1H, *J* = 11.2, 3.7 Hz, 1 of (CH<sub>2</sub>)<sub>2</sub>N), 2.78 (d, 1H, *J* = 14 Hz, 1 of (CH<sub>2</sub>)<sub>2</sub>N), 2.95 (d, 1H, *J* = 14 Hz, 1 of (CH<sub>2</sub>)<sub>2</sub>N), 3.13 (t, 2H, *J* = 9.7 Hz, 1 of ArCH<sub>2</sub>), 3.23 (s, 2H, COCH<sub>2</sub>N), 3.73 (dt, 1H, *J* = 11.6, 2.0 Hz, 1 of CHCH<sub>2</sub>OAr), 3.83-3.95 (m, 4H, CH<sub>2</sub>OCHCH<sub>2</sub> + 1 of CH<sub>2</sub>OAr), 4.10 (t, 2H, *J* = 8.7 Hz, ArCH<sub>2</sub>CH<sub>2</sub>), 6.71-6.73 (m, 1H, ArH), 6.84-6.87 (m, 2H, ArH), 6.95 (t, *J* = 7.3 Hz, ArH), 7.09-7.15 (m, 3H, ArH), 8.16 (d, 1H, *J* = 9.8 Hz, ArH). LCMS: *m/z* 387.14 ([M+H]<sup>+</sup>, 100%); Rt 5.5 min, purity >99% DAD (180-450 nm). Converted to HCl salt for assay.

**(R)-2-((3-Chlorophenoxy)methyl)-4-(2-(indolin-1-yl)ethyl)morpholine (23r)**

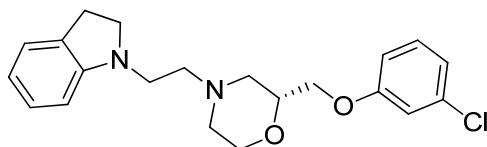

Same procedure as compound **18s** with alcohol **52** (80 mg, 0.30 mmol), 3-chlorophenol (59 mg, 0.46 mmol), triphenylphosphine (120 mg, 0.46 mmol), DIAD (90 μL, 0.46 mmol) and tetrahydrofuran (1.5 mL). The crude mixture was purified twice by flash column chromatography (Silica, DCM/MeOH 1:0 to 96:4 then Hex/EtOAc 1:0 to 0:1) to afford **23r**, 5 mg (4%).

<sup>1</sup>H-NMR (500 MHz, CDCl<sub>3</sub>) δ: 2.12-2.20 (m, 1H, 1 of (CH<sub>2</sub>)<sub>2</sub>N), 2.31 (td, 1H, *J* = 11.3, 3.3 Hz, 1 of (CH<sub>2</sub>)<sub>2</sub>N), 2.65 (t, 2H, *J* = 7.1 Hz, N(CH<sub>2</sub>)<sub>2</sub>N), 2.79-2.85 (m, 1H, 1 of (CH<sub>2</sub>)<sub>2</sub>N), 2.94-3.01 (m, 3H, ArCH<sub>2</sub>CH<sub>2</sub>N + 1 of (CH<sub>2</sub>)<sub>2</sub>N), 3.26 (t, 2H, *J* = 7.1 Hz, N(CH<sub>2</sub>)<sub>2</sub>N), 3.37-3.46 (m, 2H, ArCH<sub>2</sub>CH<sub>2</sub>N), 3.76 (td, 1H, *J* = 11.3, 2.4 Hz, 1 of OCH<sub>2</sub>CH<sub>2</sub>), 3.88-4.05 (m, 4H, OCH + OCH<sub>2</sub>CH + 1 of OCH<sub>2</sub>CH<sub>2</sub>), 6.49 (d, 1H, *J* = 7.7 Hz, ArH), 6.63-6.68 (m, 1H, ArH), 6.79-6.83 (m, 1H, ArH), 6.90-6.96 (m, 2H, ArH), 7.04-7.10 (m, 2H, ArH), 7.19 (t, 1H, *J* = 8.1 Hz, ArH). <sup>13</sup>C-NMR (125 MHz, CDCl<sub>3</sub>) δ: 28.7, 46.9, 53.4, 53.7, 55.8, 56.3, 66.9, 69.4, 73.9, 106.8, 113.1, 115.0, 117.6, 121.2, 124.5, 127.3, 129.9, 130.2, 134.8, 152.3, 159.4. LCMS: *m/z* 373.17 ([M+H]<sup>+</sup>, 100%); Rt 5.8 min, purity >95% DAD (180-450 nm). HRMS: Found 373.1665 C<sub>21</sub>C<sub>25</sub>ClN<sub>2</sub>O<sub>2</sub> requires 373.1677. Converted to HCl salt for assay.

**(S)-2-(2-((3-Chlorophenoxy)methyl)morpholino)-1-(indolin-1-yl)ethanone (22s)**

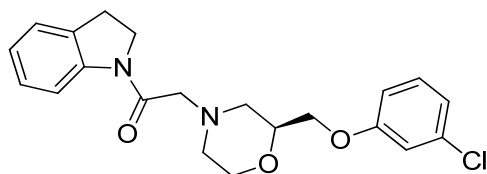

Same procedure as compound **18s** with alcohol **48** (55 mg, 0.2 mmol), 3-chlorophenol (39 mg, 0.3 mmol), triphenylphosphine (78 mg, 0.3 mmol), DEAD (0.05 ml, 0.3 mmol), tetrahydrofuran (1 mL). The crude residue was purified twice by flash column chromatography (Silica, DCM/MeOH 1:0 to 8:2) to afford compound **22s** as a colourless oil, 51 mg (65%). Converted to HCl salt for assay. <sup>1</sup>H-NMR (500 MHz, CD<sub>3</sub>OD) δ: 3.30 (t, 2H, *J* = 8.3 Hz, ArCH<sub>2</sub>), 3.36-3.38 (m, 2H, CH<sub>2</sub>N), 3.69 (bs, 1H, 1 of CH<sub>2</sub>N), 3.82 (bs, 1H, 1 of CH<sub>2</sub>N), 4.04-4.23 (m, 6H, ArCH<sub>2</sub>CH<sub>2</sub> + CH<sub>2</sub>N, + CH<sub>2</sub>O), 4.30 (bs, 1H, 1 of CH<sub>2</sub>O), 4.44 (s, 2H, 1 of CH<sub>2</sub>O + OCH), 6.93 (d, 1H, *J* = 8.1 Hz, ArH), 6.99-7.02 (m, 2H, ArH), 7.12 (t, 1H, *J* = 7.4 Hz, ArH), 7.22 (t, 1H, *J* = 7. Hz, ArH), 7.27-7.30 (m, 2H, ArH), 8.17 (d, 1H, *J* = 8.2 Hz, ArH).

**(S)-2-((3-chlorophenoxy)methyl)-4-(2-(indolin-1-yl)ethyl)morpholine (23s)**

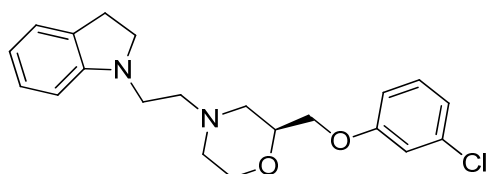

Same procedure as compound **18s** with **51** (52 mg, 0.2 mmol), 3-chlorophenol (39 mg, 0.3 mmol), triphenylphosphine (78 mg, 0.3 mmol), DEAD (0.05 ml, 0.3 mmol), tetrahydrofuran (1 mL). The crude residue was purified twice by flash column chromatography (Silica, DCM/MeOH 1:0 to 8:2) to afford compound **23s** as a colourless oil, 30 mg (40%).

<sup>1</sup>H NMR (500 MHz, CDCl<sub>3</sub>) δ 2.19 (dd, 1H, *J* = 10.8, 10.1 Hz, 1 of (CH<sub>2</sub>)<sub>2</sub>N), 2.34 (td, 1H, *J* = 11.3, 3.3 Hz, 1 of (CH<sub>2</sub>)<sub>2</sub>N), 2.65 (t, 2H, *J* = 6.9 Hz, N(CH<sub>2</sub>)<sub>2</sub>N), 2.83 (dt, 1H, *J* = 11.0, 5.5 Hz, 1 of (CH<sub>2</sub>)<sub>2</sub>N), 2.98-3.07 (m, 3H, ArCH<sub>2</sub> + 1 of (CH<sub>2</sub>)<sub>2</sub>N), 3.28 (t, 2H, *J* = 7.4 Hz, N(CH<sub>2</sub>)<sub>2</sub>N), 3.45 (dt, 2H, *J* = 8.3, 1.5 Hz, ArCH<sub>2</sub>CH<sub>2</sub>), 3.79 (td, 1H, *J* = 11.3, 2.5 Hz, 1 of OCH<sub>2</sub>CH<sub>2</sub>), 4.08 – 3.91 (m, 4H, OCHCH<sub>2</sub> + 1 of CH<sub>2</sub>O), 6.52 (d, 1H, *J* = 7.7 Hz, ArH), 6.68 (dt, 1H, *J* = 7.4, 9 Hz, ArH), 6.84 (ddd, 1H, *J* = 8.4, 2.4, 0.9 Hz, ArH), 6.93-7.00 (m, 2H, ArH), 7.10 (t, 2H, *J* = 7.6 Hz, ArH), 7.22 (dt, 1H, *J* = 8.2, 0.3 Hz, ArH). <sup>13</sup>C NMR (125 MHz, CDCl<sub>3</sub>) δ 26.7, 46.9, 53.4, 53.7, 55.6, 56.3, 66.9, 69.4, 73.9, 106.7, 113.3, 115.1, 117.6, 121.2, 124.5, 127.3, 129.8, 130.2, 134.9, 152.3, 159.4. HRMS: Found 373.1673 C<sub>21</sub>H<sub>26</sub>ClN<sub>2</sub>O<sub>2</sub> [M + H]<sup>+</sup> requires 373.1677. Converted to HCl salt for assay.

**(S)-1-(Indolin-1-yl)-2-(2-((3-methoxyphenoxy)methyl)morpholino)ethanone (24s)**

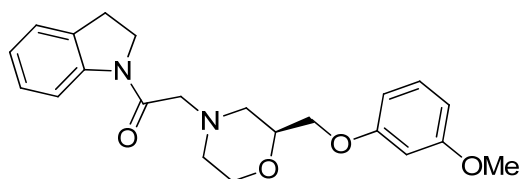

Same procedure as compound **18s** with alcohol **48** (55 mg, 0.2 mmol), 3-methoxyphenol (0.032 mL, 0.3 mmol), triphenylphosphine (78 mg, 0.3 mmol), DEAD (0.05 mL, 0.3 mmol) and tetrahydrofuran (1



mL). The crude residue was purified twice by flash column chromatography (Silica, DCM/MeOH 1:0 to 8:2) to afford compound **24s** as a colourless oil, 60 mg (78%). Converted to HCl salt for assay.

<sup>1</sup>H-NMR (500 MHz, CD<sub>3</sub>OD) δ: 3.31 (t, 2H, *J* = 8.1 Hz, ArCH<sub>2</sub>), 3.36-3.38 (bs, 2H, CH<sub>2</sub>N), 3.73 (bs, 1H, 1 of (CH<sub>2</sub>)<sub>2</sub>N), 3.78 (s, 3H, OCH<sub>3</sub>), 3.86 (bs, 1H, 1 of (CH<sub>2</sub>)<sub>2</sub>N), 4.04-4.25 (m, 6H, ArCH<sub>2</sub>CH<sub>2</sub> + CH<sub>2</sub>N + CH<sub>2</sub>O), 4.29 (bs, 1H, 1 of OCH<sub>2</sub>), 4.45 (s, 2H, OCH + 1 of OCH<sub>2</sub>), 6.54-6.58 (m, 3H, ArH), 7.12 (t, 1H, *J* = 7.6 Hz, ArH), 7.18-7.24 (m, 2H, ArH), 7.30 (d, 1H, *J* = 7.9 Hz, ArH), 8.17 (d, 1H, *J* = 8.0 Hz, ArH).

#### (S)-4-(2-(Indolin-1-yl)ethyl)-2-((3-methoxyphenoxy)methyl)morpholine (25s)

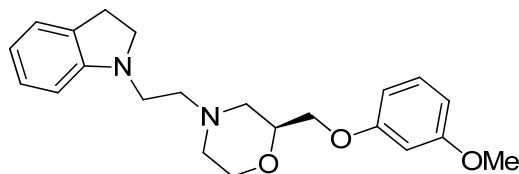

Same procedure as compound **18s** with alcohol **51** (52 mg, 0.2 mmol), 3-methoxyphenol (0.032 mL, 0.3 mmol), triphenylphosphine (78 mg, 0.3 mmol), DEAD (0.05 mL, 0.3 mmol) and tetrahydrofuran (1 mL). The crude residue was purified twice by flash column chromatography (Silica, DCM/MeOH 1:0 to 8:2) to afford compound **25s** as a colourless oil, 46 mg (62%).

<sup>1</sup>H NMR (500 MHz, CDCl<sub>3</sub>) δ 2.24–2.13 (m, 1H, 1 of (CH<sub>2</sub>)<sub>2</sub>N), 2.34 (td, 1H, *J* = 11.3, 3.3 Hz, 1 of (CH<sub>2</sub>)<sub>2</sub>N), 2.67 (t, 2H, *J* = 7.1 Hz, N(CH<sub>2</sub>)<sub>2</sub>N), 2.84 (dd, 1H, *J* = 11.4, 1.6 Hz, 1 of (CH<sub>2</sub>)<sub>2</sub>N), 2.98-3.02 (m, 3H, ArCH<sub>2</sub> + 1 of (CH<sub>2</sub>)<sub>2</sub>N), 3.28 (t, 2H, *J* = 7.2 Hz, N(CH<sub>2</sub>)<sub>2</sub>N), 3.44 (dt, 2H, *J* = 8.2, 2.0, ArCH<sub>2</sub>CH<sub>2</sub>), 3.78 (dt, 1H, *J* = 11.3, 2.5 Hz, 1 of OCH<sub>2</sub>CH<sub>2</sub>), 3.81 (s, 3H, OCH<sub>3</sub>), 4.08 – 3.93 (m, 4H, OCH<sub>2</sub>CH<sub>2</sub> + 1 of CH<sub>2</sub>O), 6.57 – 6.49 (m, 4H, ArH), 6.68 (t, 1H, *J* = 7.1 Hz, ArH), 7.07 -7.11 (m, 2H, ArH), 7.20 (dt, 1H *J* = 8.1, 0.5 Hz, ArH). <sup>13</sup>C NMR (125 MHz, CDCl<sub>3</sub>) δ 28.67, 46.9, 53.4, 53.7, 55.3, 56.0, 56.3, 66.9, 69.2, 74.0, 101.1, 106.6, 106.7, 106.8, 117.6, 124.5, 127.3, 129.9, 152.3, 159.9, 160.8. HRMS: Found 369.2162 C<sub>22</sub>H<sub>29</sub>N<sub>2</sub>O<sub>3</sub> [M + H]<sup>+</sup> requires 369.2173. Converted to HCl salt for assay.

#### (R)-4-(2-(Indolin-1-yl)ethyl)-2-((3-methoxyphenoxy)methyl)morpholine (25r)

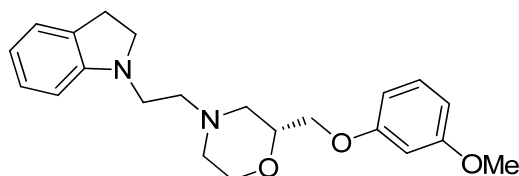

Same procedure as **18s** with alcohol **52** (80 mg, 0.30 mmol), 3-methoxyphenol (50 μL, 0.46 mmol), triphenylphosphine (120 mg, 0.46 mmol), DIAD (90 μL, 0.46 mmol) and tetrahydrofuran (1.5 mL). The crude mixture was purified twice by flash column chromatography (Silica, DCM/MeOH 1:0 to 94:6 then Hex/EtOAc 1:0 to 0:1) to afford **25r**, 18 mg (16%).

For NMR data see **25s**. LCMS: *m/z* 369.22 ([M+H]<sup>+</sup>, 100%); Rt 5.5 min, purity >98% DAD (180-450 nm). Converted to HCl salt for assay.

#### (R)-4-(2-(Indolin-1-yl)ethyl)-2-(((2-methylpyridin-3-yl)oxy)methyl)morpholine (26r)

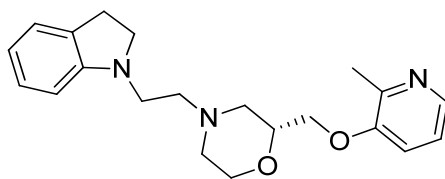

Same procedure as **18s** with alcohol **52** (80 mg, 0.30 mmol), 2-methyl-3-hydroxypyridine (50 mg, 0.46 mmol), triphenylphosphine (120 mg, 0.46 mmol), DIAD (90  $\mu$ L, 0.46 mmol) and tetrahydrofuran (1.5 mL). The crude mixture was purified by flash column chromatography (Silica, DCM/MeOH 1:0 to 94:6) to afford **26r**, 49 mg (46%).

$^1\text{H-NMR}$  (500 MHz,  $\text{CDCl}_3$ )  $\delta$ : 2.15-2.22 (m, 1H, 1 of  $(\text{CH}_2)_2\text{N}$ ), 2.30 (td, 1H,  $J = 11.3, 3.3$  Hz, 1 of  $(\text{CH}_2)_2\text{N}$ ), 2.47 (s, 3H, Me), 2.66 (t, 2H,  $J = 7.0$  Hz,  $\text{N}(\text{CH}_2)_2\text{N}$ ), 2.80-2.85 (m, 1H, 1 of  $(\text{CH}_2)_2\text{N}$ ), 2.97 (t, 2H,  $J = 8.3$  Hz,  $\text{ArCH}_2\text{CH}_2\text{N}$ ), 3.01-3.06 (m, 1H, 1 of  $(\text{CH}_2)_2\text{N}$ ), 3.21-3.31 (m, 2H,  $\text{N}(\text{CH}_2)_2\text{N}$ ), 3.36-3.46 (m, 2H,  $\text{ArCH}_2\text{CH}_2\text{N}$ ), 3.77 (td, 1H,  $J = 11.3, 2.5$  Hz, 1 of  $\text{OCH}_2\text{CH}_2$ ), 3.88-4.01 (m, 3H,  $\text{OCH} + 1$  of  $\text{OCH}_2\text{CH}_2 + 1$  of  $\text{OCH}_2\text{CH}$ ), 4.01-4.06 (m, 1H, 1 of  $\text{OCH}_2\text{CH}$ ), 6.49 (d, 1H,  $J = 7.7$  Hz,  $\text{ArH}$ ), 6.65 (td, 1H,  $J = 7.5, 0.9$  Hz,  $\text{ArH}$ ), 7.03-7.10 (m, 4H,  $\text{ArH}$ ), 8.07-8.10 (m, 1H,  $\text{ArH}$ ).  $^{13}\text{C-NMR}$  (125 MHz,  $\text{CDCl}_3$ )  $\delta$ : 19.4, 28.7, 47.0, 53.4, 53.7, 55.7, 56.2, 66.9, 69.3, 73.9, 106.7, 117.6, 117.7, 121.7, 124.5, 127.3, 129.9, 140.8, 149.1, 152.3, 153.0. LCMS:  $m/z$  354.22 ( $[\text{M}+\text{H}]^+$ , 100%);  $R_t$  5.1 min, purity >97% DAD (180-450 nm). HRMS: Found 354.2185  $\text{C}_{21}\text{H}_{27}\text{N}_3\text{O}_2$   $[\text{M} + \text{H}]^+$  requires 354.2176. Converted to HCl salt for assay.

**(S)-4-(2-(Indolin-1-yl)ethyl)-2-(((2-methylpyridin-3-yl)oxy)methyl)morpholine (26s)**

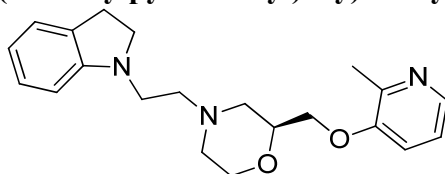

Same procedure as **18s** with alcohol **51** (80 mg, 0.30 mmol), 2-methyl-3-hydroxypyridine (50 mg, 0.46 mmol), triphenylphosphine (120 mg, 0.46 mmol), DIAD (90  $\mu$ L, 0.46 mmol) and tetrahydrofuran (1.5 mL). The crude mixture purified by flash column chromatography (Silica, DCM/MeOH 1:0 to 94:6) to afford **26s**, 75 mg (71%).

For NMR data see **26r**. Converted to HCl salt for assay.

**(S)-2-(((5-Chloropyridin-3-yl)oxy)methyl)-4-(2-(indolin-1-yl)ethyl)morpholine (27s)**

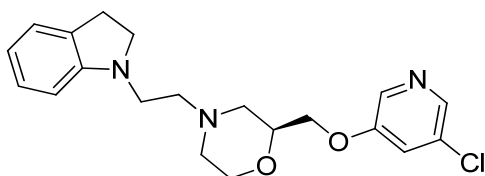

Same procedure as **18s** with alcohol **51** (80 mg, 0.30 mmol), 5-chloro-3-hydroxypyridine (59 mg, 0.46 mmol), triphenylphosphine (120 mg, 0.46 mmol), DIAD (90  $\mu$ L, 0.46 mmol) and tetrahydrofuran (1.5 mL). The crude mixture was purified twice by flash column chromatography (Silica, DCM/MeOH 1:0 to 94:6 then Hex/EtOAc 1:0 to 0:1) to afford **27s**, 71 mg (91%).

$^1\text{H-NMR}$  (500 MHz,  $\text{CDCl}_3$ )  $\delta$ : 2.13-2.20 (m, 1H, 1 of  $(\text{CH}_2)_2\text{N}$ ), 2.31 (td, 1H,  $J = 11.3, 3.3$  Hz, 1 of  $(\text{CH}_2)_2\text{N}$ ), 2.65 (t, 2H,  $J = 7.1$  Hz,  $\text{N}(\text{CH}_2)_2\text{N}$ ), 2.79-2.85 (m, 1H, 1 of  $(\text{CH}_2)_2\text{N}$ ), 2.92-3.00 (m, 3H,  $\text{ArCH}_2\text{CH}_2\text{N} + 1$  of  $(\text{CH}_2)_2\text{N}$ ), 3.25 (t, 2H,  $J = 7.1$  Hz,  $\text{N}(\text{CH}_2)_2\text{N}$ ), 3.36-3.45 (m, 2H,  $\text{ArCH}_2\text{CH}_2\text{N}$ ), 3.76 (td, 1H,  $J = 11.3, 2.4$  Hz, 1 of  $\text{OCH}_2\text{CH}_2$ ), 3.92-4.01 (m, 3H,  $\text{OCH} + 1$  of  $\text{OCH}_2\text{CH}_2 + 1$  of  $\text{OCH}_2\text{CH}$ ), 4.02-4.09 (m, 1H, 1 of  $\text{OCH}_2\text{CH}$ ), 6.49 (d, 1H,  $J = 7.7$  Hz,  $\text{ArH}$ ), 6.63-6.68 (m, 1H,  $\text{ArH}$ ), 7.04-7.10 (m, 2H,  $\text{ArH}$ ), 7.22-7.25 (m, 1H,  $\text{ArH}$ ), 8.20 (d, 1H,  $J = 2.0$  Hz,  $\text{ArH}$ ), 8.22 (d, 1H,  $J = 2.6$  Hz,  $\text{ArH}$ ).  $^{13}\text{C-NMR}$  (125 MHz,  $\text{CDCl}_3$ )  $\delta$ : 28.6, 47.0, 53.4, 53.7, 55.7, 56.3, 66.9, 69.5, 73.9, 106.7, 117.6, 121.3, 123.8, 124.5, 127.3, 129.9, 138.0, 139.7, 142.5, 152.3, 154.9. LCMS:  $m/z$  374.16 ( $[\text{M}+\text{H}]^+$ , 100%); Rt 5.3 min, purity = 91% DAD (180-450 nm). HRMS: Found 374.1619  $\text{C}_{20}\text{H}_{24}\text{N}_3\text{O}_2\text{Cl}$   $[\text{M} + \text{H}]^+$  requires 374.1630. Compound was re-purified to assay (36.7 mg, purity 100%). Converted to HCl salt for assay.

**(R)-2-(((5-Chloropyridin-3-yl)oxy)methyl)-4-(2-(indolin-1-yl)ethyl)morpholine (27r)**

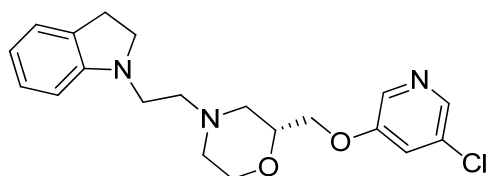

Same procedure as **18s** with alcohol **52** (80 mg, 0.30 mmol), 5-chloro-3-hydroxypyridine (59 mg, 0.46 mmol), triphenylphosphine (120 mg, 0.46 mmol), DIAD (90  $\mu\text{L}$ , 0.46 mmol) and tetrahydrofuran (1.5 mL). The crude mixture was purified by flash column chromatography (Silica, DCM/MeOH 1:0 to 94:6) to afford **27r**, 100 mg.

For NMR data see **27s**. LCMS:  $m/z$  374.16 ( $[\text{M}+\text{H}]^+$ , 100%); Rt 5.3 min, purity = 90% DAD (180-450 nm). A sample of **27r** was re-purified to assay (purity >97%). Converted to HCl salt for assay.

**(R)-4-(2-(Indolin-1-yl)ethyl)-2-(((6-methylpyridin-3-yl)oxy)methyl)morpholine (28r)**

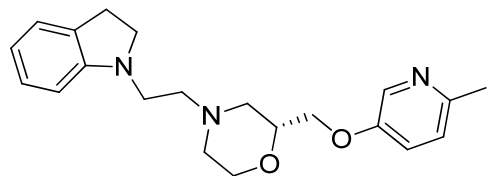

Same procedure as **18s** with alcohol **52** (80 mg, 0.30 mmol), 6-methyl-3-hydroxypyridine (50 mg, 0.46 mmol), triphenylphosphine (120 mg, 0.46 mmol), DIAD (90  $\mu\text{L}$ , 0.46 mmol) and tetrahydrofuran (1.5 mL). The crude mixture was purified by flash column chromatography (Silica, DCM/MeOH 1:0 to 94:6) to afford **28r**, 57 mg (54%).

$^1\text{H-NMR}$  (500 MHz,  $\text{CDCl}_3$ )  $\delta$ : 2.13-2.21 (m, 1H, 1 of  $(\text{CH}_2)_2\text{N}$ ), 2.31 (td, 1H,  $J = 11.4, 3.3$  Hz, 1 of  $(\text{CH}_2)_2\text{N}$ ), 2.48 (s, 3H, Me), 2.65 (t, 2H,  $J = 7.1$  Hz,  $\text{N}(\text{CH}_2)_2\text{N}$ ), 2.79-2.85 (m, 1H, 1 of  $(\text{CH}_2)_2\text{N}$ ), 2.92-2.99 (m, 3H,  $\text{ArCH}_2\text{CH}_2\text{N} + 1$  of  $(\text{CH}_2)_2\text{N}$ ), 3.22-3.27 (m, 2H,  $\text{N}(\text{CH}_2)_2\text{N}$ ), 3.35-3.44 (m, 2H,  $\text{ArCH}_2\text{CH}_2\text{N}$ ), 3.76 (td, 1H,  $J = 11.4, 2.4$  Hz, 1 of  $\text{OCH}_2\text{CH}_2$ ), 3.88-3.99 (m, 3H,  $\text{OCH} + 1$  of  $\text{OCH}_2\text{CH}_2 + 1$  of  $\text{OCH}_2\text{CH}$ ), 3.99-4.06 (m, 1H, 1 of  $\text{OCH}_2\text{CH}$ ), 6.48 (d, 1H,  $J = 7.7$  Hz,  $\text{ArH}$ ), 6.64 (td, 1H,  $J = 7.5, 0.8$  Hz,  $\text{ArH}$ ), 7.02-7.09 (m, 3H,  $\text{ArH}$ ), 7.13 (dd, 1H,  $J = 8.5, 3.0$  Hz,  $\text{ArH}$ ), 8.20 (d, 1H,  $J = 2.9$  Hz,  $\text{ArH}$ ).  $^{13}\text{C-NMR}$  (125 MHz,  $\text{CDCl}_3$ )  $\delta$ : 23.4, 28.6, 46.9, 53.3, 53.7, 55.7, 56.2, 66.8, 69.7, 73.9, 106.8, 117.7, 122.6, 123.6, 124.3, 127.3, 129.9, 136.3, 150.6, 152.3, 153.0. LCMS:  $m/z$  354.22

([M+H]<sup>+</sup>, 100%); Rt 5.1 min, purity >96% DAD (180-450 nm). HRMS: Found 354.2190 C<sub>21</sub>H<sub>28</sub>N<sub>3</sub>O<sub>2</sub> [M + H]<sup>+</sup> requires 354.2176. Converted to HCl salt for assay.

**(S)-4-(2-(Indolin-1-yl)ethyl)-2-(((6-methylpyridin-3-yl)oxy)methyl)morpholine (28s)**

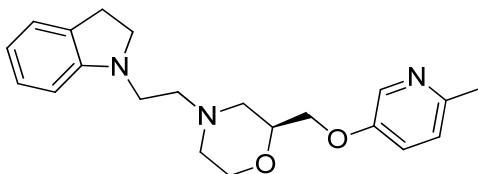

Same procedure as **18s** with alcohol **51** (80 mg, 0.30 mmol), 6-methyl-3-hydroxypyridine (50 mg, 0.46 mmol), triphenylphosphine (120 mg, 0.46 mmol), DIAD (90  $\mu$ L, 0.46 mmol) and tetrahydrofuran (1.5 mL). The crude mixture was purified by flash column chromatography (Silica, DCM/MeOH 1:0 to 94:6) to afford **28s**, 58 mg (55%).

For NMR data see **28r**. LCMS: m/z 354.22 ([M+H]<sup>+</sup>, 100%); Rt 5.1 min, purity >94% DAD (180-450 nm). Converted to HCl salt for assay.

**(R)-2-(((2,4-Dimethylpyridin-3-yl)oxy)methyl)-4-(2-(indolin-1-yl)ethyl)morpholine (29r)**

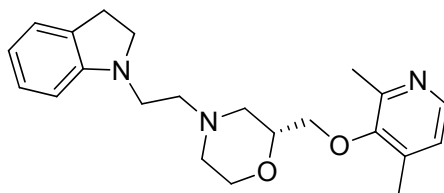

Same procedure as **18s** with alcohol **52** (80 mg, 0.30 mmol), 2,4-dimethyl-3-hydroxypyridine (57 mg, 0.46 mmol), triphenylphosphine (120 mg, 0.46 mmol), DIAD (90  $\mu$ L, 0.46 mmol) and tetrahydrofuran (1.5 mL). The crude mixture was purified by flash column chromatography (Silica, DCM/MeOH 1:0 to 94:6) to afford **29r**, 48 mg (44%).

<sup>1</sup>H-NMR (500 MHz, CDCl<sub>3</sub>)  $\delta$ : 2.17-2.24 (m, 1H, 1 of (CH<sub>2</sub>)<sub>2</sub>N), 2.29-2.38 (m, 4H, 1 of (CH<sub>2</sub>)<sub>2</sub>N + Me), 2.53 (s, 3H, Me), 2.68 (t, 2H, *J* = 7.1 Hz, N(CH<sub>2</sub>)<sub>2</sub>N), 2.83-2.88 (m, 1H, 1 of (CH<sub>2</sub>)<sub>2</sub>N), 2.96-3.05 (m, 3H, ArCH<sub>2</sub>CH<sub>2</sub>N + 1 of (CH<sub>2</sub>)<sub>2</sub>N), 3.26-3.32 (m, 2H, N(CH<sub>2</sub>)<sub>2</sub>N), 3.39-3.48 (m, 2H, ArCH<sub>2</sub>CH<sub>2</sub>N), 3.76-3.89 (m, 3H, OCH + OCH<sub>2</sub>CH<sub>2</sub>), 3.96-4.03 (m, 2H, OCH<sub>2</sub>CH), 6.51 (d, 1H, *J* = 7.7 Hz, ArH), 6.65-6.70 (m, 1H, ArH), 6.97 (d, 1H, *J* = 4.9 Hz, ArH), 7.05-7.12 (m, 2H, ArH), 8.14 (d, 1H, *J* = 4.9 Hz, ArH). <sup>13</sup>C-NMR (125 MHz, CDCl<sub>3</sub>)  $\delta$ : 15.7, 19.4, 28.6, 46.9, 53.3, 53.7, 55.7, 56.3, 66.8, 73.5, 74.6, 106.7, 117.6, 124.2, 124.5, 127.3, 129.9, 139.7, 144.4, 152.2, 152.3. LCMS: m/z 368.23 ([M+H]<sup>+</sup>, 100%); Rt 5.1 min, purity >99% DAD (180-450 nm). HRMS: Found 368.2333 C<sub>22</sub>H<sub>30</sub>N<sub>3</sub>O<sub>2</sub> [M + H]<sup>+</sup> requires 368.2333. Converted to HCl salt for assay.

## 5. *In vitro* metabolic stability

Each test compound (0.5 $\mu$ M) was incubated with pooled female mouse liver microsomes (Tebu-Bio, UK; 0.5mg/mL 50mM potassium phosphate buffer, pH7.4) and the reaction started with addition of excess NADPH (8mg/mL 50mM potassium phosphate buffer, pH7.4). Immediately, at time zero, then at 3, 6, 9, 15 and 30 minutes an aliquot (50 $\mu$ L) of the incubation mixture was removed and mixed with acetonitrile (100 $\mu$ L) to stop the reaction. Internal standard was added to all samples, the samples centrifuged to sediment precipitated protein and the plates then sealed prior to UPLCMSMS analysis using a Quattro Premier XE (Waters, USA).

XLfit (IDBS, UK) was used to calculate the exponential decay and consequently the rate constant (k) from the ratio of peak area of test compound to internal standard at each timepoint. The rate of intrinsic clearance (CL<sub>i</sub>) of each compound was then calculated using the following equation below

$$CL_i(\text{mL}/\text{min}/\text{g liver}) = k \times V \times \text{Microsomal protein yield}$$

Where V (mL/mg protein) is the incubation volume/mg protein added and microsomal protein yield is taken as 52.5mg protein/ g liver

Verapamil was used as a positive control to confirm acceptable assay performance.

| Compound | CL <sub>i</sub> |
|----------|-----------------|
| 9a       | 31.1mL/min/g    |
| 9b       | >50mL/min/g     |
| 11a      | 7.7mL/min/g     |
| 11b      | 14.6mL/min/g    |
| 13       | 13.8mL/min/g    |
| 27s      | 25 mL/min/g     |

## 6. Assessment of brain penetration and brain tissue binding

### 6.1. Brain penetration

Test compound was dosed intravenously at 1mg free base/kg to female NMRI mice (n=3 mice/compound). Dose formulation was 10% DMSO:90% saline and dose volume was 5mL/kg. Each mouse was placed under terminal anaesthesia with isoflurane at 5 minutes post-dose. Blood was taken by cardiac puncture into two volumes distilled water and the brain removed. After suitable sample preparation, the concentration of test compound in blood and brain was determined by UPLCMSMS using a Quattro Premier XE (Waters, USA) and the brain: blood ratio determined.

Compound **13** was dosed intraperitoneally at 10mg free base/kg to female NMRI mice (n=6). Dose formulation was 10% DMSO;40% PEG400;50% MilliQ water and dose volume was 10mL/kg. Mice (n=3) were placed under terminal anaesthesia with isoflurane at 15 minutes or 60 minutes post-dose. Blood was taken by cardiac puncture into two volumes distilled water and the brain removed. After suitable sample preparation, the concentration of test

compound in blood and brain was determined by UPLCMSMS using a Quattro Premier XE (Waters, USA) and the brain: blood ratio determined.

| Mouse | Time | Blood Conc (ng/ml) | Brain conc. (ng/ml) | Brain:Blood Ratio | Mean B:B ratio |
|-------|------|--------------------|---------------------|-------------------|----------------|
| 1     | 15   | 197                | 2025                | 10.29             | 9.8            |
| 2     |      | 216                | 1943                | 9.01              |                |
| 3     |      | 142                | 1422                | 10.04             |                |
| 4     | 60   | 71                 | 590                 | 8.29              | 8.5            |
| 5     |      | 86                 | 699                 | 8.18              |                |
| 6     |      | 81                 | 735                 | 9.11              |                |

## 6.2 Assessment of brain tissue binding

The methodology employed was a modification of that reported previously.<sup>5</sup> In brief, a 96 well equilibrium dialysis apparatus was used to determine the free fraction in the brain for the test compound (HT Dialysis LLC, Gales Ferry, CT). Membranes (12-14kDA cut-off) were conditioned in deionised water for 60 minutes, followed by conditioning in 80:20 deionised water:ethanol for 20 minutes, and then rinsed in artificial cerebrospinal fluid (CSF) before use. Mouse brain was removed from the freezer and allowed to thaw on the day of experiment. Thawed brain tissue was homogenised with artificial CSF to a final composition of 1:2 brain:artificial CSF using a Covaris S2 (K Biosciences, Hoddesdon, UK). Diluted brain homogenate was spiked with the test compound (10 ug/g), and 150µL aliquots (n=6 replicate determinations) loaded into the 96-well equilibrium dialysis plate. Dialysis vs artificial CSF (150µL) was carried out for 5 hours in a temperature controlled incubator at *ca.* 37°C (Barworld scientific Ltd, UK) using an orbital microplate shaker at 125 revolutions/minute (Barworld scientific Ltd, UK). At the end of the incubation period, aliquots of brain homogenate or artificial CSF were transferred to micronic tubes (Micronic B.V., the Netherlands) and the composition in each tube balanced with control fluid, such that the volume of artificial CSF to brain is the same. Sample extraction was performed by the addition of 400µL of acetonitrile containing an appropriate internal standard. Samples were allowed to mix for 1 minute and then centrifuged at 3000rpm in 96-well blocks for 15 minutes (Allegra X12-R, Beckman Coulter, USA). All samples were analysed by means of UPLC/MS/MS on a Quattro Premier XE Mass Spectrometer (Waters Corporation, USA). The unbound fraction was determined as the ratio of the peak area in artificial CSF to that in brain, with correction for dilution factor according to equation below<sup>6</sup>

$$Undiluted f_u = \frac{1/D}{1/f_{u,apparent} - 1 + 1/D}$$

where D = dilution factor in brain homogenate and  $f_{u,apparent}$  is the measured free fraction of diluted brain homogenate.

Compound **13** Brain  $F_u = 0.184$

## 7. Detailed Behavioural Results

**Open field activity:** Locomotor activity for D4R-WT and KO mice was aggregated into three 20-min blocks. A three-way repeated measures ANOVA (RMANOVA) for distance traveled observed significant main effects of time [ $F_{(2,98)}=55.573$ ,  $p<0.001$ ], a significant time by genotype interaction [ $F_{(2,98)}=6.679$ ,  $p<0.002$ ], and a significant time by genotype by treatment interaction [ $F_{(2,98)}=3.167$ ,  $p<0.017$ ] (Fig. 4c). Bonferroni corrected pair-wise comparisons found that vehicle-treated D4R-WT mice had decreased locomotion at 21-40 and 41-60 min compared to the 0-20 min time-point ( $ps<0.001$ ). In D4R-WT animals 0.7 mg/kg compound **13** was without effect; however, the 1 mg/kg dose reduced activity during the first 20 min relative to animals given vehicle ( $p<0.003$ ). Locomotor activities in vehicle- or compound **13**-treated D4R-KO mice did not differ within any of the time-points. Nevertheless, the 1 mg/kg dose attenuated activity at 21-40 and 41-60 min relative to 0-20 min ( $ps<0.005$ ). When locomotion was examined between genotypes, activity was higher at 41-60 min in vehicle-treated D4R-KO mice than in any of the three D4R-WT groups ( $ps<0.022$ ). Responses to compound **13** were not distinguished by genotype.

In PC7 mice a RMANOVA for locomotion found the within subject effects for time [ $F_{(2,72)}=21.651$ ,  $p<0.001$ ] and the time by treatment [ $F_{(2,72)}=6.250$ ,  $p<0.001$ ] and the time by treatment by genotype [ $F_{(2,72)}=3.387$ ,  $p<0.039$ ] interactions to be significant (Supplementary Fig. 10a). Bonferroni comparisons noted that locomotor activity in vehicle-treated PC7-WT mice was decreased at 41-60 min relative to the first 20 min ( $p<0.001$ ). No changes in locomotion were observed across time in compound **13**-treated PC7-WT animals. Nevertheless, locomotion in PC7-WT mice administered 1 mg/kg compound **13** was higher than that in the animals given vehicle at 41-60 min ( $p<0.044$ ). Vehicle-treated PC7-KO showed no evidence of habituation, whereas a diminution in activity was seen with compound **13** at all time-points relative to vehicle-treated mutants ( $ps<0.005$ ). Robust genotype differences in locomotion were observed in vehicle-treated PC7-KO mice relative to the PC7-WT vehicle controls at all time points ( $ps<0.001$ ).

When time in the center zone of the open field was analyzed for D4R mice, a three-way RMANOVA reported that only the time by genotype [ $F_{(2,98)}=5.248$ ,  $p<0.007$ ] and time by treatment by genotype interactions were significant [ $F_{(2,98)}=2.554$ ,  $p<0.044$ ] (Fig. 4d). For D4R-WT mice Bonferroni tests showed that time spent in the center zone at 0-20 min was increased with both doses of compound **13** compared to the vehicle controls ( $ps<0.006$ ) and this center time was similar to that of the D4R-KO mice. Although the 0.7 mg/kg dose in D4R-WT animals marginally enhanced time spent in the center zone relative to the vehicle at 41-60 min ( $p=0.06$ ), the 1.0 mg/kg dose exerted no significant effects at any time. In D4R-KO mice the 0.7 mg/kg dose was without effect. By comparison the 1 mg/kg dose in D4R-KO animals reduced time spent in the center zone during the final 20 min of testing ( $ps<0.053$ ) compared to the vehicle or the 0.7 mg/kg dose. Additionally, vehicle-treated D4R-KO mice spent more time in the center than the respective D4R-WT animals at 21-40 and 41-60 min ( $ps<0.023$ ).

In PC7 mice, a repeated measures ANOVA for time spent in the center zone only found the time by genotype by treatment interaction to be significant [ $F_{(2,72)}=5.926$ ,  $p<0.004$ ] (Supplementary Fig. 10b). Bonferroni tests reported that PC7-KO mice administered 1 mg/kg compound **13** spent more time in the center of the open field than the PC7-KO vehicle controls at 0-20 min ( $p<0.047$ ).

**Hole-board test:** A two-way ANOVA for the rate of head-pokes by D4R animals demonstrated significant main effects of genotype [ $F_{(1,45)}=29.579$ ,  $p<0.001$ ] and a significant genotype by treatment interaction [ $F_{(2,45)}=6.815$ ,  $p<0.003$ ] (Fig. 4e). Bonferroni pair-wise comparisons noted that head-poke rates were higher in D4R-KO mice than in the respective D4R-WT animals given either vehicle or 0.7 mg/kg compound **13** ( $p_s<0.001$ ). Nonetheless, rates were similar between genotypes with the 1 mg/kg dose. While in D4R-WT mice the 0.7 mg/kg dose potentiated the rate of head-pokes, only the 1 mg/kg dose significantly increased this rate above that of animals receiving the vehicle ( $p<0.053$ ). Interestingly, the rate of head pokes for D4R-WT animals given the 1 mg/kg dose was similar to that for the three groups of D4R-KO mice. In D4R-KO animals, the 0.7 mg/kg dose exerted no effects. By contrast 1 mg/kg compound **13** reduced this rate relative to the vehicle or the 0.7 mg/kg dose ( $p_s<0.043$ ).

In PC7 mice the two-way ANOVA detected only the genotype by treatment interaction to be significant [ $F_{(1,35)}=3.686$ ,  $p<0.053$ ] (Supplementary Fig. 10c). Bonferroni tests confirmed that the rate of head pokes was higher for vehicle-treated PC7-KO mice than PC7-WT controls ( $p<0.043$ ). Notably, 1 mg/kg compound 13 enhanced head-pokes in the PC7-WT animals ( $p<0.032$ ) to levels that were not different from those of the PC7-KO vehicle controls. Conversely, in PC7-KO mice this same dose depressed head-pokes ( $p<0.037$ ).

**Elevated zero maze:** In D4R mice a two-way ANOVA for percent time in the open areas noted significant main effects of genotype [ $F_{(1,54)}=20.395$ ,  $p<0.001$ ] and treatment [ $F_{(2,54)}=3.998$ ,  $p<0.024$ ], and a significant genotype by treatment interaction [ $F_{(2,54)}=3.151$ ,  $p<0.051$ ] (Fig. 4f). Bonferroni corrected pair-wise comparisons found that vehicle- and 0.7 mg/kg-treated D4R-KO mice spent more time in the open areas than the respective D4R-WT animals ( $p_s<0.011$ ); no genotype differences were detected between genotypes given 1 mg/kg compound **13**. D4R-WT mice administered the 0.7 mg/kg dose showed marginal increases in open area time compared to the vehicle controls. Nevertheless, open area time was significantly augmented with the 1 mg/kg dose ( $p<0.048$ ) in DR4-WT mice relative to similar conspecifics given vehicle or 0.7 mg/kg compound **13**. In contrast, the compound was without effect in D4R-KO mice.

In PC7 mice the ANOVA revealed significant main effects of genotype [ $F_{(1,40)}=10.143$ ,  $p<0.001$ ] and a significant treatment by genotype interaction [ $F_{(1,40)}=7.205$ ,  $p<0.011$ ] (Supplementary Fig. 10d). Bonferroni corrected pair-wise comparisons showed that vehicle-treated PC7-KO mice spent significantly more time in the open areas than similarly treated WT controls ( $p<0.001$ ); no genotype differences were seen with the 1 mg/kg dose. In PC7-WT animals 1 mg/kg compound **13** increased open area time relative to the vehicle controls ( $p<0.048$ ), whereas this same dose reduced open area time in the PC7-KO mice ( $p<0.052$ ).

#### **Statistics details and legend for figure 4 c-f and supplementary information figure 10:**

Note:  $p$ -values are rounded to the nearest 0.05 value [example,  $p<0.0549$  would round to  $p<0.05$  whereas  $p<0.0550$  would round to  $p<0.06$  and be considered not significant (N.S.) or marginally significant].



**Supplementary Table 1a:** High confidence Bayesian model predictions against 20 GPCRs

| Compound Name     | 5-HT1a | 5-HT1b | 5-HT1d | 5-HT1e | 5-HT2a | 5-HT2b | 5-HT2c | 5-HT3 | 5-HT4 | 5-HT5a | 5-HT6 | 5-HT7 |
|-------------------|--------|--------|--------|--------|--------|--------|--------|-------|-------|--------|-------|-------|
| Donepezil (Cpd 1) | -12.5  | -11.1  | -13.2  | -4.1   | -1.4   | -0.9   | -2.3   | -2.2  | -10.4 | -10.6  | -15.6 | -6.9  |
| Compound 2        | 93.1   | 28.4   | -3     | -4     | 53.3   | 32     | 41.8   | 7     | -18.5 | 9.1    | -6.4  | 67.4  |
| Compound 3        | 81.7   | 27.4   | -6.3   | -3.5   | 48.9   | 37.2   | 41.1   | 12.9  | -13.2 | 7.9    | -12.4 | 65.2  |
| Compound 4        | 87.7   | 36.1   | -7.7   | -4.7   | 51.4   | 29.9   | 47.1   | 7.4   | -20   | 4.3    | -6.2  | 61.8  |
| Compound 5        | 88.2   | 24.6   | -6.6   | -4.1   | 50.6   | 27.2   | 37.8   | 6.2   | -18   | 8.6    | -7.7  | 67    |
| Compound 6        | 76.4   | 12.5   | -17.1  | -4.6   | 52.8   | 19.3   | 55     | 0.6   | -15.7 | 3.7    | -9.4  | 35.1  |
| Compound 7        | 67.8   | 2.5    | -15.3  | -3.6   | 50     | 22.8   | 47.9   | 5.7   | -5.9  | 5.1    | -13.8 | 34.4  |
| Compound 8        | 81.8   | 4.8    | -12.4  | -3.9   | 54.7   | 21.4   | 49.8   | 0.2   | -14.2 | 8.4    | -9.6  | 40.7  |
| Compound 9a       | 90.5   | 2.8    | -17.2  | -1.9   | 60.2   | 30.4   | 54.3   | -3.2  | -18.6 | 6.4    | -12.4 | 53.2  |
| Compound 9b       | 91.4   | 0.1    | -19.6  | -2.2   | 57.6   | 26.5   | 51.4   | -3.9  | -19.2 | 3.4    | -15.5 | 57.1  |
| Compound 10a      | 103.5  | 26.4   | -9.3   | -3.3   | 59.4   | 41.6   | 47.6   | 3.9   | -17.8 | 7.5    | -9    | 81.1  |
| Compound 10b      | 104.4  | 23.6   | -11.7  | -3.6   | 56.8   | 37.7   | 44.7   | 3.2   | -18.4 | 4.5    | -12   | 85    |
| Compound 11a      | 78.3   | 0.2    | -19.5  | -1.8   | 41.4   | 23.7   | 18.7   | -8.7  | -26.1 | -3.6   | -21.8 | 46.5  |
| Compound 11b      | 79.2   | -2.5   | -21.9  | -2.1   | 38.8   | 19.8   | 15.9   | -9.3  | -26.8 | -6.6   | -24.8 | 50.4  |
| Compound 12       | 14.1   | 0.4    | -1.4   | -3.2   | 19.6   | 6.8    | 8.7    | 5.1   | -25.4 | -4.8   | -15.4 | 27    |
| Compound 13       | -9.8   | -9.5   | -7     | -4.1   | 2.4    | 3.4    | -1.5   | -3.1  | -27.6 | -8.5   | -22.4 | 2.1   |
| Compound 14r      | -1.9   | -14.2  | -13.5  | -2.4   | -8.6   | -4     | -5.6   | -5.7  | -14.9 | -13.7  | -29.4 | 2.3   |
| Compound 15r      | 14.7   | 3      | -5.9   | -3.5   | 13.4   | 10.9   | 20     | -2.1  | -13.7 | -7.6   | -17.9 | 11.6  |
| Compound 16r      | -13.1  | -14.7  | -14.8  | -3     | -9.8   | -3.9   | -7.2   | -2    | -16.1 | -16.2  | -29   | 5.4   |
| Compound 17r      | 3.5    | 2.5    | -7.2   | -4.1   | 12.1   | 11.1   | 18.5   | 1.6   | -14.9 | -10    | -17.5 | 14.7  |
| Compound 18s      | -12.9  | -12.9  | -14.2  | -2.5   | -8.7   | -9.6   | -6.4   | -6.6  | -16.8 | 5      | -26.3 | 5.2   |
| Compound 19s      | 3.7    | 4.3    | -6.6   | -3.5   | 13.3   | 5.4    | 19.3   | -3    | -15.6 | 11.1   | -14.8 | 14.6  |
| Compound 20r      | -23.8  | -18.9  | -18.6  | -2.8   | -16.7  | -8     | -14.5  | -7.9  | -25.3 | -13.8  | -40.1 | -5.6  |
| Compound 20s      | -23.8  | -18.9  | -18.6  | -2.8   | -16.7  | -8     | -14.5  | -7.9  | -25.3 | -13.8  | -40.1 | -5.6  |
| Compound 21r      | -7.2   | -1.7   | -11    | -3.8   | 5.3    | 7      | 11.2   | -4.3  | -24   | -7.6   | -28.7 | 3.7   |
| Compound 21s      | -7.2   | -1.7   | -11    | -3.8   | 5.3    | 7      | 11.2   | -4.3  | -24   | -7.6   | -28.7 | 3.7   |
| Compound 22r      | -3.8   | -13.3  | -13.3  | -2.3   | -4     | -5.7   | -6.1   | -2.4  | -10.4 | -1.9   | -21.4 | 3.7   |
| Compound 22s      | -3.8   | -13.3  | -13.3  | -2.3   | -4     | -5.7   | -6.1   | -2.4  | -10.4 | -1.9   | -21.4 | 3.7   |
| Compound 23r      | 12.7   | 3.9    | -5.7   | -3.3   | 17.9   | 9.2    | 19.6   | 1.2   | -9.1  | 4.2    | -9.9  | 13.1  |
| Compound 23s      | 12.7   | 3.9    | -5.7   | -3.3   | 17.9   | 9.2    | 19.6   | 1.2   | -9.1  | 4.2    | -9.9  | 13.1  |
| Compound 24s      | -6.8   | -13.4  | -15.3  | -2.9   | -10.3  | -8.9   | -9.1   | -6.4  | -11.2 | 0.9    | -22.2 | 6.3   |
| Compound 25r      | 9.7    | 3.8    | -7.7   | -4     | 11.6   | 6      | 16.6   | -2.8  | -9.9  | 7.1    | -10.8 | 15.6  |
| Compound 25s      | 9.7    | 3.8    | -7.7   | -4     | 11.6   | 6      | 16.6   | -2.8  | -9.9  | 7.1    | -10.8 | 15.6  |
| Compound 26r      | 1.7    | 1      | -11.7  | -4.8   | 11.5   | 13.4   | 18.2   | 1.9   | -14.7 | -9.4   | -16.3 | 13.8  |
| Compound 26s      | 1.7    | 1      | -11.7  | -4.8   | 11.5   | 13.4   | 18.2   | 1.9   | -14.7 | -9.4   | -16.3 | 13.8  |
| Compound 27r      | -3.8   | -0.4   | -10.3  | -3.7   | 8.2    | 8.5    | 13.9   | 0.3   | -10.9 | -4.6   | -19.3 | 8.9   |
| Compound 27s      | -3.8   | -0.4   | -10.3  | -3.7   | 8.2    | 8.5    | 13.9   | 0.3   | -10.9 | -4.6   | -19.3 | 8.9   |
| Compound 28r      | -5.2   | -1.1   | -9.5   | -4.9   | 8.3    | 8.7    | 15.4   | -1.2  | -15.7 | -5.6   | -17.7 | 9.4   |
| Compound 28s      | -5.2   | -1.1   | -9.5   | -4.9   | 8.3    | 8.7    | 15.4   | -1.2  | -15.7 | -5.6   | -17.7 | 9.4   |
| Compound 29r      | 0      | 0.8    | -9.7   | -4.6   | 8.9    | 10.1   | 16.2   | 0.4   | -16.9 | -10.4  | -18.9 | 11.8  |

| Compound Name     | Alpha-1a | Alpha-1b | Alpha-1d | D1   | D2    | D3   | D4    | D5   |
|-------------------|----------|----------|----------|------|-------|------|-------|------|
| Donepezil (Cpd 1) | -5.7     | -10.7    | -8.5     | 6.8  | 9     | 22.7 | 26.3  | -3.6 |
| Compound 2        | 68.3     | 64       | 65.1     | 43.9 | 81.3  | 66.2 | 54    | 36.2 |
| Compound 3        | 78.6     | 66.4     | 74.6     | 47.4 | 79.8  | 77.9 | 52.3  | 33.8 |
| Compound 4        | 70       | 64.4     | 69.3     | 48   | 79.4  | 64.6 | 56.6  | 31.7 |
| Compound 5        | 67.6     | 62.8     | 64       | 39.3 | 75.8  | 67.4 | 53.3  | 34.2 |
| Compound 6        | 42       | 25.8     | 38.7     | 52.3 | 89.4  | 83.9 | 67.7  | 21.7 |
| Compound 7        | 51.3     | 27.8     | 44.1     | 47.2 | 85.3  | 90.2 | 61.4  | 22.9 |
| Compound 8        | 40.2     | 25.5     | 34.5     | 48.2 | 91.3  | 85.5 | 65    | 26.2 |
| Compound 9a       | 44.6     | 27.4     | 36.8     | 64.6 | 101.6 | 95.8 | 73.3  | 35.9 |
| Compound 9b       | 47       | 32.6     | 40.1     | 62.7 | 103.4 | 92.9 | 69.4  | 36.8 |
| Compound 10a      | 74.4     | 67.3     | 69.1     | 60.4 | 92.6  | 78.1 | 63.1  | 46.3 |
| Compound 10b      | 76.8     | 72.4     | 72.4     | 58.4 | 94.4  | 75.2 | 59.2  | 47.3 |
| Compound 11a      | 35.5     | 28.9     | 29.1     | 17.4 | 77.9  | 55.3 | 70.2  | 19.9 |
| Compound 11b      | 37.9     | 34       | 32.3     | 15.4 | 79.7  | 52.3 | 66.2  | 20.9 |
| Compound 12       | 7.8      | 10.5     | 9.5      | 18.7 | 72.6  | 20.6 | 111.1 | 19.2 |
| Compound 13       | -18.8    | -15.8    | -19.5    | 6.3  | 67.7  | 10.3 | 112.1 | 3.1  |
| Compound 14r      | -11.7    | -9.7     | -11.1    | -1.3 | 27.9  | -1.8 | 84    | 13.3 |
| Compound 15r      | 8.3      | 6.7      | 7.2      | 14   | 16.3  | 14.2 | 61.3  | 18.9 |
| Compound 16r      | -11.9    | -11.4    | -11.6    | 0.4  | 22.3  | -3.2 | 82.6  | 12.2 |
| Compound 17r      | 8        | 5        | 6.8      | 15.6 | 10.7  | 12.7 | 59.9  | 17.8 |
| Compound 18s      | -21.6    | -17.8    | -20.2    | 1.5  | 29.5  | 0.6  | 88.8  | 20.4 |
| Compound 19s      | -1.7     | -1.5     | -1.8     | 16.8 | 17.9  | 16.6 | 66.1  | 26   |
| Compound 20r      | -24.1    | -20.5    | -22.8    | -7.7 | 14.6  | -9.7 | 77.2  | 10   |
| Compound 20s      | -24.1    | -20.5    | -22.8    | -7.7 | 14.6  | -9.7 | 77.2  | 10   |
| Compound 21r      | -4.1     | -4.1     | -4.4     | 7.6  | 3     | 6.2  | 54.5  | 15.6 |
| Compound 21s      | -4.1     | -4.1     | -4.4     | 7.6  | 3     | 6.2  | 54.5  | 15.6 |
| Compound 22r      | -17.3    | -16.6    | -17.9    | 1.4  | 32.2  | 2.5  | 89.7  | 23.6 |
| Compound 22s      | -17.3    | -16.6    | -17.9    | 1.4  | 32.2  | 2.5  | 89.7  | 23.6 |
| Compound 23r      | 2.7      | -0.3     | 0.4      | 16.7 | 20.6  | 18.5 | 67    | 29.1 |
| Compound 23s      | 2.7      | -0.3     | 0.4      | 16.7 | 20.6  | 18.5 | 67    | 29.1 |
| Compound 24s      | -19.3    | -16.3    | -18.7    | -1.7 | 25    | -0.4 | 86.2  | 26   |
| Compound 25r      | 0.6      | 0        | -0.4     | 13.6 | 13.4  | 15.5 | 63.5  | 31.6 |
| Compound 25s      | 0.6      | 0        | -0.4     | 13.6 | 13.4  | 15.5 | 63.5  | 31.6 |
| Compound 26r      | 11.8     | 10.6     | 11       | 16.8 | 11.6  | 15.8 | 74.8  | 18.7 |
| Compound 26s      | 11.8     | 10.6     | 11       | 16.8 | 11.6  | 15.8 | 74.8  | 18.7 |
| Compound 27r      | -1.5     | -2.8     | -2.7     | 16   | 6.1   | 10.9 | 58.1  | 23   |
| Compound 27s      | -1.5     | -2.8     | -2.7     | 16   | 6.1   | 10.9 | 58.1  | 23   |
| Compound 28r      | -1       | -0.8     | -0.8     | 12.1 | 3     | 8.5  | 55.6  | 19.8 |
| Compound 28s      | -1       | -0.8     | -0.8     | 12.1 | 3     | 8.5  | 55.6  | 19.8 |
| Compound 29r      | 5.9      | 3.2      | 4.4      | 16.4 | 9.6   | 13.7 | 57.7  | 18.2 |

**Supplementary Table 1b:** All compound Bayesian model predictions for compounds 1 to 8

| Compound Name     | 5-HT1a | 5-HT1b | 5-HT1d | 5-HT1e | 5-HT2a | 5-HT2b | 5-HT2c | 5-HT3 | 5-HT4 | 5-HT5a | 5-HT6 | 5-HT7 |
|-------------------|--------|--------|--------|--------|--------|--------|--------|-------|-------|--------|-------|-------|
| Donepezil (Cpd 1) | -12.5  | -11.1  | -13.2  | -4.1   | -1.4   | -0.9   | -2.3   | -2.2  | -10.4 | -10.6  | -15.6 | -6.9  |
| Compound 2        | 93.1   | 28.4   | -3     | -4     | 53.3   | 32     | 41.8   | 7     | -18.5 | 9.1    | -6.4  | 67.4  |
| Compound 3        | 81.7   | 27.4   | -6.3   | -3.5   | 48.9   | 37.2   | 41.1   | 12.9  | -13.2 | 7.9    | -12.4 | 65.2  |
| Compound 4        | 87.7   | 36.1   | -7.7   | -4.7   | 51.4   | 29.9   | 47.1   | 7.4   | -20   | 4.3    | -6.2  | 61.8  |
| Compound 5        | 88.2   | 24.6   | -6.6   | -4.1   | 50.6   | 27.2   | 37.8   | 6.2   | -18   | 8.6    | -7.7  | 67    |
| Compound 6        | 76.4   | 12.5   | -17.1  | -4.6   | 52.8   | 19.3   | 55     | 0.6   | -15.7 | 3.7    | -9.4  | 35.1  |
| Compound 7        | 67.8   | 2.5    | -15.3  | -3.6   | 50     | 22.8   | 47.9   | 5.7   | -5.9  | 5.1    | -13.8 | 34.4  |
| Compound 8        | 81.8   | 4.8    | -12.4  | -3.9   | 54.7   | 21.4   | 49.8   | 0.2   | -14.2 | 8.4    | -9.6  | 40.7  |

| Compound Name     | Alpha-1a | Alpha-1b | Alpha-1d | D1   | D2   | D3   | D4   | D5    |
|-------------------|----------|----------|----------|------|------|------|------|-------|
| Donepezil (Cpd 1) | -5.7     | -10.7    | -8.5     | 11.3 | 24.6 | 29.2 | 35.3 | -21.6 |
| Compound 2        | 68.3     | 64       | 65.1     | 42.4 | 91.7 | 71.3 | 62.9 | 4.3   |
| Compound 3        | 78.6     | 66.4     | 74.6     | 48.4 | 91.8 | 80.5 | 62.9 | 4.8   |
| Compound 4        | 70       | 64.4     | 69.3     | 44   | 89.4 | 67.1 | 63.3 | 3.8   |
| Compound 5        | 67.6     | 62.8     | 64       | 37.8 | 86.5 | 72.4 | 62.2 | 1.4   |
| Compound 6        | 42       | 25.8     | 38.7     | 47.2 | 97.6 | 84.3 | 74   | -6.6  |
| Compound 7        | 51.3     | 27.8     | 44.1     | 46.2 | 94   | 93.1 | 70.2 | -7.8  |
| Compound 8        | 40.2     | 25.5     | 34.5     | 45.6 | 99.9 | 88.6 | 73.6 | -6.1  |

**Supplementary Table 1c:** High confidence Bayesian predictions for Figure 3b

| Compound Name     | 5-HT1a | 5-HT1b | 5-HT1d | 5-HT1e | 5-HT2a | 5-HT2b | 5-HT2c | 5-HT3 | 5-HT4 | 5-HT5a | 5-HT6 | 5-HT7 |
|-------------------|--------|--------|--------|--------|--------|--------|--------|-------|-------|--------|-------|-------|
| Donepezil (Cpd 1) | -12.5  | -11.1  | -13.2  | -4.1   | -1.4   | -0.9   | -2.3   | -2.2  | -10.4 | -10.6  | -15.6 | -6.9  |
| Compound 5        | 88.2   | 24.6   | -6.6   | -4.1   | 50.6   | 27.2   | 37.8   | 6.2   | -18   | 8.6    | -7.7  | 67    |
| Compound 9a       | 90.5   | 2.8    | -17.2  | -1.9   | 60.2   | 30.4   | 54.3   | -3.2  | -18.6 | 6.4    | -12.4 | 53.2  |
| Compound 9b       | 91.4   | 0.1    | -19.6  | -2.2   | 57.6   | 26.5   | 51.4   | -3.9  | -19.2 | 3.4    | -15.5 | 57.1  |
| Compound 10a      | 103.5  | 26.4   | -9.3   | -3.3   | 59.4   | 41.6   | 47.6   | 3.9   | -17.8 | 7.5    | -9    | 81.1  |
| Compound 10b      | 104.4  | 23.6   | -11.7  | -3.6   | 56.8   | 37.7   | 44.7   | 3.2   | -18.4 | 4.5    | -12   | 85    |
| Compound 11a      | 78.3   | 0.2    | -19.5  | -1.8   | 41.4   | 23.7   | 18.7   | -8.7  | -26.1 | -3.6   | -21.8 | 46.5  |
| Compound 11b      | 79.2   | -2.5   | -21.9  | -2.1   | 38.8   | 19.8   | 15.9   | -9.3  | -26.8 | -6.6   | -24.8 | 50.4  |

| Compound Name     | Alpha-1a | Alpha-1b | Alpha-1d | D1   | D2    | D3   | D4   | D5   |
|-------------------|----------|----------|----------|------|-------|------|------|------|
| Donepezil (Cpd 1) | -5.7     | -10.7    | -8.5     | 6.8  | 9     | 22.7 | 26.3 | -3.6 |
| Compound 5        | 67.6     | 62.8     | 64       | 39.3 | 75.8  | 67.4 | 53.3 | 34.2 |
| Compound 9a       | 44.6     | 27.4     | 36.8     | 64.6 | 101.6 | 95.8 | 73.3 | 35.9 |
| Compound 9b       | 47       | 32.6     | 40.1     | 62.7 | 103.4 | 92.9 | 69.4 | 36.8 |
| Compound 10a      | 74.4     | 67.3     | 69.1     | 60.4 | 92.6  | 78.1 | 63.1 | 46.3 |
| Compound 10b      | 76.8     | 72.4     | 72.4     | 58.4 | 94.4  | 75.2 | 59.2 | 47.3 |
| Compound 11a      | 35.5     | 28.9     | 29.1     | 17.4 | 77.9  | 55.3 | 70.2 | 19.9 |
| Compound 11b      | 37.9     | 34       | 32.3     | 15.4 | 79.7  | 52.3 | 66.2 | 20.9 |

**Supplementary Table 1d:** High confidence Bayesian predictions for compounds 1 and 12 to 29r

| Compound Name     | 5-HT1a | 5-HT1b | 5-HT1d | 5-HT1e | 5-HT2a | 5-HT2b | 5-HT2c | 5-HT3 | 5-HT4 | 5-HT5a | 5-HT6 | 5-HT7 |
|-------------------|--------|--------|--------|--------|--------|--------|--------|-------|-------|--------|-------|-------|
| Donepezil (Cpd 1) | -12.5  | -11.1  | -13.2  | -4.1   | -1.4   | -0.9   | -2.3   | -2.2  | -10.4 | -10.6  | -15.6 | -6.9  |
| Compound 12       | 14.1   | 0.4    | -1.4   | -3.2   | 19.6   | 6.8    | 8.7    | 5.1   | -25.4 | -4.8   | -15.4 | 27    |
| Compound 13       | -9.8   | -9.5   | -7     | -4.1   | 2.4    | 3.4    | -1.5   | -3.1  | -27.6 | -8.5   | -22.4 | 2.1   |
| Compound 14r      | -1.9   | -14.2  | -13.5  | -2.4   | -8.6   | -4     | -5.6   | -5.7  | -14.9 | -13.7  | -29.4 | 2.3   |
| Compound 15r      | 14.7   | 3      | -5.9   | -3.5   | 13.4   | 10.9   | 20     | -2.1  | -13.7 | -7.6   | -17.9 | 11.6  |
| Compound 16r      | -13.1  | -14.7  | -14.8  | -3     | -9.8   | -3.9   | -7.2   | -2    | -16.1 | -16.2  | -29   | 5.4   |
| Compound 17r      | 3.5    | 2.5    | -7.2   | -4.1   | 12.1   | 11.1   | 18.5   | 1.6   | -14.9 | -10    | -17.5 | 14.7  |
| Compound 18s      | -12.9  | -12.9  | -14.2  | -2.5   | -8.7   | -9.6   | -6.4   | -6.6  | -16.8 | 5      | -26.3 | 5.2   |
| Compound 19s      | 3.7    | 4.3    | -6.6   | -3.5   | 13.3   | 5.4    | 19.3   | -3    | -15.6 | 11.1   | -14.8 | 14.6  |
| Compound 20r      | -23.8  | -18.9  | -18.6  | -2.8   | -16.7  | -8     | -14.5  | -7.9  | -25.3 | -13.8  | -40.1 | -5.6  |
| Compound 20s      | -23.8  | -18.9  | -18.6  | -2.8   | -16.7  | -8     | -14.5  | -7.9  | -25.3 | -13.8  | -40.1 | -5.6  |
| Compound 21r      | -7.2   | -1.7   | -11    | -3.8   | 5.3    | 7      | 11.2   | -4.3  | -24   | -7.6   | -28.7 | 3.7   |
| Compound 21s      | -7.2   | -1.7   | -11    | -3.8   | 5.3    | 7      | 11.2   | -4.3  | -24   | -7.6   | -28.7 | 3.7   |
| Compound 22r      | -3.8   | -13.3  | -13.3  | -2.3   | -4     | -5.7   | -6.1   | -2.4  | -10.4 | -1.9   | -21.4 | 3.7   |
| Compound 22s      | -3.8   | -13.3  | -13.3  | -2.3   | -4     | -5.7   | -6.1   | -2.4  | -10.4 | -1.9   | -21.4 | 3.7   |
| Compound 23r      | 12.7   | 3.9    | -5.7   | -3.3   | 17.9   | 9.2    | 19.6   | 1.2   | -9.1  | 4.2    | -9.9  | 13.1  |
| Compound 23s      | 12.7   | 3.9    | -5.7   | -3.3   | 17.9   | 9.2    | 19.6   | 1.2   | -9.1  | 4.2    | -9.9  | 13.1  |
| Compound 24s      | -6.8   | -13.4  | -15.3  | -2.9   | -10.3  | -8.9   | -9.1   | -6.4  | -11.2 | 0.9    | -22.2 | 6.3   |
| Compound 25r      | 9.7    | 3.8    | -7.7   | -4     | 11.6   | 6      | 16.6   | -2.8  | -9.9  | 7.1    | -10.8 | 15.6  |
| Compound 25s      | 9.7    | 3.8    | -7.7   | -4     | 11.6   | 6      | 16.6   | -2.8  | -9.9  | 7.1    | -10.8 | 15.6  |
| Compound 26r      | 1.7    | 1      | -11.7  | -4.8   | 11.5   | 13.4   | 18.2   | 1.9   | -14.7 | -9.4   | -16.3 | 13.8  |
| Compound 26s      | 1.7    | 1      | -11.7  | -4.8   | 11.5   | 13.4   | 18.2   | 1.9   | -14.7 | -9.4   | -16.3 | 13.8  |
| Compound 27r      | -3.8   | -0.4   | -10.3  | -3.7   | 8.2    | 8.5    | 13.9   | 0.3   | -10.9 | -4.6   | -19.3 | 8.9   |
| Compound 27s      | -3.8   | -0.4   | -10.3  | -3.7   | 8.2    | 8.5    | 13.9   | 0.3   | -10.9 | -4.6   | -19.3 | 8.9   |
| Compound 28r      | -5.2   | -1.1   | -9.5   | -4.9   | 8.3    | 8.7    | 15.4   | -1.2  | -15.7 | -5.6   | -17.7 | 9.4   |
| Compound 28s      | -5.2   | -1.1   | -9.5   | -4.9   | 8.3    | 8.7    | 15.4   | -1.2  | -15.7 | -5.6   | -17.7 | 9.4   |
| Compound 29r      | 0      | 0.8    | -9.7   | -4.6   | 8.9    | 10.1   | 16.2   | 0.4   | -16.9 | -10.4  | -18.9 | 11.8  |

| Compound Name     | Alpha-1a | Alpha-1b | Alpha-1d | D1   | D2   | D3   | D4    | D5   |
|-------------------|----------|----------|----------|------|------|------|-------|------|
| Donepezil (Cpd 1) | -5.7     | -10.7    | -8.5     | 6.8  | 9    | 22.7 | 26.3  | -3.6 |
| Compound 12       | 7.8      | 10.5     | 9.5      | 18.7 | 72.6 | 20.6 | 111.1 | 19.2 |
| Compound 13       | -18.8    | -15.8    | -19.5    | 6.3  | 67.7 | 10.3 | 112.1 | 3.1  |
| Compound 14r      | -11.7    | -9.7     | -11.1    | -1.3 | 27.9 | -1.8 | 84    | 13.3 |
| Compound 15r      | 8.3      | 6.7      | 7.2      | 14   | 16.3 | 14.2 | 61.3  | 18.9 |
| Compound 16r      | -11.9    | -11.4    | -11.6    | 0.4  | 22.3 | -3.2 | 82.6  | 12.2 |
| Compound 17r      | 8        | 5        | 6.8      | 15.6 | 10.7 | 12.7 | 59.9  | 17.8 |
| Compound 18s      | -21.6    | -17.8    | -20.2    | 1.5  | 29.5 | 0.6  | 88.8  | 20.4 |
| Compound 19s      | -1.7     | -1.5     | -1.8     | 16.8 | 17.9 | 16.6 | 66.1  | 26   |
| Compound 20r      | -24.1    | -20.5    | -22.8    | -7.7 | 14.6 | -9.7 | 77.2  | 10   |
| Compound 20s      | -24.1    | -20.5    | -22.8    | -7.7 | 14.6 | -9.7 | 77.2  | 10   |
| Compound 21r      | -4.1     | -4.1     | -4.4     | 7.6  | 3    | 6.2  | 54.5  | 15.6 |
| Compound 21s      | -4.1     | -4.1     | -4.4     | 7.6  | 3    | 6.2  | 54.5  | 15.6 |
| Compound 22r      | -17.3    | -16.6    | -17.9    | 1.4  | 32.2 | 2.5  | 89.7  | 23.6 |
| Compound 22s      | -17.3    | -16.6    | -17.9    | 1.4  | 32.2 | 2.5  | 89.7  | 23.6 |
| Compound 23r      | 2.7      | -0.3     | 0.4      | 16.7 | 20.6 | 18.5 | 67    | 29.1 |
| Compound 23s      | 2.7      | -0.3     | 0.4      | 16.7 | 20.6 | 18.5 | 67    | 29.1 |
| Compound 24s      | -19.3    | -16.3    | -18.7    | -1.7 | 25   | -0.4 | 86.2  | 26   |
| Compound 25r      | 0.6      | 0        | -0.4     | 13.6 | 13.4 | 15.5 | 63.5  | 31.6 |
| Compound 25s      | 0.6      | 0        | -0.4     | 13.6 | 13.4 | 15.5 | 63.5  | 31.6 |
| Compound 26r      | 11.8     | 10.6     | 11       | 16.8 | 11.6 | 15.8 | 74.8  | 18.7 |
| Compound 26s      | 11.8     | 10.6     | 11       | 16.8 | 11.6 | 15.8 | 74.8  | 18.7 |
| Compound 27r      | -1.5     | -2.8     | -2.7     | 16   | 6.1  | 10.9 | 58.1  | 23   |
| Compound 27s      | -1.5     | -2.8     | -2.7     | 16   | 6.1  | 10.9 | 58.1  | 23   |
| Compound 28r      | -1       | -0.8     | -0.8     | 12.1 | 3    | 8.5  | 55.6  | 19.8 |
| Compound 28s      | -1       | -0.8     | -0.8     | 12.1 | 3    | 8.5  | 55.6  | 19.8 |
| Compound 29r      | 5.9      | 3.2      | 4.4      | 16.4 | 9.6  | 13.7 | 57.7  | 18.2 |

**Supplementary Table 2:** Experimental radioligand percentage inhibition

| Compound Name     | 5-HT1A | 5-HT1B | 5-HT1D | 5-HT1E | 5-HT2A | 5-HT2B | 5-HT2C | 5-HT3 | 5-HT4 | 5-HT5A | 5-HT6 | 5-HT7 |
|-------------------|--------|--------|--------|--------|--------|--------|--------|-------|-------|--------|-------|-------|
| Donepezil (Cpd 1) | 19.1   | -3.2   | 27.3   | 0.4    | 29.7   | 67.6   | -2.2   | 10.7  | 3.7   | 17.3   | 15.1  | 35.9  |
| Compound 2        | 92.5   | 72.3   | 76.3   | 6.8    | 73     | 95.3   | 65.6   | -3.4  | 6.9   | 64.5   | -11.3 | 88.4  |
| Compound 3        | 93.3   | 89.9   | 87.6   | 16.5   | 90.3   | 95.6   | 91.3   | 10.4  | 4.4   | 61.4   | 11.3  | 91.8  |
| Compound 4        | 92.4   | 83     | 93.8   | -1.5   | 38.4   | 93.9   | 74.3   | -19.5 | 11.8  | 65.8   | -15.8 | 5.3   |
| Compound 5        | 98.3   | 42.5   | 79     | 3.5    | 77.9   | 96.6   | 58.5   | 7.9   | 10.7  | 60     | 6     | 84.8  |
| Compound 6        | 99.2   | 98.5   | 98.5   | 17.2   | 92.6   | 95.1   | 91.9   | 77.2  | 12.6  | 72.2   | 66.1  | 90    |
| Compound 7        | 97.7   | 98.7   | 98.6   | 66.7   | 97.4   | 95.4   | 86     | 67.8  | 14.6  | 77.6   | 93.8  | 95.9  |
| Compound 8        | 98.2   | 99     | 97.3   | 63.6   | 96.7   | 96.6   | 95.9   | 77.2  | 20.6  | 84.9   | 94.5  | 93.3  |
| Compound 9a       | 99.5   | 94.4   | 96.9   | 64.5   | 98.7   | 95.3   | 93.8   | 99.5  | 24.3  | 89.9   | 89.8  | 100   |
| Compound 9b       | 99     | 96     | 97.5   | 65.1   | 101    | 85.3   | 95.5   | 95.7  | 11.2  | 87.8   | 87.6  | 101.2 |
| Compound 10a      | 100.7  | 84.2   | 88     | -14.7  | 91.5   | 95.6   | 77.2   | 27.1  | 9.7   | 72     | 14.8  | 98.2  |
| Compound 10b      | 97.9   | 86.1   | 91.5   | -11.4  | 93.5   | 85.2   | 77.1   | 18.2  | -2    | 72.8   | 22.8  | 99.1  |
| Compound 11a      | 100.9  | 60.1   | 68.9   | -6.5   | 95.2   | 88.4   | 63     | 36.6  | 10.7  | 49.6   | 3.6   | 93.3  |
| Compound 11b      | 99     | 45.8   | 77     | -8.6   | 89.2   | 83.3   | 42.6   | 19.4  | 13.2  | 58.8   | 18.9  | 98.4  |
| Compound 12       | 56.5   | -2.1   | 8.7    | -2.8   | 34.5   | 80     | 10.5   | -0.3  | 0.2   | 12.7   | 6.1   | 58    |
| Compound 13       | 55.8   | 6.6    | 63     | -6.5   | 42.9   | 80     | 0.3    | 72.4  | 29.4  | 12.9   | 23.4  | 67.9  |
| Compound 14r      | 76.4   | -14.1  | 1.2    | -4.6   | 18.8   | 27.5   | 28.7   | -7    | -16.8 | -19.1  | -19.2 | -15.6 |
| Compound 15r      | 51.7   | 9.2    | 20.2   | -35.2  | 47.5   | 75.6   | 15.5   | 24    | -2.4  | 24.4   | 27.2  | 28.1  |
| Compound 16r      | 74.9   | 1.9    | -0.3   | -8.9   | -1.1   | 36.1   | 20.3   | -10.9 | -0.2  | -29    | -17.5 | -18.9 |
| Compound 17r      | 27.5   | -1.1   | 22.9   | -13.1  | 41.9   | 84.6   | 10.5   | 20.9  | 45    | -11.6  | 12.3  | 45.6  |
| Compound 18s      | 47.6   | 36.4   | 10.2   | -4.9   | -11.3  | 74.4   | 42.6   | 9.9   | 8.3   | 40.5   | 26.7  | 10.4  |
| Compound 19s      | 79     | 43.5   | 76.8   | -13.8  | 73.7   | 70.5   | 70.5   | 8.4   | 10.6  | 11.2   | 24.2  | 74.4  |
| Compound 20r      | 30.4   | 14     | -5.2   | -5     | 73.3   | 54     | 44.2   | 6.9   | 3.6   | 25.8   | 21.4  | 1     |
| Compound 20s      | 21.7   | 10.8   | -6.8   | -4.4   | -7     | 58.8   | 36.4   | 2.6   | 10.6  | 23     | 16.6  | -1.2  |
| Compound 21r      | 24.1   | -5.9   | 46.9   | -9     | 66     | 41.2   | 24.2   | -16   | 5.6   | -20.7  | 8.1   | 45.3  |
| Compound 21s      | 55.3   | 33.7   | 22.4   | -10.6  | 61.8   | 23.4   | 40.8   | 3.2   | 8.8   | 3.2    | -10.6 | 17.7  |
| Compound 22r      | 89.3   | 10.7   | 20.9   | 4.5    | 62.8   | 74.6   | 48     | 14.8  | 7.6   | 28.9   | 26.7  | -4    |
| Compound 22s      | 72.9   | 51.8   | 18.9   | -16.3  | 60     | 88.8   | 47.2   | 8.3   | 15    | 2      | 17.3  | 21.7  |
| Compound 23r      | 57.5   | 24.7   | 33.2   | -15.8  | 60.8   | 88     | 13.6   | -3.7  | 27.8  | 6.1    | 9.2   | 43.8  |
| Compound 23s      | 83     | 32.6   | 74     | -16.4  | 78     | 88.3   | 79.1   | 8.4   | 11.7  | 5.5    | 29    | 25.9  |
| Compound 24s      | 91.3   | 50.9   | 17.2   | -11.4  | 52.1   | 80.8   | 34     | 18.6  | 10.9  | 14.6   | 8.9   | 13.5  |
| Compound 25r      | 65     | 30.2   | 25.9   | -15.1  | 69.1   | 76.2   | 3.1    | -6.8  | 10.3  | -8.5   | 11.6  | 45.8  |
| Compound 25s      | 80.6   | 31.6   | 55.6   | -10.8  | 78     | 87.4   | 78.1   | 12.2  | 13.4  | -9.8   | 19.4  | 22.6  |
| Compound 26r      | 26.5   | 5.9    | 23.4   | -20    | 33.6   | 50.9   | 2.1    | -12.7 | 20.3  | -14.1  | 10.7  | 64.2  |
| Compound 26s      | 22.3   | 8      | 33.2   | -13.2  | 33.9   | 28.1   | 1.7    | -15.2 | 28.8  | -13    | 7.6   | 39.2  |
| Compound 27r      | 13.6   | -4.5   | 35.4   | -12.3  | 37.8   | 60.5   | -14.6  | -9.7  | 26    | -16.6  | 8.5   | 42.4  |
| Compound 27s      | 22.4   | 4.6    | 45.3   | -8.6   | 39.9   | 36.1   | 4.4    | 3.6   | 24.4  | 16.1   | 10.6  | 7.6   |
| Compound 28r      | 49     | -0.6   | 33.8   | -11.7  | 72.1   | 23.3   | 1.6    | -15   | 13.1  | -9.3   | 10.9  | 48.2  |
| Compound 28s      | 30.3   | 6.2    | 37.1   | -11.3  | 27.8   | 27.9   | 7.1    | -0.4  | 2.4   | -18.8  | 8.5   | 23.5  |
| Compound 29r      | 36.3   | -7.6   | 34.5   | -10    | 53.9   | 61.2   | 1.5    | -12.9 | 48.6  | -16.4  | 3     | 42.1  |

| Compound Name     | Alpha-1A | Alpha-1B | Alpha-1D | D1   | D2    | D3    | D4    | D5   |
|-------------------|----------|----------|----------|------|-------|-------|-------|------|
| Donepezil (Cpd 1) | 77.2     | 29.8     | 90.1     | 13.3 | 18.6  | 55.7  | 89.2  | 8.7  |
| Compound 2        | 102.2    | 102.5    | 99.3     | 49.5 | 85    | 94.1  | 99.6  | 31.8 |
| Compound 3        | 102.7    | 101.5    | 96.8     | 91.3 | 96.2  | 100.5 | 91.6  | 75.1 |
| Compound 4        | 101.2    | 104.4    | 97.3     | 29.3 | 66.6  | 98.1  | 97.2  | 21.8 |
| Compound 5        | 99.1     | 52.4     | 100.5    | 54.5 | 82.1  | 94.7  | 97.3  | 32.5 |
| Compound 6        | 102.8    | 104.1    | 98.5     | 45.8 | 84.6  | 98.4  | 97.6  | 28.7 |
| Compound 7        | 101      | 101.3    | 99       | 85.1 | 93.6  | 102.8 | 89.6  | 29.4 |
| Compound 8        | 99.7     | 102.1    | 92.1     | 81.9 | 95.5  | 101.1 | 99.1  | 47.2 |
| Compound 9a       | 100.6    | 95.9     | 104.4    | 99.8 | 99.3  | 99.7  | 100.4 | 76.6 |
| Compound 9b       | 102.4    | 89.6     | 102.8    | 89.8 | 99    | 99.7  | 101.1 | 73.3 |
| Compound 10a      | 103.6    | 96.4     | 105      | 74   | 97.5  | 99.2  | 100   | 57.1 |
| Compound 10b      | 102.1    | 97.6     | 104.7    | 43.6 | 96.9  | 98.6  | 100.2 | 42.6 |
| Compound 11a      | 97.1     | 63.8     | 92.4     | 53.9 | 86.6  | 98    | 100.1 | 31.5 |
| Compound 11b      | 93.8     | 63.6     | 90.3     | 74.4 | 93    | 99.1  | 100.4 | 36.7 |
| Compound 12       | 64.8     | -19.8    | 31.1     | -1   | 2     | 51    | 6.9   | 18   |
| Compound 13       | 55.5     | 30.6     | 23.4     | 35.1 | 69    | 59.7  | 99.4  | 8.1  |
| Compound 14r      | 8.1      | 24.9     | 24.3     | 47.9 | -15.6 | 4.5   | 0.4   | 38.5 |
| Compound 15r      | 16.5     | 16.7     | 10.5     | 29.9 | 32.1  | 85.6  | 72.4  | 42.4 |
| Compound 16r      | -1.3     | 31       | 28       | 63.7 | -7.3  | 2.5   | 44.1  | 16.1 |
| Compound 17r      | 14.9     | 8        | 12.1     | 56.4 | 0.3   | 0.2   | 81.1  | 23.7 |
| Compound 18s      | 38.4     | 21.6     | 12.5     | 21.3 | 13.6  | 17.5  | 58.5  | 3.6  |
| Compound 19s      | 92.7     | 63.3     | 78.9     | 83   | 92.8  | 72.7  | 103   | 48.2 |
| Compound 20r      | 23       | -2.2     | -8.3     | 9.8  | 5.5   | 27.6  | 38.9  | -6.4 |
| Compound 20s      | 22.3     | -3.7     | -0.5     | 2.5  | 9.9   | 11.7  | 28.1  | -7.2 |
| Compound 21r      | -2.1     | 4.2      | -11.9    | 52.4 | 36.3  | 26.7  | 61.8  | 12.7 |
| Compound 21s      | 33.1     | 23.2     | -0.2     | 18.7 | 20.9  | 26.9  | 102.4 | 5.5  |
| Compound 22r      | 39.1     | 25.7     | 22.1     | 23   | 23.7  | 27.3  | 96.6  | 7.1  |
| Compound 22s      | 24.5     | 25.1     | 46.1     | 43.2 | 15.1  | 18.9  | 72.9  | 5.6  |
| Compound 23r      | 25.4     | 31.7     | -0.6     | 31   | 63.1  | 40.4  | 89.9  | -4.8 |
| Compound 23s      | 84.5     | 52.1     | 68.8     | 72.5 | 62.7  | 52    | 103.6 | 22.7 |
| Compound 24s      | 14.1     | 48.9     | 18.2     | 26.3 | 9.5   | 15    | 41.9  | -6.2 |
| Compound 25r      | 18.6     | 19.4     | -5.4     | 37.6 | 31.5  | 0.3   | 79.6  | 24.9 |
| Compound 25s      | 68       | 42.4     | 54.4     | 48.7 | 36.5  | 48.2  | 101.5 | 6.1  |
| Compound 26r      | 7.9      | 10.8     | -13.5    | 44   | 26.5  | 50    | 45.4  | 17.1 |
| Compound 26s      | 31.1     | 44.8     | 32.5     | 41.3 | 15.2  | 11.7  | 92.7  | 7.7  |
| Compound 27r      | 13.5     | 5.2      | 2.6      | 44.1 | 37.8  | 1.3   | 66.2  | 10.2 |
| Compound 27s      | 42.4     | 43.3     | 36.5     | 93.6 | 60    | -8.3  | 97.3  | 33.7 |
| Compound 28r      | 9        | 4.9      | 14.3     | 13.3 | 16.2  | 37.7  | 43    | 3.5  |
| Compound 28s      | 25.7     | 39.1     | 16.5     | 44.1 | 18.8  | 34.5  | 94.2  | -2.7 |
| Compound 29r      | -18.9    | 25.3     | -1.3     | 33.9 | 6.1   | 4.7   | 54.6  | 27.1 |



**Supplementary Table 3:** Experimental competition binding affinity

| Compound Name     | 5-HT1A        | 5-HT1B | 5-HT1D  | 5-HT1E | 5-HT2A  | 5-HT2B | 5-HT2C  | 5-HT3 | 5-HT4 | 5-HT5A | 5-HT6 | 5-HT7   |
|-------------------|---------------|--------|---------|--------|---------|--------|---------|-------|-------|--------|-------|---------|
| Donepezil (cpd 1) | >10,000       |        |         |        |         | 6761   |         |       |       |        |       |         |
| Compound 2        | 6.5           | 362    | 1002    |        | 956     | 19     | >10,000 |       |       | 2903   |       | 545     |
| Compound 3        | 23            | 130    | 298     |        | 270     | 41     | 3428    |       |       | 2437   |       | 228     |
| Compound 4        | 3.5           | 306    | 139     |        |         | 160    | >10,000 |       |       | 2154   |       |         |
| Compound 5        | 19            |        | 829     |        | 1004    | 117    | >10,000 |       |       | 2471   |       | 732     |
| Compound 6        | 2.3           | 33     | 59      |        | 387     | 12     | 1450    | 767   |       | 1982   | 2192  | 181     |
| Compound 7        | 62            | 41     | 80      | 3339   | 65      | 10     | 543     | 1794  |       | 2367   | 417   | 164     |
| Compound 8        | 20            | 27     | 130     | 3683   | 76      | 1      | 217     | 2406  |       | 1056   | 430   | 75      |
| Compound 9a       | 1.5(AVE)      | 73     | >10,000 | 3448   | 39      | 1.8    | 354     | 99    |       | 773    | 544   | 21      |
| Compound 9b       | 1.3(AVE)      | 73     | >10,000 | 4367   | 24      | 0.6    | 317     | 677   |       | 809    | 669   | 20      |
| Compound 10a      | 0.9(AVE)      | 217    | >10,000 |        | 583     | 40     | 9253    |       |       | 1053   |       | 77      |
| Compound 10b      | 0.7(AVE)      | 232    | >10,000 |        | 755     | 12     | >10,000 |       |       | 1131   |       | 31      |
| Compound 11a      | 4.0(AVE)      | 834    | >10,000 |        | 384     | 192    | >10,000 |       |       |        |       | 150     |
| Compound 11b      | 1.2           |        | 2112    |        | 645     | 121    |         |       |       | 3082   |       | 26      |
| Compound 12       | 8430          |        |         |        |         | 1454   |         |       |       |        |       | 2824    |
| Compound 13       | 1488          |        |         |        |         | 846.7  |         | 3350  |       |        |       | 4037    |
| Compound 14r      | 7324          |        |         |        |         |        |         |       |       |        |       |         |
| Compound 15r      | 2883          |        |         |        |         | 599.7  |         |       |       |        |       |         |
| Compound 16r      | 2298          |        |         |        |         |        |         |       |       |        |       |         |
| Compound 17r      |               |        |         |        |         | 788    |         |       |       |        |       |         |
| Compound 18s      |               |        |         |        |         | 6416   |         |       |       |        |       |         |
| Compound 19s      | 0.6           |        | 590     |        | 817     | 1445   | 6736    |       |       |        |       | 467.5   |
| Compound 20r      |               |        |         |        | 2663    | 8808   |         |       |       |        |       |         |
| Compound 20s      |               |        |         |        |         | 7641   |         |       |       |        |       |         |
| Compound 21r      |               |        |         |        | 3584    |        |         |       |       |        |       |         |
| Compound 21s      | 10,000.0(AVE) |        |         |        | 3545    |        |         |       |       |        |       |         |
| Compound 22r      | 384           |        |         |        | 2066    | 2358   |         |       |       |        |       |         |
| Compound 22s      | 1388          | 7765   |         |        | 2718    | 1096   |         |       |       |        |       |         |
| Compound 23r      | 1848          |        |         |        | 2671    | 1846   |         |       |       |        |       |         |
| Compound 23s      | 545           |        | 1121    |        | 1275    | 551    | 3386    |       |       |        |       |         |
| Compound 24s      | 371           | 4827   |         |        | 1945    | 1654   |         |       |       |        |       |         |
| Compound 25r      | 1469          |        |         |        | 3779    | 2692   |         |       |       |        |       |         |
| Compound 25s      | 174           |        | 1976    |        | 1399    | 658    | 3763    |       |       |        |       |         |
| Compound 26r      |               |        |         |        |         | 3169   |         |       |       |        |       | >10,000 |
| Compound 26s      |               |        |         |        |         |        |         |       |       |        |       |         |
| Compound 27r      |               |        |         |        |         | 2561   |         |       |       |        |       |         |
| Compound 27s      |               |        |         |        |         |        |         |       |       |        |       |         |
| Compound 28r      |               |        |         |        | 1482    |        |         |       |       |        |       |         |
| Compound 28s      |               |        |         |        |         |        |         |       |       |        |       |         |
| Compound 29r      |               |        |         |        | >10,000 | 1326   |         |       |       |        |       |         |

AVE = Average value from at least two experiments, and curation from experts

| Compound Name     | Alpha-1A | Alpha-1B | Alpha-1D  | D1           | D2            | D3           | D4           | D5           |
|-------------------|----------|----------|-----------|--------------|---------------|--------------|--------------|--------------|
| Donepezil (cpd 1) | 1463     |          | 1918      |              |               | >10,000      | 614          |              |
| Compound 2        | 64.9     | 322.8    | 81.1      | 6220         | 1,503.0(AVE)  | 389.0(AVE)   | 8.4(AVE)     | 8285         |
| Compound 3        | 0.9      | 19.3     | 4.4       | 531          | 156           | 11           | 436          | 1886         |
| Compound 4        | 15.9     | 38.7     | 12.4(AVE) |              | 1651          | 208          | 191          |              |
| Compound 5        | 59.9     | 608.1    | 56        | 2734         | 1367          | 152          | 115          |              |
| Compound 6        | 35.8     | 152.5    | 72.2(AVE) |              | 1112          | 56           | 264          |              |
| Compound 7        | 75.5     | 91       | 49.6      | 1406         | 585           | 32           | 925          |              |
| Compound 8        | 257.5    | 3577     | 212.8     | 1,131.3(AVE) | 871.5(AVE)    | 79.5(AVE)    | 20.5(AVE)    | >10,000      |
| Compound 9a       | 117.2    | 649      | 78.4      | 511          | 14            | 1            | 13           | 2385         |
| Compound 9b       | 216.8    | 656.7    | 209.6     | 500          | 5.8           | 1            | 9            | 3577         |
| Compound 10a      | 11.1     | 76.6     | 14.2      | 1618         | 25            | 4            | 6            | 6865         |
| Compound 10b      | 7.2      | 125.3    | 37.6      |              | 9.3(AVE)      | 0.7          | 3.1(AVE)     |              |
| Compound 11a      | 555.4    | 1375     | 467.3     | 1,658.0(AVE) | 805.5(AVE)    | 41.5(AVE)    | 14.5(AVE)    | 9,359.0(AVE) |
| Compound 11b      | 866.6    | 2542     | 979.6     | 1257         | 209.4(AVE)    | 3            | 6.5(AVE)     | >10,000      |
| Compound 12       | 2010     |          |           |              |               | >10,000      |              |              |
| Compound 13       | 7695     |          |           |              | >10,000       | 6895         | 8.9          |              |
| Compound 14r      |          |          |           |              |               |              |              |              |
| Compound 15r      |          |          |           |              |               | >10,000      | 814.0(AVE)   |              |
| Compound 16r      |          |          |           | >10,000      |               |              |              |              |
| Compound 17r      |          |          |           | >10,000      |               |              | 1931         |              |
| Compound 18s      |          |          |           |              |               |              | 5526         |              |
| Compound 19s      | 2720     | 7211.1   | 2307      | 1353         | 342           | 2827         | 132          |              |
| Compound 20r      |          |          |           |              |               |              |              |              |
| Compound 20s      |          |          |           |              |               |              |              |              |
| Compound 21r      |          |          |           | >10,000      |               |              | 2406         |              |
| Compound 21s      |          |          |           | >10,000      | >10,000       | 8,359.0(AVE) | 182.0(AVE)   | >10,000      |
| Compound 22r      |          |          |           |              |               |              | 536          |              |
| Compound 22s      |          |          |           |              |               |              | 2858         |              |
| Compound 23r      |          |          |           |              | >10,000       |              | 1666         |              |
| Compound 23s      | 9037     | 6637.4   | 4181      | 2041         | 1892          | 6645         | 146          |              |
| Compound 24s      |          |          |           |              |               |              |              |              |
| Compound 25r      |          |          |           |              |               |              | 2486         |              |
| Compound 25s      | 8350     |          | 6448      | 8,366.0(AVE) | 10,000.0(AVE) | 8,285.5(AVE) | 3,361.7(AVE) | 8,525.5(AVE) |
| Compound 26r      |          |          |           |              |               | >10,000      |              |              |
| Compound 26s      |          |          |           |              |               |              | 434.7        |              |
| Compound 27r      |          |          |           |              |               |              | 3618         |              |
| Compound 27s      |          |          |           | 5852         | >10,000       |              | 90.0(AVE)    |              |
| Compound 28r      |          |          |           |              |               |              |              |              |
| Compound 28s      |          |          |           |              |               |              | 502.9        |              |
| Compound 29r      |          |          |           |              |               |              | 4947         |              |

AVE = Average value from at least two experiments, and curation from experts

Supplementary Table 4: Optimisation results for D2/CNS objectives

| Structure                                                                                          | Desirability<br>Synthesis | Complexity<br>Score | Fragment<br>Score | Pareto<br>Front | ADME Score | Dopamine D2 | Distance<br>(D2 to 100,<br>ADME to 50) | Top 5 predictions                                                                                                                                                     |
|----------------------------------------------------------------------------------------------------|---------------------------|---------------------|-------------------|-----------------|------------|-------------|----------------------------------------|-----------------------------------------------------------------------------------------------------------------------------------------------------------------------|
| 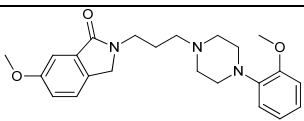<br>Compound 2    | 0.794                     | 1.24                | 1.94              | 2               | 50         | 92          | 8                                      | Serotonin 1a (5-HT1a) receptor 93<br>Dopamine D2 receptor 82<br>Serotonin 7 (5-HT7) receptor 70<br>Alpha-1a adrenergic receptor 69<br>Dopamine D3 receptor 66         |
| <br>Compound 3    | 0.792                     | 1.26                | 1.90              | 1               | 54         | 92          | 9                                      | Serotonin 1a (5-HT1a) receptor 82<br>Dopamine D2 receptor 80<br>Alpha-1a adrenergic receptor 79<br>Dopamine D3 receptor 78<br>Alpha-1d adrenergic receptor 74         |
| <br>Compound 4    | 0.742                     | 1.76                | 1.50              | 3               | 48         | 90          | 10                                     | Serotonin 1a (5-HT1a) receptor 95<br>Dopamine D2 receptor 78<br>Alpha-1a adrenergic receptor 71<br>Alpha-1b adrenergic receptor 66<br>Alpha-1d adrenergic receptor 66 |
| <br>Compound 5    | 0.793                     | 1.24                | 1.91              | 2               | 51         | 89          | 11                                     | Serotonin 1a (5-HT1a) receptor 88<br>Dopamine D2 receptor 80<br>Alpha-1a adrenergic receptor 70<br>Alpha-1d adrenergic receptor 69<br>Dopamine D3 receptor 65         |
| <br>Compound 6    | 0.743                     | 1.76                | 1.50              | 3               | 48         | 89          | 11                                     | Serotonin 1a (5-HT1a) receptor 94<br>Dopamine D2 receptor 78<br>Alpha-1a adrenergic receptor 71<br>Alpha-1b adrenergic receptor 67<br>Alpha-1d adrenergic receptor 66 |
| <br>Compound 7    | 0.791                     | 1.26                | 1.90              | 2               | 52         | 88          | 12                                     | Alpha-1a adrenergic receptor 84<br>Alpha-1d adrenergic receptor 80<br>Serotonin 1a (5-HT1a) receptor 79<br>Dopamine D2 receptor 77<br>Alpha-1b adrenergic receptor 70 |
| <br>Compound 8   | 0.741                     | 1.75                | 1.46              | 3               | 50         | 88          | 12                                     | Serotonin 1a (5-HT1a) receptor 89<br>Dopamine D2 receptor 77<br>Alpha-1a adrenergic receptor 72<br>Alpha-1d adrenergic receptor 70<br>Alpha-1b adrenergic receptor 67 |
| <br>Compound 9  | 0.786                     | 1.26                | 1.80              | 4               | 48         | 88          | 13                                     | Serotonin 1a (5-HT1a) receptor 73<br>Dopamine D2 receptor 73<br>Alpha-1a adrenergic receptor 72<br>Dopamine D3 receptor 69<br>Serotonin 7 (5-HT7) receptor 68         |
| <br>Compound 10 | 0.787                     | 1.26                | 1.82              | 1               | 56         | 89          | 13                                     | Dopamine D3 receptor 80<br>Alpha-1a adrenergic receptor 79<br>Dopamine D2 receptor 79<br>Alpha-1d adrenergic receptor 75<br>Serotonin 1a (5-HT1a) receptor 73         |
| <br>Compound 11 | 0.789                     | 1.25                | 1.84              | 2               | 52         | 87          | 13                                     | Serotonin 1a (5-HT1a) receptor 84<br>Dopamine D2 receptor 74<br>Serotonin 7 (5-HT7) receptor 71<br>Alpha-1a adrenergic receptor 62<br>Alpha-1d adrenergic receptor 58 |

| Structure                                                                                       | Desirability<br>Synthesis | Complexity<br>Score | Fragment<br>Score | Pareto<br>Front | ADME Score | Dopamine D2 | Distance<br>(D2 to 100,<br>ADME to 50) | Top 5 predictions                                                                                                                                                     |
|-------------------------------------------------------------------------------------------------|---------------------------|---------------------|-------------------|-----------------|------------|-------------|----------------------------------------|-----------------------------------------------------------------------------------------------------------------------------------------------------------------------|
| 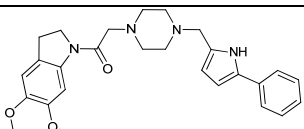               | 0.755                     | 1.27                | 1.23              | 4               | 43         | 89          | 13                                     | Dopamine D2 receptor 80<br>Dopamine D4 receptor 66<br>Cytochrome P450 1A2 26<br>Dopamine D3 receptor 24<br>Muscarinic acetylcholine receptor M4 19                    |
|                | 0.741                     | 1.75                | 1.46              | 3               | 50         | 87          | 13                                     | Serotonin 1a (5-HT1a) receptor 89<br>Dopamine D2 receptor 76<br>Alpha-1a adrenergic receptor 72<br>Alpha-1d adrenergic receptor 70<br>Alpha-1b adrenergic receptor 67 |
|                | 0.790                     | 1.26                | 1.88              | 2               | 54         | 87          | 14                                     | Alpha-1a adrenergic receptor 86<br>Alpha-1d adrenergic receptor 84<br>Dopamine D2 receptor 77<br>Serotonin 1a (5-HT1a) receptor 74<br>Alpha-1b adrenergic receptor 70 |
| <br>Compound 5 | 0.795                     | 1.24                | 1.96              | 3               | 50         | 86          | 14                                     | Serotonin 1a (5-HT1a) receptor 89<br>Dopamine D2 receptor 76<br>Serotonin 7 (5-HT7) receptor 69<br>Alpha-1a adrenergic receptor 68<br>Dopamine D3 receptor 67         |
|                | 0.782                     | 1.25                | 1.72              | 2               | 55         | 87          | 14                                     | Serotonin 1a (5-HT1a) receptor 79<br>Alpha-1a adrenergic receptor 79<br>Dopamine D3 receptor 77<br>Dopamine D2 receptor 76<br>Alpha-1d adrenergic receptor 75         |
|                | 0.792                     | 1.26                | 1.91              | 4               | 41         | 90          | 14                                     | Alpha-1a adrenergic receptor 80<br>Serotonin 1a (5-HT1a) receptor 80<br>Dopamine D2 receptor 79<br>Alpha-1d adrenergic receptor 77<br>Dopamine D3 receptor 75         |
|               | 0.682                     | 2.47                | 1.08              | 5               | 44         | 87          | 14                                     | Dopamine D2 receptor 76<br>Serotonin 1a (5-HT1a) receptor 73<br>Alpha-1a adrenergic receptor 67<br>Alpha-1b adrenergic receptor 67<br>Alpha-1d adrenergic receptor 66 |
|              | 0.788                     | 1.24                | 1.81              | 4               | 50         | 85          | 15                                     | Serotonin 1a (5-HT1a) receptor 80<br>Dopamine D2 receptor 73<br>Serotonin 7 (5-HT7) receptor 68<br>Alpha-1a adrenergic receptor 64<br>Alpha-1d adrenergic receptor 62 |
|              | 0.785                     | 1.26                | 1.79              | 1               | 57         | 87          | 15                                     | Alpha-1a adrenergic receptor 80<br>Alpha-1d adrenergic receptor 79<br>Dopamine D3 receptor 78<br>Dopamine D2 receptor 78<br>Alpha-1b adrenergic receptor 72           |
|              | 0.688                     | 2.47                | 1.21              | 5               | 48         | 85          | 15                                     | Serotonin 1a (5-HT1a) receptor 80<br>Dopamine D2 receptor 73<br>Alpha-1a adrenergic receptor 69<br>Serotonin 7 (5-HT7) receptor 68<br>Alpha-1b adrenergic receptor 66 |

**Supplementary Table 5: Predictions of synthesized isoindoles**

| Structure | Desirability Synthesis | Complexity Score | Fragment Score | Name | Pareto Front | ADME Score | Dopamine D2 | Distance (D2 to 100, ADME to 50) | Top 5 predictions                                                                                                                                             |
|-----------|------------------------|------------------|----------------|------|--------------|------------|-------------|----------------------------------|---------------------------------------------------------------------------------------------------------------------------------------------------------------|
|           | 0.794                  | 1.24             | 1.94           | 2    | 2            | 50         | 92          | 8                                | Serotonin 1a (5-HT1a) receptor 93<br>Dopamine D2 receptor 82<br>Serotonin 7 (5-HT7) receptor 70<br>Alpha-1a adrenergic receptor 69<br>Dopamine D3 receptor 66 |
|           | 0.792                  | 1.26             | 1.90           | 3    | 1            | 54         | 92          | 9                                | Serotonin 1a (5-HT1a) receptor 82<br>Dopamine D2 receptor 80<br>Alpha-1a adrenergic receptor 79<br>Dopamine D3 receptor 78<br>Alpha-1d adrenergic receptor 74 |
|           | 0.793                  | 1.24             | 1.91           | 4    | 2            | 51         | 89          | 11                               | Serotonin 1a (5-HT1a) receptor 88<br>Dopamine D2 receptor 80<br>Alpha-1a adrenergic receptor 70<br>Alpha-1d adrenergic receptor 69<br>Dopamine D3 receptor 65 |
|           | 0.795                  | 1.24             | 1.96           | 5    | 3            | 50         | 86          | 14                               | Serotonin 1a (5-HT1a) receptor 89<br>Dopamine D2 receptor 76<br>Serotonin 7 (5-HT7) receptor 69<br>Alpha-1a adrenergic receptor 68<br>Dopamine D3 receptor 67 |
|           | 0.784                  | 1.24             | 1.73           | 6    | 1            | 28         | 98          | 22                               | Dopamine D2 receptor 88<br>Dopamine D3 receptor 82<br>Serotonin 1a (5-HT1a) receptor 77<br>Dopamine D4 receptor 67<br>Serotonin 2c (5-HT2c) receptor 55       |
|           | 0.782                  | 1.25             | 1.72           | 7    | 2            | 27         | 94          | 24                               | Dopamine D3 receptor 88<br>Dopamine D2 receptor 84<br>Serotonin 1a (5-HT1a) receptor 68<br>Dopamine D4 receptor 61<br>Serotonin 2a (5-HT2a) receptor 52       |
|           | 0.785                  | 1.24             | 1.76           | 8    | 1            | 23         | 100         | 27                               | Dopamine D2 receptor 90<br>Dopamine D3 receptor 84<br>Serotonin 1a (5-HT1a) receptor 82<br>Dopamine D4 receptor 65<br>Serotonin 2a (5-HT2a) receptor 56       |

**Supplementary Table 6:** Optimisation results for 5-HT1A/D2/D3/D4/ $\alpha$ 1 selectivity/CNS objectives

| Structure                                                                                         | Desirability Synthesis | Complexity Score | Fragment Score | Pareto Front | ADME Score (IV CNS) | Distance (Objectives to 150, ADME to 100) | Rank | Objectives                                  | Main Side Effect |
|---------------------------------------------------------------------------------------------------|------------------------|------------------|----------------|--------------|---------------------|-------------------------------------------|------|---------------------------------------------|------------------|
| 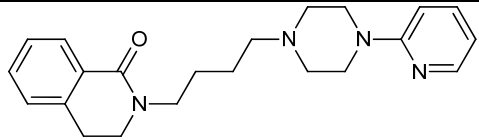<br>Compound 11a | 0.784                  | 1.23             | 1.73           | 1            | 48                  | 179                                       | 1    | 5HT1a = 78<br>D2 = 78<br>D3 = 55<br>D4 = 70 | Alpha-1a = 61    |
|                  | 0.783                  | 1.24             | 1.72           | 1            | 46                  | 180                                       | 2    | 5HT1a = 66<br>D2 = 73<br>D3 = 68<br>D4 = 76 | Alpha-1a = 64    |
|                  | 0.783                  | 1.24             | 1.73           | 1            | 46                  | 181                                       | 3    | 5HT1a = 67<br>D2 = 72<br>D3 = 65<br>D4 = 75 | Alpha-1a = 64    |
|                  | 0.781                  | 1.24             | 1.69           | 1            | 46                  | 182                                       | 4    | 5HT1a = 61<br>D2 = 73<br>D3 = 66<br>D4 = 78 | Alpha-1a = 64    |
|                 | 0.735                  | 1.93             | 1.52           | 1            | 49                  | 183                                       | 5    | 5HT1a = 66<br>D2 = 68<br>D3 = 60<br>D4 = 77 | Alpha-1a = 59    |
|                | 0.793                  | 1.24             | 1.91           | 1            | 30                  | 183                                       | 6    | 5HT1a = 78<br>D2 = 78<br>D3 = 59<br>D4 = 76 | Alpha-1a = 66    |
|                | 0.770                  | 1.23             | 1.47           | 1            | 49                  | 183                                       | 7    | 5HT1a = 62<br>D2 = 72<br>D3 = 63<br>D4 = 75 | Alpha-1a = 63    |

| Structure                                                                           | Desirability Synthesis | Complexity Score | Fragment Score | Pareto Front | ADME Score (IV CNS) | Distance (Objectives to 150, ADME to 100) | Rank | Objectives                                  | Main Side Effect |
|-------------------------------------------------------------------------------------|------------------------|------------------|----------------|--------------|---------------------|-------------------------------------------|------|---------------------------------------------|------------------|
| 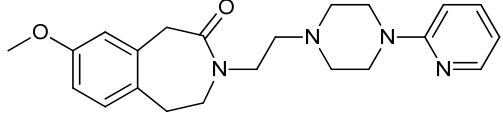   | 0.782                  | 1.24             | 1.70           | 1            | 46                  | 183                                       | 8    | 5HT1a = 62<br>D2 = 72<br>D3 = 63<br>D4 = 78 | Alpha-1a = 64    |
|    | 0.731                  | 1.93             | 1.45           | 1            | 48                  | 184                                       | 9    | 5HT1a = 70<br>D2 = 68<br>D3 = 60<br>D4 = 73 | Alpha-1a = 61    |
|    | 0.782                  | 1.24             | 1.71           | 1            | 52                  | 184                                       | 10   | 5HT1a = 62<br>D2 = 66<br>D3 = 63<br>D4 = 72 | Alpha-1a = 56    |
|    | 0.722                  | 1.94             | 1.29           | 1            | 45                  | 185                                       | 11   | 5HT1a = 74<br>D2 = 69<br>D3 = 54<br>D4 = 78 | Alpha-1a = 65    |
|   | 0.790                  | 1.24             | 1.85           | 1            | 53                  | 185                                       | 12   | 5HT1a = 58<br>D2 = 68<br>D3 = 64<br>D4 = 73 | Alpha-1a = 61    |
|  | 0.777                  | 1.24             | 1.62           | 2            | 38                  | 185                                       | 13   | 5HT1a = 62<br>D2 = 73<br>D3 = 62<br>D4 = 74 | Alpha-1a = 58    |
|  | 0.767                  | 1.23             | 1.43           | 1            | 48                  | 186                                       | 14   | 5HT1a = 57<br>D2 = 72<br>D3 = 62<br>D4 = 78 | Alpha-1a = 64    |

| Structure                                                                           | Desirability Synthesis | Complexity Score | Fragment Score | Pareto Front | ADME Score (IV CNS) | Distance (Objectives to 150, ADME to 100) | Rank | Objectives                                  | Main Side Effect |
|-------------------------------------------------------------------------------------|------------------------|------------------|----------------|--------------|---------------------|-------------------------------------------|------|---------------------------------------------|------------------|
| 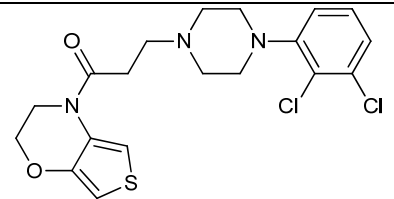   | 0.750                  | 1.23             | 1.10           | 1            | 35                  | 186                                       | 15   | 5HT1a = 60<br>D2 = 71<br>D3 = 67<br>D4 = 76 | Alpha-1a = 59    |
|    | 0.787                  | 1.24             | 1.79           | 1            | 44                  | 186                                       | 16   | 5HT1a = 64<br>D2 = 76<br>D3 = 54<br>D4 = 77 | Alpha-1a = 65    |
|    | 0.727                  | 1.94             | 1.38           | 1            | 56                  | 187                                       | 17   | 5HT1a = 62<br>D2 = 68<br>D3 = 57<br>D4 = 74 | Alpha-1a = 64    |
|    | 0.734                  | 1.93             | 1.51           | 1            | 49                  | 187                                       | 18   | 5HT1a = 67<br>D2 = 66<br>D3 = 55<br>D4 = 74 | Alpha-1a = 60    |
|   | 0.791                  | 1.24             | 1.87           | 1            | 51                  | 187                                       | 19   | 5HT1a = 72<br>D2 = 71<br>D3 = 49<br>D4 = 72 | Alpha-1a = 64    |
|  | 0.763                  | 1.24             | 1.36           | 1            | 56                  | 187                                       | 20   | 5HT1a = 55<br>D2 = 64<br>D3 = 63<br>D4 = 71 | Alpha-1a = 54    |



**Supplementary Table 7: Optimisation results for 5-HT1A/D2/D3/D4/CNS objectives**

| Structure                                                                                         | Desirability Synthesis | Complexity Score | Fragment Score | Pareto Front | ADME Score (IV CNS) | Distance (Objectives to 150, ADME to 100) | Rank | Objectives                                   | Main Side Effect |
|---------------------------------------------------------------------------------------------------|------------------------|------------------|----------------|--------------|---------------------|-------------------------------------------|------|----------------------------------------------|------------------|
| 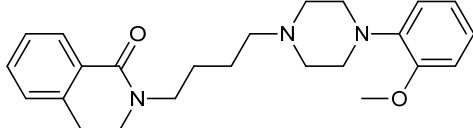<br>Compound 10a | 0.800                  | 1.24             | 2.04           | 1            | 35                  | 174                                       | 1    | 5HT1a = 103<br>D2 = 93<br>D3 = 78<br>D4 = 63 | Alpha-1a = 88    |
|                  | 0.786                  | 1.24             | 1.79           | 1            | 42                  | 174                                       | 2    | 5HT1a = 87<br>D2 = 87<br>D3 = 86<br>D4 = 68  | Alpha-1a = 91    |
|                  | 0.785                  | 1.24             | 1.76           | 1            | 46                  | 174                                       | 3    | 5HT1a = 83<br>D2 = 86<br>D3 = 85<br>D4 = 71  | Alpha-1a = 91    |
|                  | 0.762                  | 1.24             | 1.33           | 1            | 20                  | 175                                       | 4    | 5HT1a = 80<br>D2 = 91<br>D3 = 97<br>D4 = 74  | Alpha-1a = 85    |
|                  | 0.757                  | 1.24             | 1.25           | 1            | 33                  | 175                                       | 5    | 5HT1a = 79<br>D2 = 91<br>D3 = 84<br>D4 = 63  | Alpha-1a = 76    |
|                | 0.744                  | 1.95             | 1.72           | 1            | 24                  | 175                                       | 6    | 5HT1a = 82<br>D2 = 81<br>D3 = 93<br>D4 = 77  | Alpha-1a = 83    |
|                | 0.774                  | 1.24             | 1.57           | 1            | 20                  | 175                                       | 7    | 5HT1a = 67<br>D2 = 89<br>D3 = 102<br>D4 = 74 | Alpha-1a = 75    |

| Structure                                                                           | Desirability<br>Synthesis | Complexity<br>Score | Fragment<br>Score | Pareto<br>Front | ADME Score<br>(IV CNS) | Distance<br>(Objectives to 150, ADME to 100) | Rank | Objectives                                  | Main Side Effect |
|-------------------------------------------------------------------------------------|---------------------------|---------------------|-------------------|-----------------|------------------------|----------------------------------------------|------|---------------------------------------------|------------------|
| 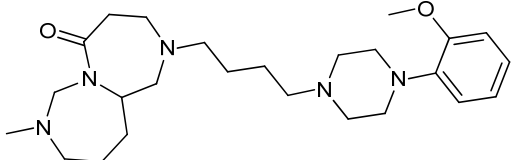   | 0.724                     | 1.95                | 1.35              | 1               | 22                     | 176                                          | 8    | 5HT1a = 84<br>D2 = 84<br>D3 = 93<br>D4 = 71 | Alpha-1a = 81    |
|    | 0.761                     | 1.24                | 1.32              | 1               | 20                     | 176                                          | 9    | 5HT1a = 80<br>D2 = 91<br>D3 = 97<br>D4 = 72 | Alpha-1a = 86    |
|    | 0.750                     | 1.24                | 1.11              | 1               | 26                     | 177                                          | 10   | 5HT1a = 73<br>D2 = 88<br>D3 = 91<br>D4 = 64 | Alpha-1a = 72    |
|    | 0.756                     | 1.94                | 1.91              | 1               | 17                     | 177                                          | 11   | 5HT1a = 79<br>D2 = 84<br>D3 = 96<br>D4 = 76 | Alpha-1a = 82    |
|   | 0.779                     | 1.24                | 1.65              | 1               | 36                     | 178                                          | 12   | 5HT1a = 96<br>D2 = 88<br>D3 = 78<br>D4 = 62 | Alpha-1a = 88    |
|  | 0.788                     | 1.24                | 1.82              | 1               | 36                     | 178                                          | 13   | 5HT1a = 80<br>D2 = 86<br>D3 = 85<br>D4 = 65 | Alpha-1a = 84    |
|  | 0.744                     | 1.24                | 1.02              | 2               | 29                     | 178                                          | 14   | 5HT1a = 79<br>D2 = 90<br>D3 = 83<br>D4 = 61 | Alpha-1a = 76    |

| Structure                                                                           | Desirability<br>Synthesis | Complexity<br>Score | Fragment<br>Score | Pareto<br>Front | ADME Score<br>(IV CNS) | Distance<br>(Objectives to 150, ADME to 100) | Rank | Objectives                                  | Main Side Effect |
|-------------------------------------------------------------------------------------|---------------------------|---------------------|-------------------|-----------------|------------------------|----------------------------------------------|------|---------------------------------------------|------------------|
| 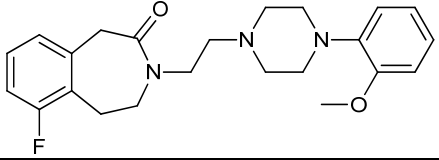   | 0.774                     | 1.24                | 1.56              | 1               | 44                     | 179                                          | 15   | 5HT1a = 98<br>D2 = 87<br>D3 = 82<br>D4 = 58 | Alpha-1a = 94    |
|    | 0.797                     | 1.24                | 1.99              | 1               | 48                     | 179                                          | 16   | 5HT1a = 97<br>D2 = 85<br>D3 = 68<br>D4 = 60 | Alpha-1a = 87    |
|    | 0.788                     | 1.24                | 1.82              | 1               | 36                     | 179                                          | 17   | 5HT1a = 82<br>D2 = 86<br>D3 = 83<br>D4 = 64 | Alpha-1a = 86    |
|    | 0.739                     | 1.95                | 1.62              | 1               | 11                     | 179                                          | 18   | 5HT1a = 81<br>D2 = 81<br>D3 = 90<br>D4 = 75 | Alpha-1a = 73    |
|   | 0.784                     | 1.25                | 1.76              | 1               | 24                     | 179                                          | 19   | 5HT1a = 97<br>D2 = 89<br>D3 = 79<br>D4 = 60 | Alpha-1a = 82    |
|  | 0.719                     | 2.36                | 1.65              | 1               | 19                     | 180                                          | 20   | 5HT1a = 81<br>D2 = 81<br>D3 = 89<br>D4 = 74 | Alpha-1a = 82    |

**Supplementary Table 8:** Predictions of synthesized benzolactams

| Structure                                                                           | Desirability<br>Synthesis | Complexity<br>Score | Fragment<br>Score | Name | Pareto<br>Front | ADME Score<br>(IV CNS) | Distance<br>(Objectives to 150, ADME to 100) | Rank | Objectives                                   | Main Side Effect |
|-------------------------------------------------------------------------------------|---------------------------|---------------------|-------------------|------|-----------------|------------------------|----------------------------------------------|------|----------------------------------------------|------------------|
| 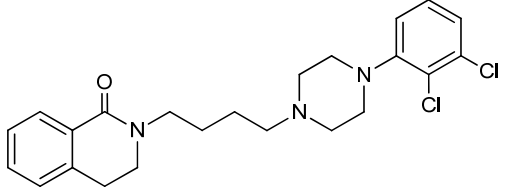   | 0.782                     | 1.24                | 1.72              | 9a   | 1               | 7                      | 171                                          | 1    | 5HT1a = 91<br>D2 = 102<br>D3 = 96<br>D4 = 73 | Alpha-1a = 77    |
|    | 0.781                     | 1.25                | 1.70              | 9b   | 1               | 7                      | 173                                          | 2    | 5HT1a = 91<br>D2 = 103<br>D3 = 93<br>D4 = 69 | Alpha-1a = 78    |
|    | 0.800                     | 1.24                | 2.04              | 10a  | 1               | 35                     | 174                                          | 3    | 5HT1a = 103<br>D2 = 93<br>D3 = 78<br>D4 = 63 | Alpha-1a = 88    |
|   | 0.784                     | 1.23                | 1.73              | 11a  | 1               | 48                     | 179                                          | 4    | 5HT1a = 78<br>D2 = 78<br>D3 = 55<br>D4 = 70  | Alpha-1a = 61    |
|  | 0.782                     | 1.24                | 1.71              | 10b  | 1               | 47                     | 182                                          | 5    | 5HT1a = 79<br>D2 = 80<br>D3 = 52<br>D4 = 66  | Alpha-1a = 61    |
|  | 0.798                     | 1.25                | 2.01              | 11b  | 1               | 17                     | 184                                          | 6    | 5HT1a = 104<br>D2 = 94<br>D3 = 75<br>D4 = 59 | Alpha-1a = 89    |

**Supplementary Table 9:** Optimisation results for D4/CNS objectives

| Structure                                                                                            | Desirability<br>Synthesis | Complexity<br>Score | Fragment<br>Score | Pareto<br>Front | ADME<br>Score | Dopamine<br>D4 | Distance<br>(D4 to 150,<br>ADME to 50) | Top 5 predictions                                                                                                                                                                   |
|------------------------------------------------------------------------------------------------------|---------------------------|---------------------|-------------------|-----------------|---------------|----------------|----------------------------------------|-------------------------------------------------------------------------------------------------------------------------------------------------------------------------------------|
| 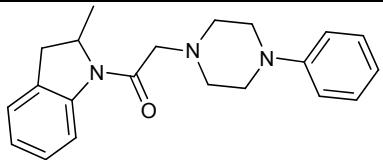 <p>Compound 12</p> | 0.742                     | 1.92                | 1.64              | 1               | 49            | 120            | 31                                     | Dopamine D4 receptor 112<br>Dopamine D2 receptor 73<br>Tripeptidyl aminopeptidase 28<br>Serotonin 7 (5-HT7) receptor 27<br>Voltage-gated T-type calcium channel alpha-1G subunit 23 |
|  <p>Compound 13</p> | 0.700                     | 2.46                | 1.40              | 2               | 41            | 119            | 32                                     | Dopamine D4 receptor 112<br>Dopamine D2 receptor 31<br>Tripeptidyl aminopeptidase 23<br>Serotonin 3b (5-HT3b) receptor 15<br>Serotonin 3a (5-HT3a) receptor 15                      |
|  <p>Compound 13</p> | 0.748                     | 1.92                | 1.75              | 1               | 33            | 122            | 32                                     | Dopamine D4 receptor 113<br>Dopamine D2 receptor 68<br>Sigma opioid receptor 29<br>Tripeptidyl aminopeptidase 26<br>Muscarinic acetylcholine receptor M3 23                         |
|                    | 0.706                     | 2.46                | 1.51              | 3               | 40            | 119            | 32                                     | Dopamine D4 receptor 113<br>Tripeptidyl aminopeptidase 32<br>Dopamine D2 receptor 31<br>Serotonin 3b (5-HT3b) receptor 17<br>Serotonin 3a (5-HT3a) receptor 17                      |
|                   | 0.750                     | 1.76                | 1.63              | 2               | 48            | 112            | 39                                     | Dopamine D4 receptor 106<br>Dopamine D2 receptor 31<br>Cytochrome P450 1A2 24<br>Serotonin 3b (5-HT3b) receptor 20<br>Serotonin 3a (5-HT3a) receptor 19                             |
|                   | 0.747                     | 1.76                | 1.59              | 2               | 48            | 111            | 40                                     | Dopamine D4 receptor 105<br>Dopamine D2 receptor 30<br>Cytochrome P450 1A2 21<br>Serotonin 3b (5-HT3b) receptor 18<br>Serotonin 3a (5-HT3a) receptor 18                             |

| Structure                                                                           | Desirability<br>Synthesis | Complexity<br>Score | Fragment<br>Score | Pareto<br>Front | ADME<br>Score | Dopamine<br>D4 | Distance<br>(D4 to 150,<br>ADME to 50) | Top 5 predictions                                                                                                                                              |
|-------------------------------------------------------------------------------------|---------------------------|---------------------|-------------------|-----------------|---------------|----------------|----------------------------------------|----------------------------------------------------------------------------------------------------------------------------------------------------------------|
| 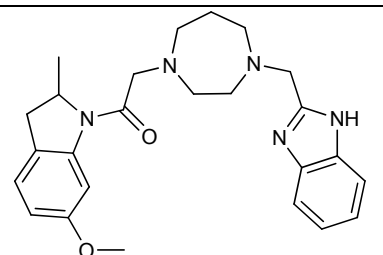   | 0.698                     | 2.46                | 1.38              | 4               | 36            | 112            | 41                                     | Dopamine D4 receptor 105<br>Dopamine D2 receptor 29<br>Tripeptidyl aminopeptidase 22<br>Serotonin 7 (5-HT7) receptor 13<br>Alpha-2c adrenergic receptor 12     |
|    | 0.704                     | 2.46                | 1.49              | 5               | 35            | 112            | 41                                     | Dopamine D4 receptor 105<br>Tripeptidyl aminopeptidase 31<br>Dopamine D2 receptor 28<br>Serotonin 3b (5-HT3b) receptor 13<br>Serotonin 3a (5-HT3a) receptor 13 |
|    | 0.715                     | 1.97                | 1.19              | 4               | 29            | 115            | 41                                     | Dopamine D4 receptor 106<br>Dopamine D3 receptor 46<br>Dopamine D2 receptor 40<br>Cytochrome P450 3A4 15<br>Serotonin 7 (5-HT7) receptor 11                    |
|   | 0.762                     | 1.27                | 1.36              | 3               | 41            | 109            | 42                                     | Dopamine D4 receptor 101<br>Dopamine D3 receptor 53<br>Dopamine D2 receptor 40<br>Cytochrome P450 1A2 27<br>Cytochrome P450 3A4 22                             |
|  | 0.734                     | 1.94                | 1.52              | 1               | 56            | 108            | 42                                     | Dopamine D4 receptor 99<br>Dopamine D2 receptor 62<br>Dopamine D3 receptor 26<br>Alpha-2a adrenergic receptor 15<br>Serotonin 1a (5-HT1a) receptor 14          |

| Structure                                                                          | Desirability<br>Synthesis | Complexity<br>Score | Fragment<br>Score | Pareto<br>Front | ADME<br>Score | Dopamine<br>D4 | Distance<br>(D4 to 150,<br>ADME to 50) | Top 5 predictions                                                                                                                                                                                   |
|------------------------------------------------------------------------------------|---------------------------|---------------------|-------------------|-----------------|---------------|----------------|----------------------------------------|-----------------------------------------------------------------------------------------------------------------------------------------------------------------------------------------------------|
| 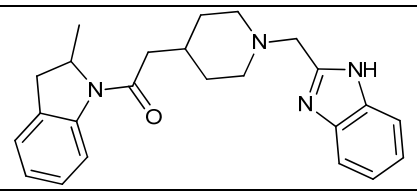  | 0.694                     | 2.45                | 1.28              | 2               | 19            | 121            | 42                                     | Dopamine D4 receptor 119<br>Dopamine D2 receptor 43<br>Tripeptidyl aminopeptidase 14<br>Serotonin 3b (5-HT3b) receptor 14<br>Serotonin 3a (5-HT3a) receptor 14                                      |
|   | 0.745                     | 1.94                | 1.72              | 5               | 26            | 113            | 44                                     | Dopamine D4 receptor 103<br>Dopamine D2 receptor 58<br>Voltage-gated T-type calcium channel alpha-1G subunit 27<br>Sigma opioid receptor 18<br>Dopamine D3 receptor 14                              |
|   | 0.748                     | 1.76                | 1.60              | 3               | 47            | 106            | 45                                     | Dopamine D4 receptor 99<br>Dopamine D2 receptor 25<br>Serotonin 3b (5-HT3b) receptor 19<br>Serotonin 3a (5-HT3a) receptor 19<br>Tripeptidyl aminopeptidase 18                                       |
|   | 0.752                     | 1.94                | 1.85              | 6               | 25            | 113            | 45                                     | Dopamine D4 receptor 103<br>Dopamine D2 receptor 57<br>Voltage-gated T-type calcium channel alpha-1G subunit 26<br>Sigma opioid receptor 17<br>3-beta-hydroxysteroid-delta(8),delta(7)-isomerase 17 |
|  | 0.690                     | 2.46                | 1.23              | 6               | 34            | 108            | 45                                     | Dopamine D4 receptor 102<br>Dopamine D2 receptor 23<br>Serotonin 3b (5-HT3b) receptor 22<br>Serotonin 3a (5-HT3a) receptor 22<br>Tripeptidyl aminopeptidase 18                                      |

| Structure                                                                          | Desirability<br>Synthesis | Complexity<br>Score | Fragment<br>Score | Pareto<br>Front | ADME<br>Score | Dopamine<br>D4 | Distance<br>(D4 to 150,<br>ADME to 50) | Top 5 predictions                                                                                                                                              |
|------------------------------------------------------------------------------------|---------------------------|---------------------|-------------------|-----------------|---------------|----------------|----------------------------------------|----------------------------------------------------------------------------------------------------------------------------------------------------------------|
| 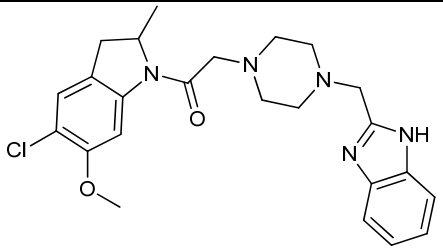  | 0.694                     | 2.46                | 1.30              | 6               | 29            | 110            | 45                                     | Dopamine D4 receptor 102<br>Dopamine D2 receptor 25<br>Serotonin 3b (5-HT3b) receptor 24<br>Serotonin 3a (5-HT3a) receptor 24<br>Tripeptidyl aminopeptidase 17 |
|   | 0.692                     | 2.46                | 1.26              | 7               | 33            | 108            | 46                                     | Dopamine D4 receptor 101<br>Dopamine D2 receptor 23<br>Serotonin 3b (5-HT3b) receptor 21<br>Serotonin 3a (5-HT3a) receptor 21<br>Tripeptidyl aminopeptidase 18 |
|   | 0.657                     | 2.80                | 0.946             | 4               | 38            | 106            | 46                                     | Dopamine D4 receptor 98<br>Dopamine D2 receptor 28<br>Serotonin 3b (5-HT3b) receptor 22<br>Serotonin 3a (5-HT3a) receptor 22<br>Tripeptidyl aminopeptidase 20  |
|  | 0.685                     | 2.47                | 1.13              | 7               | 28            | 110            | 46                                     | Dopamine D4 receptor 103<br>Dopamine D2 receptor 26<br>Serotonin 3b (5-HT3b) receptor 24<br>Serotonin 3a (5-HT3a) receptor 24<br>Tripeptidyl aminopeptidase 18 |



Supplementary Table 10: Optimisation results for novelty/D4 selectivity/CNS objectives

| Structure                                                                           | Desirability Synthesis | Complexity Score | Fragment Score | Pareto Front | ADME Score | Dopamine D4 | Distance (ADME = 75; D4=150) | Top 5 predictions                                                                                                                                     |
|-------------------------------------------------------------------------------------|------------------------|------------------|----------------|--------------|------------|-------------|------------------------------|-------------------------------------------------------------------------------------------------------------------------------------------------------|
| 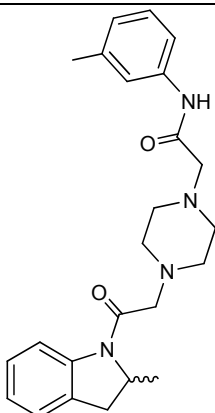   | 0.740                  | 1.94             | 1.64           | 1            | 40         | 114         | 74                           | Dopamine D4 receptor 114<br>Dopamine D2 receptor 29<br>Palmitoyl-CoA oxidase 28<br>Tripeptidyl aminopeptidase 23<br>Neuropeptide Y receptor type 5 23 |
|    | 0.727                  | 1.93             | 1.37           | 1            | 36         | 93          | 76                           | Dopamine D4 receptor 93<br>Tripeptidyl aminopeptidase 23<br>Dopamine D2 receptor 22<br>Neuropeptide Y receptor type 5 20<br>Ecdysone receptor 13      |
|  | 0.786                  | 1.24             | 1.78           | 3            | 42         | 92          | 77                           | Dopamine D4 receptor 92<br>Palmitoyl-CoA oxidase 30<br>Neuropeptide Y receptor type 5 25<br>Vasopressin V2 receptor 20<br>Dopamine D2 receptor 18     |

| Structure                                                                          | Desirability<br>Synthesis | Complexity<br>Score | Fragment<br>Score | Pareto<br>Front | ADME Score | Dopamine<br>D4 | Distance<br>(ADME = 75; D4=150) | Top 5 predictions                                                                                                                                                           |
|------------------------------------------------------------------------------------|---------------------------|---------------------|-------------------|-----------------|------------|----------------|---------------------------------|-----------------------------------------------------------------------------------------------------------------------------------------------------------------------------|
| 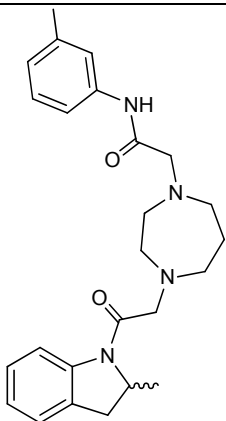  | 0.738                     | 1.95                | 1.60              | 1               | 37         | 108            | 78                              | Dopamine D4 receptor 108<br>Dopamine D2 receptor 27<br>Palmitoyl-CoA oxidase 23<br>Neuropeptide Y receptor type 5 23<br>Tripeptidyl aminopeptidase 23                       |
|   | 0.729                     | 1.93                | 1.41              | 4               | 37         | 92             | 79                              | Dopamine D4 receptor 92<br>Dopamine D2 receptor 29<br>Dopamine D5 receptor 20<br>Vasopressin V1a receptor 11<br>Neuronal acetylcholine receptor protein alpha-10 subunit 10 |
|  | 0.731                     | 1.93                | 1.46              | 5               | 36         | 93             | 80                              | Dopamine D4 receptor 93<br>Dopamine D2 receptor 31<br>Vasopressin V1a receptor 19<br>Dopamine D5 receptor 17<br>Hormone sensitive lipase 13                                 |

| Structure                                                                           | Desirability<br>Synthesis | Complexity<br>Score | Fragment<br>Score | Pareto<br>Front | ADME Score | Dopamine<br>D4 | Distance<br>(ADME = 75; D4=150) | Top 5 predictions                                                                                                                                     |
|-------------------------------------------------------------------------------------|---------------------------|---------------------|-------------------|-----------------|------------|----------------|---------------------------------|-------------------------------------------------------------------------------------------------------------------------------------------------------|
| 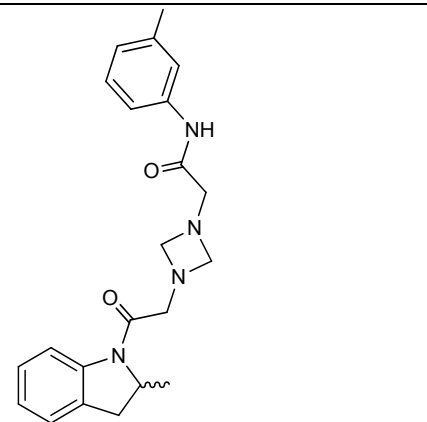   | 0.727                     | 1.93                | 1.38              | 1               | 40         | 92             | 81                              | Dopamine D4 receptor 92<br>Tripeptidyl aminopeptidase 25<br>Dopamine D2 receptor 23<br>Neuropeptide Y receptor type 5 20<br>Ecdysone receptor 15      |
|   | 0.734                     | 1.94                | 1.52              | 2               | 22         | 113            | 82                              | Dopamine D4 receptor 113<br>Neuropeptide Y receptor type 5 33<br>Dopamine D2 receptor 29<br>Tripeptidyl aminopeptidase 22<br>Palmitoyl-CoA oxidase 14 |
|  | 0.732                     | 1.93                | 1.48              | 4               | 31         | 94             | 82                              | Dopamine D4 receptor 95<br>Dopamine D2 receptor 31<br>Dopamine D5 receptor 21<br>Vasopressin V1a receptor 15<br>Hormone sensitive lipase 14           |

| Structure                                                                           | Desirability<br>Synthesis | Complexity<br>Score | Fragment<br>Score | Pareto<br>Front | ADME Score | Dopamine<br>D4 | Distance<br>(ADME = 75; D4=150) | Top 5 predictions                                                                                                                                                   |
|-------------------------------------------------------------------------------------|---------------------------|---------------------|-------------------|-----------------|------------|----------------|---------------------------------|---------------------------------------------------------------------------------------------------------------------------------------------------------------------|
| 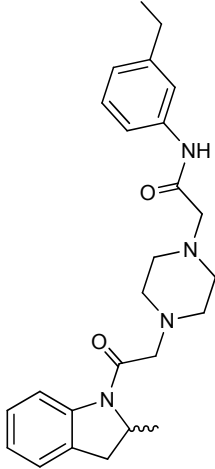   | 0.740                     | 1.95                | 1.63              | 1               | 36         | 100            | 82                              | Dopamine D4 receptor 101<br>Tripeptidyl aminopeptidase 26<br>Dopamine D2 receptor 24<br>Palmitoyl-CoA oxidase 19<br>Tryptase beta-2 18                              |
|   | 0.733                     | 1.93                | 1.48              | 6               | 42         | 96             | 83                              | Dopamine D4 receptor 97<br>Dopamine D2 receptor 47<br>Tripeptidyl aminopeptidase 30<br>Neuropeptide Y receptor type 5 17<br>Muscarinic acetylcholine receptor M3 16 |
|  | 0.740                     | 1.95                | 1.63              | 1               | 39         | 98             | 84                              | Dopamine D4 receptor 98<br>Palmitoyl-CoA oxidase 28<br>Neuropeptide Y receptor type 5 27<br>Dopamine D2 receptor 20<br>Tripeptidyl aminopeptidase 17                |

| Structure                                                                          | Desirability<br>Synthesis | Complexity<br>Score | Fragment<br>Score | Pareto<br>Front | ADME Score | Dopamine<br>D4 | Distance<br>(ADME = 75; D4=150) | Top 5 predictions                                                                                                                                    |
|------------------------------------------------------------------------------------|---------------------------|---------------------|-------------------|-----------------|------------|----------------|---------------------------------|------------------------------------------------------------------------------------------------------------------------------------------------------|
| 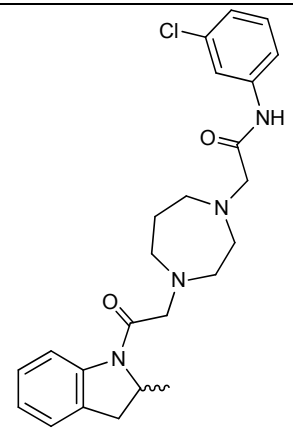  | 0.742                     | 1.95                | 1.68              | 2               | 33         | 98             | 85                              | Dopamine D4 receptor 98<br>Dopamine D2 receptor 29<br>Tripeptidyl aminopeptidase 23<br>Palmitoyl-CoA oxidase 22<br>Neuropeptide Y receptor type 5 21 |
|   | 0.673                     | 2.45                | 0.905             | 4               | 49         | 96             | 85                              | Dopamine D4 receptor 97<br>Dopamine D2 receptor 56<br>Dopamine D3 receptor 26<br>Sigma opioid receptor 21<br>Muscarinic acetylcholine receptor M3 19 |
|  | 0.720                     | 1.96                | 1.28              | 2               | 50         | 107            | 86                              | Dopamine D4 receptor 108<br>Dopamine D2 receptor 56<br>Tripeptidyl aminopeptidase 25<br>TGF-beta receptor type I 13<br>TGF-beta receptor type II 12  |

| Structure                                                                          | Desirability<br>Synthesis | Complexity<br>Score | Fragment<br>Score | Pareto<br>Front | ADME Score | Dopamine<br>D4 | Distance<br>(ADME = 75; D4=150) | Top 5 predictions                                                                                                                                             |
|------------------------------------------------------------------------------------|---------------------------|---------------------|-------------------|-----------------|------------|----------------|---------------------------------|---------------------------------------------------------------------------------------------------------------------------------------------------------------|
| 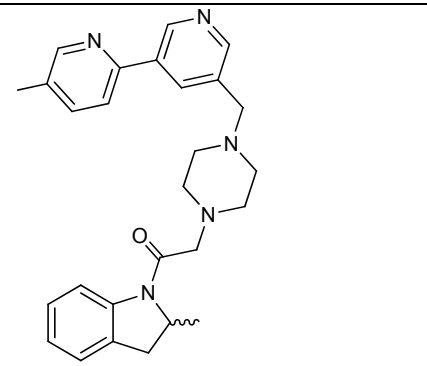  | 0.716                     | 1.96                | 1.20              | 1               | 50         | 110            | 86                              | Dopamine D4 receptor 111<br>Dopamine D2 receptor 58<br>Tripeptidyl aminopeptidase 24<br>Dopamine D3 receptor 7<br>Muscarinic acetylcholine receptor M3 7      |
|   | 0.719                     | 1.95                | 1.24              | 2               | 52         | 103            | 86                              | Dopamine D4 receptor 104<br>Dopamine D2 receptor 58<br>Tripeptidyl aminopeptidase 24<br>Dopamine D3 receptor 11<br>Serotonin 7 (5-HT7) receptor 10            |
|  | 0.718                     | 1.95                | 1.24              | 1               | 55         | 100            | 86                              | Dopamine D4 receptor 101<br>Dopamine D2 receptor 54<br>Tripeptidyl aminopeptidase 24<br>TGF-beta receptor type II 6<br>Muscarinic acetylcholine receptor M3 6 |

| Structure                                                                         | Desirability<br>Synthesis | Complexity<br>Score | Fragment<br>Score | Pareto<br>Front | ADME Score | Dopamine<br>D4 | Distance<br>(ADME = 75; D4=150) | Top 5 predictions                                                                                                                                                           |
|-----------------------------------------------------------------------------------|---------------------------|---------------------|-------------------|-----------------|------------|----------------|---------------------------------|-----------------------------------------------------------------------------------------------------------------------------------------------------------------------------|
| 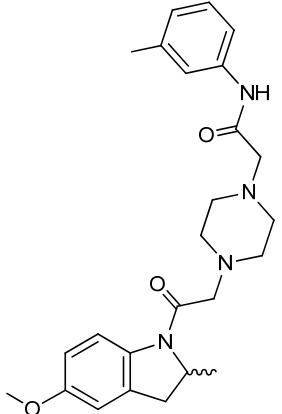 | 0.743                     | 1.95                | 1.70              | 1               | 41         | 96             | 86                              | Dopamine D4 receptor 96<br>Neuropeptide Y receptor type 5 30<br>Palmitoyl-CoA oxidase 30<br>Tyrosine-protein kinase receptor FLT3 16<br>Stem cell growth factor receptor 16 |
|  | 0.705                     | 1.93                | 0.967             | 5               | 50         | 91             | 86                              | Dopamine D4 receptor 91<br>Dopamine D2 receptor 52<br>Tripeptidyl aminopeptidase 24<br>Dopamine D3 receptor 19<br>Muscarinic acetylcholine receptor M1 18                   |

**Supplementary Table 11: Predictions of synthesized morpholinos**

| Structure                                                                           | Desirability<br>Synthesis | Complexity<br>Score | Fragment<br>Score | Name | Pareto<br>Front | ADME<br>Score | Dopamine<br>D4 | Distance<br>(ADME = 75;<br>D4=150) | Top 5 predictions                                                                                                                                                           | Rank |
|-------------------------------------------------------------------------------------|---------------------------|---------------------|-------------------|------|-----------------|---------------|----------------|------------------------------------|-----------------------------------------------------------------------------------------------------------------------------------------------------------------------------|------|
| 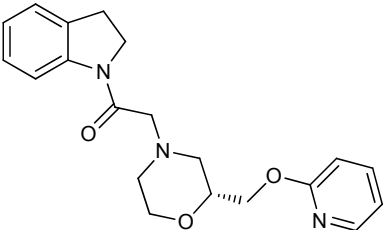   | 0.712                     | 1.92                | 1.09              | 14r  | 1               | 57            | 84             | 76                                 | Dopamine D4 receptor 84<br>Dopamine D2 receptor 28<br>Dopamine D5 receptor 14<br>Vasopressin V2 receptor 11<br>Tripeptidyl aminopeptidase 10                                | 2    |
|    | 0.710                     | 1.92                | 1.05              | 15r  | 2               | 54            | 61             | 95                                 | Dopamine D4 receptor 61<br>Dopamine D5 receptor 19<br>Serotonin 2c (5-HT2c) receptor 18<br>Dopamine D2 receptor 16<br>Dopamine D1 receptor 15                               | 12   |
|    | 0.714                     | 1.93                | 1.13              | 16r  | 1               | 59            | 83             | 74                                 | Dopamine D4 receptor 83<br>Dopamine D2 receptor 22<br>Dopamine D5 receptor 13<br>Vasopressin V2 receptor 11<br>Vasopressin V1a receptor 10                                  | 1    |
|   | 0.713                     | 1.92                | 1.10              | 17r  | 1               | 56            | 60             | 95                                 | Dopamine D4 receptor 60<br>Dopamine D5 receptor 18<br>Dopamine D1 receptor 17<br>Serotonin 2c (5-HT2c) receptor 17<br>Serotonin 7 (5-HT7) receptor 15                       | 11   |
|  | 0.727                     | 1.92                | 1.38              | 18s  | 1               | 34            | 89             | 81                                 | Dopamine D4 receptor 89<br>Dopamine D2 receptor 28<br>Dopamine D5 receptor 21<br>Neuronal acetylcholine receptor protein alpha-10 subunit 14<br>Vasopressin V1a receptor 13 | 5    |



| Structure                                                                           | Desirability<br>Synthesis | Complexity<br>Score | Fragment<br>Score | Name | Pareto<br>Front | ADME<br>Score | Dopamine<br>D4 | Distance<br>(ADME = 75;<br>D4=150) | Top 5 predictions                                                                                                                                                                 | Rank |
|-------------------------------------------------------------------------------------|---------------------------|---------------------|-------------------|------|-----------------|---------------|----------------|------------------------------------|-----------------------------------------------------------------------------------------------------------------------------------------------------------------------------------|------|
| 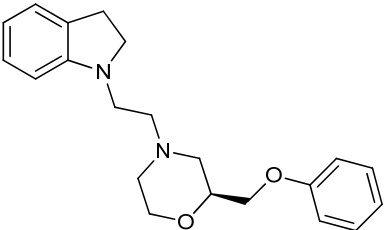   | 0.727                     | 1.92                | 1.36              | 19s  | 2               | 26            | 66             | 100                                | Dopamine D4 receptor 66<br>Dopamine D5 receptor 26<br>Neuronal acetylcholine receptor protein alpha-10 subunit 18<br>Dopamine D1 receptor 18<br>Serotonin 2c (5-HT2c) receptor 18 | 18   |
|    | 0.724                     | 1.92                | 1.31              | 20r  | 2               | 57            | 77             | 80                                 | Dopamine D4 receptor 77<br>Cytochrome P450 1A2 16<br>Dopamine D2 receptor 15<br>Cytochrome P450 3A4 15<br>Cytochrome P450 11B1 12                                                 | 4    |
|    | 0.723                     | 1.92                | 1.29              | 21r  | 3               | 54            | 55             | 103                                | Dopamine D4 receptor 55<br>Cytochrome P450 3A4 23<br>Dopamine D5 receptor 16<br>Cytochrome P450 11B1 15<br>Cytochrome P450 1A2 12                                                 | 21   |
|   | 0.724                     | 1.92                | 1.31              | 20s  | 2               | 57            | 77             | 80                                 | Dopamine D4 receptor 77<br>Cytochrome P450 1A2 16<br>Dopamine D2 receptor 15<br>Cytochrome P450 3A4 15<br>Cytochrome P450 11B1 12                                                 | 3    |
|  | 0.723                     | 1.92                | 1.29              | 21s  | 3               | 54            | 55             | 103                                | Dopamine D4 receptor 55<br>Cytochrome P450 3A4 23<br>Dopamine D5 receptor 16<br>Cytochrome P450 11B1 15<br>Cytochrome P450 1A2 12                                                 | 22   |

| Structure                                                                           | Desirability<br>Synthesis | Complexity<br>Score | Fragment<br>Score | Name | Pareto<br>Front | ADME<br>Score | Dopamine<br>D4 | Distance<br>(ADME = 75;<br>D4=150) | Top 5 predictions                                                                                                                                                                    | Rank |
|-------------------------------------------------------------------------------------|---------------------------|---------------------|-------------------|------|-----------------|---------------|----------------|------------------------------------|--------------------------------------------------------------------------------------------------------------------------------------------------------------------------------------|------|
| 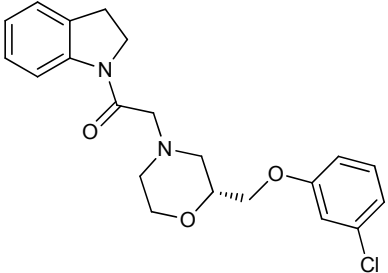   | 0.730                     | 1.93                | 1.43              | 22r  | 1               | 29            | 90             | 83                                 | Dopamine D4 receptor 90<br>Dopamine D2 receptor 32<br>Dopamine D5 receptor 24<br>Neuronal acetylcholine receptor protein alpha-10 subunit 16<br>Estradiol 17-beta-dehydrogenase 3 15 | 10   |
|    | 0.730                     | 1.92                | 1.42              | 23r  | 2               | 14            | 67             | 107                                | Dopamine D4 receptor 67<br>Dopamine D5 receptor 29<br>Neuronal acetylcholine receptor protein alpha-10 subunit 21<br>Dopamine D2 receptor 20<br>Dopamine D3 receptor 19              | 23   |
|   | 0.730                     | 1.93                | 1.43              | 22s  | 1               | 29            | 90             | 83                                 | Dopamine D4 receptor 90<br>Dopamine D2 receptor 32<br>Dopamine D5 receptor 24<br>Neuronal acetylcholine receptor protein alpha-10 subunit 16<br>Estradiol 17-beta-dehydrogenase 3 15 | 9    |
|  | 0.730                     | 1.92                | 1.42              | 23s  | 2               | 14            | 67             | 107                                | Dopamine D4 receptor 67<br>Dopamine D5 receptor 29<br>Neuronal acetylcholine receptor protein alpha-10 subunit 21<br>Dopamine D2 receptor 20<br>Dopamine D3 receptor 19              | 24   |

| Structure                                                                           | Desirability<br>Synthesis | Complexity<br>Score | Fragment<br>Score | Name | Pareto<br>Front | ADME<br>Score | Dopamine<br>D4 | Distance<br>(ADME = 75;<br>D4=150) | Top 5 predictions                                                                                                                                                               | Rank |
|-------------------------------------------------------------------------------------|---------------------------|---------------------|-------------------|------|-----------------|---------------|----------------|------------------------------------|---------------------------------------------------------------------------------------------------------------------------------------------------------------------------------|------|
| 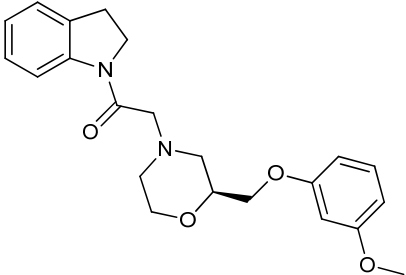   | 0.734                     | 1.93                | 1.52              | 24s  | 1               | 33            | 86             | 81                                 | Dopamine D4 receptor 86<br>Dopamine D5 receptor 26<br>Dopamine D2 receptor 25<br>Neuronal acetylcholine receptor protein alpha-10 subunit 19<br>Melatonin receptor 1B 17        | 8    |
|    | 0.734                     | 1.93                | 1.51              | 25s  | 2               | 27            | 64             | 102                                | Dopamine D4 receptor 64<br>Dopamine D5 receptor 32<br>Neuronal acetylcholine receptor protein alpha-10 subunit 24<br>Serotonin 7 (5-HT7) receptor 17<br>Dopamine D3 receptor 16 | 19   |
|   | 0.734                     | 1.93                | 1.51              | 25r  | 2               | 27            | 64             | 102                                | Dopamine D4 receptor 64<br>Dopamine D5 receptor 32<br>Neuronal acetylcholine receptor protein alpha-10 subunit 24<br>Serotonin 7 (5-HT7) receptor 17<br>Dopamine D3 receptor 16 | 20   |
|  | 0.718                     | 1.92                | 1.20              | 26r  | 1               | 56            | 75             | 81                                 | Dopamine D4 receptor 75<br>Dopamine D5 receptor 19<br>Dopamine D1 receptor 18<br>Dopamine D3 receptor 17<br>Serotonin 2c (5-HT2c) receptor 16                                   | 6    |

| Structure | Desirability<br>Synthesis | Complexity<br>Score | Fragment<br>Score | Name | Pareto<br>Front | ADME<br>Score | Dopamine<br>D4 | Distance<br>(ADME = 75;<br>D4=150) | Top 5 predictions                                                                                                                                                     | Rank |
|-----------|---------------------------|---------------------|-------------------|------|-----------------|---------------|----------------|------------------------------------|-----------------------------------------------------------------------------------------------------------------------------------------------------------------------|------|
|           | 0.718                     | 1.92                | 1.20              | 26s  | 1               | 56            | 75             | 81                                 | Dopamine D4 receptor 75<br>Dopamine D5 receptor 19<br>Dopamine D1 receptor 18<br>Dopamine D3 receptor 17<br>Serotonin 2c (5-HT2c) receptor 16                         | 7    |
|           | 0.717                     | 1.92                | 1.18              | 27r  | 3               | 52            | 58             | 99                                 | Dopamine D4 receptor 58<br>Dopamine D5 receptor 23<br>Neuronal acetylcholine receptor protein alpha-4 subunit 18<br>Dopamine D1 receptor 17<br>Cytochrome P450 3A4 16 | 16   |
|           | 0.717                     | 1.92                | 1.18              | 27s  | 3               | 52            | 58             | 99                                 | Dopamine D4 receptor 58<br>Dopamine D5 receptor 23<br>Neuronal acetylcholine receptor protein alpha-4 subunit 18<br>Dopamine D1 receptor 17<br>Cytochrome P450 3A4 16 | 15   |
|           | 0.718                     | 1.92                | 1.20              | 28r  | 1               | 56            | 56             | 98                                 | Dopamine D4 receptor 56<br>Dopamine D5 receptor 20<br>Cytochrome P450 3A4 15<br>Dopamine D1 receptor 13<br>Serotonin 2c (5-HT2c) receptor 13                          | 14   |

| Structure                                                                         | Desirability<br>Synthesis | Complexity<br>Score | Fragment<br>Score | Name | Pareto<br>Front | ADME<br>Score | Dopamine<br>D4 | Distance<br>(ADME = 75;<br>D4=150) | Top 5 predictions                                                                                                                             | Rank |
|-----------------------------------------------------------------------------------|---------------------------|---------------------|-------------------|------|-----------------|---------------|----------------|------------------------------------|-----------------------------------------------------------------------------------------------------------------------------------------------|------|
| 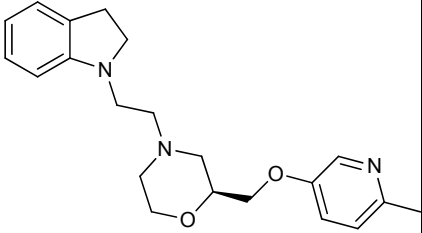 | 0.718                     | 1.92                | 1.20              | 28s  | 1               | 56            | 56             | 98                                 | Dopamine D4 receptor 56<br>Dopamine D5 receptor 20<br>Cytochrome P450 3A4 15<br>Dopamine D1 receptor 13<br>Serotonin 2c (5-HT2c) receptor 13  | 13   |
|  | 0.704                     | 1.93                | 0.946             | 29r  | 1               | 47            | 58             | 99                                 | Dopamine D4 receptor 58<br>Dopamine D5 receptor 19<br>Dopamine D1 receptor 18<br>Serotonin 2c (5-HT2c) receptor 14<br>Dopamine D3 receptor 14 | 17   |

## Supplementary Table 12: Bayesian model statistics

Table 12a is the general statistics for the high confidence models for the GPCR receptors using ChEMBL data and high confidence score.

Table 12b represents specific validation using MCC to define a cut-off score for good/bad predictions for the GPCR receptors using ChEMBL data and high confidence score.

Table 12c is the results of the pipeline pilot internal validation on the dopamine models using all data and a pre release of ChEMBL.

**Supplementary Table 12a:** Chembl (release 1) high confidence model statistics

| Target                       | Set Of compounds | Active | Inactive | AUC   | Recall 5% | SLR   | SLR Limit | BEDROC |
|------------------------------|------------------|--------|----------|-------|-----------|-------|-----------|--------|
| Alpha-1a adrenergic receptor | TestSet          | 682    | 68507    | 0.971 | 86.95     | 4431  | 6875      | 0.783  |
|                              | TrainingSet      | 410    | 63780    | 0.995 | 98.54     | 2276  | 4095      | 0.923  |
|                              | WholeSet         | 1092   | 132287   | 0.996 | 98.63     | 6885  | 11740     | 0.940  |
| Alpha-1b adrenergic receptor | TestSet          | 501    | 68688    | 0.970 | 86.43     | 3159  | 5045      | 0.779  |
|                              | TrainingSet      | 273    | 63917    | 0.996 | 99.27     | 1422  | 2721      | 0.930  |
|                              | WholeSet         | 774    | 132605   | 0.996 | 98.97     | 4673  | 8314      | 0.941  |
| Alpha-1d adrenergic receptor | TestSet          | 623    | 68566    | 0.968 | 83.95     | 4076  | 6278      | 0.753  |
|                              | TrainingSet      | 342    | 63848    | 0.996 | 99.12     | 1802  | 3413      | 0.943  |
|                              | WholeSet         | 965    | 132414   | 0.997 | 99.48     | 5947  | 10371     | 0.949  |
| Alpha-2a adrenergic receptor | TestSet          | 239    | 68950    | 0.851 | 42.68     | 1870  | 2399      | 0.400  |
|                              | TrainingSet      | 135    | 64055    | 0.999 | 100.00    | 579   | 1340      | 0.979  |
|                              | WholeSet         | 374    | 133005   | 0.998 | 100.00    | 1971  | 4007      | 0.973  |
| Alpha-2b adrenergic receptor | TestSet          | 107    | 69082    | 0.773 | 33.64     | 883   | 1068      | 0.311  |
|                              | TrainingSet      | 103    | 64087    | 0.999 | 99.03     | 420   | 1020      | 0.979  |
|                              | WholeSet         | 210    | 133169   | 0.998 | 99.52     | 1062  | 2244      | 0.972  |
| Alpha-2c adrenergic receptor | TestSet          | 154    | 69035    | 0.710 | 17.53     | 1396  | 1541      | 0.184  |
|                              | TrainingSet      | 105    | 64085    | 0.999 | 99.05     | 422   | 1040      | 0.981  |
|                              | WholeSet         | 259    | 133120   | 0.998 | 99.23     | 1251  | 2770      | 0.980  |
| Dopamine D1 receptor         | TestSet          | 383    | 68806    | 0.981 | 91.38     | 2420  | 3853      | 0.805  |
|                              | TrainingSet      | 366    | 63824    | 0.998 | 99.45     | 1900  | 3653      | 0.962  |
|                              | WholeSet         | 749    | 132630   | 0.998 | 99.60     | 4442  | 8044      | 0.960  |
| Dopamine D2 receptor         | TestSet          | 1959   | 67230    | 0.972 | 73.66     | 14331 | 19800     | 0.740  |
|                              | TrainingSet      | 2281   | 61909    | 0.994 | 93.29     | 15751 | 22890     | 0.926  |
|                              | WholeSet         | 4240   | 129139   | 0.994 | 94.10     | 32072 | 45688     | 0.918  |
| Dopamine D3 receptor         | TestSet          | 693    | 68496    | 0.973 | 81.82     | 4736  | 6986      | 0.703  |
|                              | TrainingSet      | 628    | 63562    | 0.995 | 98.41     | 3630  | 6282      | 0.927  |
|                              | WholeSet         | 1321   | 132058   | 0.995 | 98.71     | 8576  | 14208     | 0.935  |
| Dopamine D4 receptor         | TestSet          | 734    | 68455    | 0.980 | 86.38     | 4800  | 7401      | 0.785  |
|                              | TrainingSet      | 689    | 63501    | 0.995 | 99.13     | 4094  | 6894      | 0.929  |
|                              | WholeSet         | 1423   | 131956   | 0.996 | 99.23     | 9357  | 15307     | 0.941  |
| Dopamine D5 receptor         | TestSet          | 35     | 69154    | 0.989 | 97.14     | 150   | 345       | 0.881  |
|                              | TrainingSet      | 72     | 64118    | 0.999 | 100.00    | 272   | 711       | 0.987  |
|                              | WholeSet         | 107    | 133272   | 0.999 | 100.00    | 464   | 1138      | 0.986  |

| Target                         | Set Of compounds | Active | Inactive | AUC   | Recall 5% | SLR   | SLR Limit | BEDROC |
|--------------------------------|------------------|--------|----------|-------|-----------|-------|-----------|--------|
| Serotonin 1a (5-HT1a) receptor | TestSet          | 1649   | 67683    | 0.988 | 91.81     | 11181 | 16664     | 0.876  |
|                                | TrainingSet      | 1649   | 62398    | 0.995 | 97.63     | 10906 | 16534     | 0.928  |
|                                | WholeSet         | 3298   | 130081   | 0.996 | 98.30     | 24000 | 35527     | 0.942  |
| Serotonin 1b (5-HT1b) receptor | TestSet          | 203    | 69129    | 0.981 | 89.66     | 1118  | 2036      | 0.837  |
|                                | TrainingSet      | 479    | 63568    | 0.998 | 99.58     | 2565  | 4786      | 0.970  |
|                                | WholeSet         | 682    | 132697   | 0.998 | 99.56     | 3966  | 7323      | 0.963  |
| Serotonin 1d (5-HT1d) receptor | TestSet          | 159    | 69173    | 0.978 | 89.94     | 818   | 1592      | 0.856  |
|                                | TrainingSet      | 405    | 63642    | 1.000 | 100.00    | 2048  | 4044      | 0.994  |
|                                | WholeSet         | 564    | 132815   | 0.999 | 99.82     | 3075  | 6052      | 0.988  |
| Serotonin 2a (5-HT2a) receptor | TestSet          | 514    | 68818    | 0.970 | 85.02     | 3478  | 5178      | 0.717  |
|                                | TrainingSet      | 871    | 63176    | 0.993 | 98.74     | 5422  | 8720      | 0.899  |
|                                | WholeSet         | 1385   | 131994   | 0.993 | 98.92     | 9399  | 14898     | 0.899  |
| Serotonin 2b (5-HT2b) receptor | TestSet          | 101    | 69231    | 0.958 | 88.12     | 610   | 1008      | 0.788  |
|                                | TrainingSet      | 187    | 63860    | 0.998 | 100.00    | 877   | 1860      | 0.971  |
|                                | WholeSet         | 288    | 133091   | 0.999 | 100.00    | 1487  | 3082      | 0.974  |
| Serotonin 2c (5-HT2c) receptor | TestSet          | 334    | 68998    | 0.959 | 86.53     | 2223  | 3358      | 0.721  |
|                                | TrainingSet      | 516    | 63531    | 0.995 | 99.61     | 2982  | 5157      | 0.920  |
|                                | WholeSet         | 850    | 132529   | 0.996 | 99.76     | 5311  | 9132      | 0.939  |
| Serotonin 3a (5-HT3a) receptor | TestSet          | 61     | 69271    | 0.992 | 95.08     | 264   | 606       | 0.904  |
|                                | TrainingSet      | 113    | 63934    | 1.000 | 100.00    | 452   | 1120      | 0.991  |
|                                | WholeSet         | 174    | 133205   | 1.000 | 100.00    | 774   | 1857      | 0.992  |
| Serotonin 4 (5-HT4) receptor   | TestSet          | 147    | 69185    | 0.988 | 93.20     | 691   | 1471      | 0.917  |
|                                | TrainingSet      | 38     | 64009    | 0.999 | 100.00    | 118   | 372       | 0.984  |
|                                | WholeSet         | 185    | 133194   | 0.999 | 99.46     | 814   | 1975      | 0.986  |
| Serotonin 5a (5-HT5a) receptor | TestSet          | 18     | 69314    | 0.882 | 55.56     | 110   | 175       | 0.510  |
|                                | TrainingSet      | 53     | 63994    | 0.999 | 100.00    | 172   | 521       | 0.990  |
|                                | WholeSet         | 71     | 133308   | 0.999 | 100.00    | 273   | 752       | 0.980  |
| Serotonin 6 (5-HT6) receptor   | TestSet          | 242    | 69090    | 0.979 | 90.50     | 1227  | 2429      | 0.900  |
|                                | TrainingSet      | 243    | 63804    | 0.999 | 100.00    | 1130  | 2420      | 0.985  |
|                                | WholeSet         | 485    | 132894   | 0.999 | 99.79     | 2598  | 5202      | 0.981  |
| Serotonin 7 (5-HT7) receptor   | TestSet          | 208    | 69124    | 0.945 | 67.31     | 1359  | 2086      | 0.614  |
|                                | TrainingSet      | 121    | 63926    | 0.995 | 99.17     | 561   | 1200      | 0.924  |
|                                | WholeSet         | 329    | 133050   | 0.996 | 99.39     | 1804  | 3523      | 0.931  |

*AUC* = Area under ROC curve

*Recall 5%* = Percent of active retrieve in the top 5% of the data

$$RIE = \frac{\frac{1}{n} \sum_{i=1}^n e^{-\alpha x_i}}{\frac{1}{N} \left( \frac{1 - e^{-\alpha}}{e^{\alpha/N} - 1} \right)}$$

$$BEDROC = RIE \times \frac{\frac{1}{N} \sinh(\alpha/2)}{\cosh(\alpha/2) - \cosh(\alpha/2 - \alpha \frac{n}{N})} + \frac{1}{1 - e^{\alpha \left(\frac{N-n}{N}\right)}}$$

$$SLR = -\sum_{i=1}^n \log(r_i)$$

$$SLR_{limit} = n \log(N) - \text{Gamma}(n, 1)$$

where  $N$  is the number of compounds,  $n$  the number of active compounds,  $r_i$  is the rank of the  $i$ th active in the ordered list,  $x_i$  is the relative rank when scaled ( $x_i = r_i/N$ ) and  $\alpha$  a tuning parameter ( $\alpha$  was set to 20, which means that 80% of the contribution to the BEDROC score comes from the top 8% of the data)<sup>5</sup>.

A method is significantly better than random ( $p < 0.05$ ) if  $SLR$  is less than  $SLR_{limit}$ <sup>6</sup>.



**Supplementary Table 12b:** ChEMBL (release 1) high confidence model statistics: values for the cut-off score where MCC is maximal.

| Target                         | Set of Compounds | Score | TP   | FP   | TN     | FN  | Specificity | Sensitivity | FPR   | FNR   | Precision | F_Measure | MCC   |
|--------------------------------|------------------|-------|------|------|--------|-----|-------------|-------------|-------|-------|-----------|-----------|-------|
| Alpha-1a adrenergic receptor   | TestSet          | 67    | 234  | 131  | 68376  | 448 | 0.998       | 0.343       | 0.002 | 0.657 | 0.641     | 0.447     | 0.465 |
|                                | TrainingSet      | 83    | 242  | 112  | 63668  | 168 | 0.998       | 0.590       | 0.002 | 0.410 | 0.684     | 0.634     | 0.633 |
|                                | WholeSet         | 85    | 715  | 159  | 132128 | 377 | 0.999       | 0.655       | 0.001 | 0.345 | 0.818     | 0.727     | 0.730 |
| Alpha-1b adrenergic receptor   | TestSet          | 65    | 187  | 94   | 68594  | 314 | 0.999       | 0.373       | 0.001 | 0.627 | 0.665     | 0.478     | 0.496 |
|                                | TrainingSet      | 70    | 179  | 138  | 63779  | 94  | 0.998       | 0.656       | 0.002 | 0.344 | 0.565     | 0.607     | 0.607 |
|                                | WholeSet         | 81    | 522  | 179  | 132426 | 252 | 0.999       | 0.674       | 0.001 | 0.326 | 0.745     | 0.708     | 0.707 |
| Alpha-1d adrenergic receptor   | TestSet          | 71    | 187  | 68   | 68498  | 436 | 0.999       | 0.300       | 0.001 | 0.700 | 0.733     | 0.426     | 0.466 |
|                                | TrainingSet      | 72    | 257  | 130  | 63718  | 85  | 0.998       | 0.751       | 0.002 | 0.249 | 0.664     | 0.705     | 0.705 |
|                                | WholeSet         | 86    | 660  | 126  | 132288 | 305 | 0.999       | 0.684       | 0.001 | 0.316 | 0.840     | 0.754     | 0.756 |
| Alpha-2a adrenergic receptor   | TestSet          | 31    | 33   | 49   | 68901  | 206 | 0.999       | 0.138       | 0.001 | 0.862 | 0.402     | 0.206     | 0.234 |
|                                | TrainingSet      | 40    | 110  | 56   | 63999  | 25  | 0.999       | 0.815       | 0.001 | 0.185 | 0.663     | 0.731     | 0.734 |
|                                | WholeSet         | 72    | 213  | 30   | 132975 | 161 | 1.000       | 0.570       | 0.000 | 0.430 | 0.877     | 0.690     | 0.706 |
| Alpha-2b adrenergic receptor   | TestSet          | 58    | 7    | 0    | 69082  | 100 | 1.000       | 0.065       | 0.000 | 0.935 | 1.000     | 0.123     | 0.256 |
|                                | TrainingSet      | 36    | 90   | 65   | 64022  | 13  | 0.999       | 0.874       | 0.001 | 0.126 | 0.581     | 0.698     | 0.712 |
|                                | WholeSet         | 39    | 165  | 159  | 133010 | 45  | 0.999       | 0.786       | 0.001 | 0.214 | 0.509     | 0.618     | 0.632 |
| Alpha-2c adrenergic receptor   | TestSet          | 66    | 7    | 0    | 69035  | 147 | 1.000       | 0.045       | 0.000 | 0.955 | 1.000     | 0.087     | 0.213 |
|                                | TrainingSet      | 36    | 91   | 62   | 64023  | 14  | 0.999       | 0.867       | 0.001 | 0.133 | 0.595     | 0.705     | 0.717 |
|                                | WholeSet         | 49    | 184  | 46   | 133074 | 75  | 1.000       | 0.710       | 0.000 | 0.290 | 0.800     | 0.753     | 0.753 |
| Dopamine D1 receptor           | TestSet          | 24    | 273  | 805  | 68001  | 110 | 0.988       | 0.713       | 0.012 | 0.287 | 0.253     | 0.374     | 0.420 |
|                                | TrainingSet      | 64    | 272  | 80   | 63744  | 94  | 0.999       | 0.743       | 0.001 | 0.257 | 0.773     | 0.758     | 0.756 |
|                                | WholeSet         | 64    | 568  | 237  | 132393 | 181 | 0.998       | 0.758       | 0.002 | 0.242 | 0.706     | 0.731     | 0.730 |
| Dopamine D2 receptor           | TestSet          | 16    | 1542 | 2304 | 64926  | 417 | 0.966       | 0.787       | 0.034 | 0.213 | 0.401     | 0.531     | 0.545 |
|                                | TrainingSet      | 45    | 1951 | 686  | 61223  | 330 | 0.989       | 0.855       | 0.011 | 0.145 | 0.740     | 0.793     | 0.787 |
|                                | WholeSet         | 44    | 3681 | 1616 | 127523 | 559 | 0.987       | 0.868       | 0.013 | 0.132 | 0.695     | 0.772     | 0.769 |
| Dopamine D3 receptor           | TestSet          | 9     | 586  | 3040 | 65456  | 107 | 0.956       | 0.846       | 0.044 | 0.154 | 0.162     | 0.271     | 0.358 |
|                                | TrainingSet      | 67    | 377  | 75   | 63487  | 251 | 0.999       | 0.600       | 0.001 | 0.400 | 0.834     | 0.698     | 0.705 |
|                                | WholeSet         | 68    | 799  | 188  | 131870 | 522 | 0.999       | 0.605       | 0.001 | 0.395 | 0.810     | 0.692     | 0.697 |
| Dopamine D4 receptor           | TestSet          | 33    | 475  | 851  | 67604  | 259 | 0.988       | 0.647       | 0.012 | 0.353 | 0.358     | 0.461     | 0.474 |
|                                | TrainingSet      | 51    | 550  | 333  | 63168  | 139 | 0.995       | 0.798       | 0.005 | 0.202 | 0.623     | 0.700     | 0.702 |
|                                | WholeSet         | 59    | 1081 | 491  | 131465 | 342 | 0.996       | 0.760       | 0.004 | 0.240 | 0.688     | 0.722     | 0.720 |
| Dopamine D5 receptor           | TestSet          | 58    | 16   | 9    | 69145  | 19  | 1.000       | 0.457       | 0.000 | 0.543 | 0.640     | 0.533     | 0.541 |
|                                | TrainingSet      | 58    | 57   | 19   | 64099  | 15  | 1.000       | 0.792       | 0.000 | 0.208 | 0.750     | 0.770     | 0.770 |
|                                | WholeSet         | 88    | 50   | 16   | 133256 | 57  | 1.000       | 0.467       | 0.000 | 0.533 | 0.758     | 0.578     | 0.595 |
| Serotonin 1a (5-HT1a) receptor | TestSet          | 28    | 1247 | 769  | 66914  | 402 | 0.989       | 0.756       | 0.011 | 0.244 | 0.619     | 0.680     | 0.675 |
|                                | TrainingSet      | 46    | 1418 | 694  | 61704  | 231 | 0.989       | 0.860       | 0.011 | 0.140 | 0.671     | 0.754     | 0.753 |
|                                | WholeSet         | 52    | 2792 | 950  | 129131 | 506 | 0.993       | 0.847       | 0.007 | 0.153 | 0.746     | 0.793     | 0.789 |
| Serotonin 1b (5-HT1b) receptor | TestSet          | 52    | 107  | 116  | 69013  | 96  | 0.998       | 0.527       | 0.002 | 0.473 | 0.480     | 0.502     | 0.501 |
|                                | TrainingSet      | 60    | 413  | 167  | 63401  | 66  | 0.997       | 0.862       | 0.003 | 0.138 | 0.712     | 0.780     | 0.782 |
|                                | WholeSet         | 69    | 520  | 256  | 132441 | 162 | 0.998       | 0.762       | 0.002 | 0.238 | 0.670     | 0.713     | 0.713 |
| Serotonin 1d (5-HT1d) receptor | TestSet          | 55    | 96   | 81   | 69092  | 63  | 0.999       | 0.604       | 0.001 | 0.396 | 0.542     | 0.571     | 0.571 |
|                                | TrainingSet      | 73    | 366  | 37   | 63605  | 39  | 0.999       | 0.904       | 0.001 | 0.096 | 0.908     | 0.906     | 0.905 |
|                                | WholeSet         | 81    | 451  | 44   | 132771 | 113 | 1.000       | 0.800       | 0.000 | 0.200 | 0.911     | 0.852     | 0.853 |

| Target                         | Set of Compounds | Score | TP   | FP   | TN     | FN  | Specificity | Sensitivity | FPR   | FNR   | Precision | F_Measure | MCC   |
|--------------------------------|------------------|-------|------|------|--------|-----|-------------|-------------|-------|-------|-----------|-----------|-------|
| Serotonin 2a (5-HT2a) receptor | TestSet          | 23    | 329  | 1325 | 67493  | 185 | 0.981       | 0.640       | 0.019 | 0.360 | 0.199     | 0.304     | 0.349 |
|                                | TrainingSet      | 49    | 625  | 480  | 62696  | 246 | 0.992       | 0.718       | 0.008 | 0.282 | 0.566     | 0.633     | 0.631 |
|                                | WholeSet         | 44    | 1131 | 1403 | 130591 | 254 | 0.989       | 0.817       | 0.011 | 0.183 | 0.446     | 0.577     | 0.598 |
| Serotonin 2b (5-HT2b) receptor | TestSet          | 21    | 48   | 230  | 69001  | 53  | 0.997       | 0.475       | 0.003 | 0.525 | 0.173     | 0.253     | 0.285 |
|                                | TrainingSet      | 46    | 149  | 175  | 63685  | 38  | 0.997       | 0.797       | 0.003 | 0.203 | 0.460     | 0.583     | 0.604 |
|                                | WholeSet         | 48    | 230  | 255  | 132836 | 58  | 0.998       | 0.799       | 0.002 | 0.201 | 0.474     | 0.595     | 0.614 |
| Serotonin 2c (5-HT2c) receptor | TestSet          | 30    | 140  | 496  | 68502  | 194 | 0.993       | 0.419       | 0.007 | 0.581 | 0.220     | 0.289     | 0.299 |
|                                | TrainingSet      | 38    | 439  | 592  | 62939  | 77  | 0.991       | 0.851       | 0.009 | 0.149 | 0.426     | 0.568     | 0.598 |
|                                | WholeSet         | 44    | 673  | 689  | 131840 | 177 | 0.995       | 0.792       | 0.005 | 0.208 | 0.494     | 0.608     | 0.623 |
| Serotonin 3a (5-HT3a) receptor | TestSet          | 37    | 44   | 37   | 69234  | 17  | 0.999       | 0.721       | 0.001 | 0.279 | 0.543     | 0.620     | 0.626 |
|                                | TrainingSet      | 60    | 97   | 36   | 63898  | 16  | 0.999       | 0.858       | 0.001 | 0.142 | 0.729     | 0.789     | 0.791 |
|                                | WholeSet         | 69    | 139  | 45   | 133160 | 35  | 1.000       | 0.799       | 0.000 | 0.201 | 0.755     | 0.777     | 0.777 |
| Serotonin 4 (5-HT4) receptor   | TestSet          | 25    | 103  | 37   | 69148  | 44  | 0.999       | 0.701       | 0.001 | 0.299 | 0.736     | 0.718     | 0.717 |
|                                | TrainingSet      | 86    | 25   | 2    | 64007  | 13  | 1.000       | 0.658       | 0.000 | 0.342 | 0.926     | 0.769     | 0.780 |
|                                | WholeSet         | 89    | 147  | 14   | 133180 | 38  | 1.000       | 0.795       | 0.000 | 0.205 | 0.913     | 0.850     | 0.852 |
| Serotonin 5a (5-HT5a) receptor | TestSet          | 64    | 5    | 1    | 69313  | 13  | 1.000       | 0.278       | 0.000 | 0.722 | 0.833     | 0.417     | 0.481 |
|                                | TrainingSet      | 52    | 42   | 10   | 63984  | 11  | 1.000       | 0.792       | 0.000 | 0.208 | 0.808     | 0.800     | 0.800 |
|                                | WholeSet         | 93    | 36   | 0    | 133308 | 35  | 1.000       | 0.507       | 0.000 | 0.493 | 1.000     | 0.673     | 0.712 |
| Serotonin 6 (5-HT6) receptor   | TestSet          | 56    | 148  | 18   | 69072  | 94  | 1.000       | 0.612       | 0.000 | 0.388 | 0.892     | 0.725     | 0.738 |
|                                | TrainingSet      | 58    | 188  | 17   | 63787  | 55  | 1.000       | 0.774       | 0.000 | 0.226 | 0.917     | 0.839     | 0.842 |
|                                | WholeSet         | 58    | 382  | 55   | 132839 | 103 | 1.000       | 0.788       | 0.000 | 0.212 | 0.874     | 0.829     | 0.829 |
| Serotonin 7 (5-HT7) receptor   | TestSet          | 62    | 54   | 10   | 69114  | 154 | 1.000       | 0.260       | 0.000 | 0.740 | 0.844     | 0.397     | 0.467 |
|                                | TrainingSet      | 64    | 62   | 24   | 63902  | 59  | 1.000       | 0.512       | 0.000 | 0.488 | 0.721     | 0.599     | 0.607 |
|                                | WholeSet         | 69    | 193  | 101  | 132949 | 136 | 0.999       | 0.587       | 0.001 | 0.413 | 0.656     | 0.620     | 0.620 |

TP = true positive  
FP = false positive  
TN = true negative  
FN = false negative

Specificity =  $TN / (FP + TN)$   
Sensitivity =  $TP / (TP + FN)$   
False positive rate (FPR) =  $FP / (FP + TN)$   
False negative rate (FNR) =  $FN / (TP + FN)$   
Precision =  $TP / (TP + FP)$

$$F_{measure} = \frac{2TP}{2TP + FN + FP}$$

$$MCC = \frac{TP \times TN - FP \times FN}{\sqrt{(TP + FP)(TP + FN)(TN + FP)(TN + FN)}}$$

**Supplementary Table 12c:** Dopamine models using ChEMBL (pre-release) data: all compound model statistics.

Pipeline Pilot internal validation<sup>7</sup>: a leave-one-out cross-validation is performed: one compound is removed from the set, a model is built with the remaining data and the compound is scored; the process is repeated until every compound is scored.

Once the validation is done, some information can be calculated:

- AUC: The area under ROC curve
- Cut-off: the best split score that minimizes the sum of the percent misclassified for category members and for category nonmembers
- TP/FN & FP/TN: Contingency table generated using the split value cut-off

| <b>Output</b>                 | <b>AUC</b> | <b>Cut-off</b> | <b>TP/FN<br/>FP/TN</b>   | <b>Active in Category</b> |
|-------------------------------|------------|----------------|--------------------------|---------------------------|
| Dopamine D1 receptor          | 0.804      | 12.132         | 839/601<br>4528/209139   | 1440                      |
| Dopamine D2 receptor          | 0.836      | 14.873         | 4435/1324<br>6320/203028 | 5759                      |
| Dopamine D3 receptor          | 0.803      | 12.032         | 1468/673<br>7862/205104  | 2141                      |
| Dopamine D4 receptor          | 0.812      | 13.898         | 1498/519<br>8025/205065  | 2017                      |
| Dopamine D5 receptor          | 0.665      | -4.737         | 532/8<br>97050/117517    | 540                       |
| Other (non dopamine receptor) | 0.820      | -3.861         | 203587/4934<br>1550/5036 | 208521                    |

### Supplementary information references

1. Mach, U.R., Hackling, A.E., Perachon, S., Ferry, S., Wermuth, C.G., Schwartz, J.-C., Sokoloff, P. & Stark, H. Development of Novel 1,2,3,4-Tetrahydroisoquinoline Derivatives and Closely Related Compounds as Potent and Selective Dopamine D3 Receptor Ligands. *Chembiochem* **5**, 508-518 (2004).
2. Crosby, I.T., Shin, J.K. & Capuano, B. The Application of the Schmidt Reaction and Beckmann Rearrangement to the Synthesis of Bicyclic Lactams: Some Mechanistic Considerations. *Australian Journal of Chemistry* **63**, 211-226 (2010).
3. Henegar, K.E. Concise Synthesis of (S)-N-BOC-2-Hydroxymethylmorpholine and (S)-N-BOC-Morpholine-2-carboxylic Acid. *The Journal of Organic Chemistry* **73**, 3662-3665 (2008).
4. Lin, N.-H., Gunn, D.E., Ryther, K.B., Garvey, D.S., Donnelly-Roberts, D.L., Decker, M.W., Brioni, J.D., Buckley, M.J., Rodrigues, A.D., Marsh, K.G., Anderson, D.J., Buccafusco, J.J., Prendergast, M.A., Sullivan, J.P., Williams, M., Arneric, S.P. & Holladay, M.W. Structure-Activity Studies on 2-Methyl-3-(2(S)-pyrrolidinylmethoxy)pyridine (ABT-089): An Orally Bioavailable 3-Pyridyl Ether Nicotinic Acetylcholine Receptor Ligand with Cognition-Enhancing Properties. *J. Med. Chem.* **40**, 385-390 (1997).
5. Summerfield, S. G. *et al.* Central nervous system drug disposition: the relationship between in situ brain permeability and brain free fraction. *The Journal of pharmacology and experimental therapeutics* **322**, 205-213 (2007).

6. Kalvass, J. C. & Maurer, T. S. Influence of nonspecific brain and plasma binding on CNS exposure: implications for rational drug discovery. *Biopharm. Drug Dispos.* **23**, 327-338 (2002)
7. Truchon, J.F. & Bayly, C.I. Evaluating virtual screening methods: Good and bad metrics for the "early recognition" problem. *J. Chem. Inf. Model.* **47**, 488-508 (2007).
8. Zhao, W., Hevener, K.E., White, S.W., Lee, R.E. & Boyett, J.M. A statistical framework to evaluate virtual screening. *BMC Bioinformatics* **10** (2009).
9. Accelrys Software Inc. Data Modeling Collection: User Guide <http://doc.accelrys.com/library/PipelinePilot/doc/modeling.pdf> (2011)
